# Supplementary material
Source: PubMed Central journal article supplement (PMC10073182)
Supplement: 41598_2023_30667_MOESM1_ESM.pdf [file 41598_2023_30667_MOESM1_ESM.pdf]

## Table of Contents

|                                                                                                                                                                                                           |    |
|-----------------------------------------------------------------------------------------------------------------------------------------------------------------------------------------------------------|----|
| Supplementary results.....                                                                                                                                                                                | 3  |
| Supplementary Table 1: Number of influenza A positive patients' swabs that were available for sampling per subtype .....                                                                                  | 3  |
| Supplementary Fig. 1: Age comparison between the general UVRI-NIC surveillance programme, excluded, and sampled influenza A patients.....                                                                 | 4  |
| Supplementary Fig. 2: Metrics for clean MiSeq reads used for sequence assembly .....                                                                                                                      | 5  |
| Supplementary Table 2: Antigenic drift among Uganda A(H1N1)pdm09 and A(H3N2) influenza viruses.....                                                                                                       | 6  |
| Supplementary Table 3: Antigenic drift observed among Uganda A(H1N1)pdm09 viruses per case, gender, age group, and geographical region per year.....                                                      | 8  |
| Supplementary Table 4: Antigenic drift observed among Uganda A(H3N2) viruses per case, gender, age group, and geographical region per year.....                                                           | 10 |
| Supplementary Table 4 (continued): Antigenic drift observed among Uganda A(H3N2) viruses per case, gender, age group, and geographical region per year .....                                              | 13 |
| Supplementary Table 5: Amino acid substitutions (AASs) in the complete HA, NA, and MP protein sequences of Uganda A(H1N1)pdm09 viruses compared to Southern and Northern Hemisphere vaccines viruses..... | 18 |
| Supplementary Table 6: Amino acid substitutions (AASs) in the complete HA, NA, and MP protein sequences of Uganda A(H3N2) viruses compared to Southern and Northern Hemisphere vaccines viruses.....      | 21 |
| Supplementary Fig. 3: Multiple sequence alignment (MSA) of Uganda A(H3N2) M2 protein sequences with adamantane-susceptible A/New York/392/2004(H3N2) .....                                                | 27 |
| Supplementary Fig. 4: Phylogenies showing the spatial divergence Uganda influenza A viruses .....                                                                                                         | 28 |
| Supplementary Fig. 5: Genetic clades of influenza A viruses that previously circulated in 2010-2018 in Uganda.....                                                                                        | 29 |
| Supplementary Table 7: Details of influenza A viral genetic clades that circulated in Africa from 1994 to 2019 .....                                                                                      | 31 |
| Supplementary Fig. 6: Phylogenetic clustering and clades of Uganda and other Africa A(H1N1)pdm09 viruses in the hemagglutinin gene .....                                                                  | 33 |
| Supplementary Fig. 7: Phylogenetic clustering of Uganda and other Africa A(H1N1)pdm09 viruses in the neuraminidase gene.....                                                                              | 34 |
| Supplementary Fig. 8: Phylogenetic clustering of Uganda and other Africa A(H1N1)pdm09 viruses in the matrix protein gene.....                                                                             | 35 |
| Supplementary Fig. 9: Phylogenetic clustering and clades of Uganda and other Africa A(H3N2) viruses in the hemagglutinin gene .....                                                                       | 36 |
| Supplementary Fig. 10: Phylogenetic clustering of Uganda and other Africa A(H3N2) viruses in the neuraminidase gene.....                                                                                  | 37 |
| Supplementary Fig. 11: Phylogenetic clustering of Uganda and other Africa A(H3N2) viruses in the matrix protein gene.....                                                                                 | 38 |
| Supplementary Table 8: Details of highly supported phylogenetic groups among the newly-generated Uganda viruses and other African viruses .....                                                           | 39 |

|                                                                                                                                                                                                       |    |
|-------------------------------------------------------------------------------------------------------------------------------------------------------------------------------------------------------|----|
| Supplementary materials and methods.....                                                                                                                                                              | 40 |
| Source of swabs and sampling.....                                                                                                                                                                     | 40 |
| Viral RNA isolation and amplification.....                                                                                                                                                            | 40 |
| Next-generation sequencing.....                                                                                                                                                                       | 41 |
| Sequence quality control .....                                                                                                                                                                        | 41 |
| Genome assembly using Iterative Refinement Meta-Assembler (IRMA) .....                                                                                                                                | 41 |
| Identification of amino acid substitutions and their biological relevance across the<br>complete HA, NA, and MP proteins of Uganda IAVs using the influenza surveillance<br>(FluSurver) webtool ..... | 42 |
| Supplementary Fig. 12: Geographical distribution of sampled sentinel sites in the general<br>UVRI-NIC influenza surveillance programme.....                                                           | 44 |
| Supplementary Table 9: Accession numbers for the Africa influenza, clade references,<br>and vaccine viral sequences analysed per subtype .....                                                        | 45 |
| References .....                                                                                                                                                                                      | 47 |

## Supplementary results

**Supplementary Table 1: Number of influenza A positive patients' swabs that were available for sampling per subtype**

| Year         | Total number of swabs from A(H1N1)pdm09 positives | Number of swabs available for sampling (no PCR criteria) | Number of swabs available for sampling PCR flu a subtype (CT≤35) | Number of swabs randomly sampled | Total number of swabs from A(H3N2) positives | Number of swabs available for sampling (no PCR criteria) | Number of swabs available for sampling PCR flu a subtype (CT≤35) | Number of swabs randomly sampled |
|--------------|---------------------------------------------------|----------------------------------------------------------|------------------------------------------------------------------|----------------------------------|----------------------------------------------|----------------------------------------------------------|------------------------------------------------------------------|----------------------------------|
|              | A(H1N1)pdm09                                      |                                                          |                                                                  |                                  | A(H3N2)                                      |                                                          |                                                                  |                                  |
| 2010         | 18                                                | 14                                                       | 14                                                               | 14                               | 19                                           | 13                                                       | 13                                                               | 12                               |
| 2011         | 93                                                | 71                                                       | 67                                                               | 19                               | 51                                           | 45                                                       | 44                                                               | 16                               |
| 2012         | 4                                                 | 3                                                        | 3                                                                | 2                                | 223                                          | 76                                                       | 72                                                               | 15                               |
| 2013         | 71                                                | 23                                                       | 22                                                               | 15                               | 30                                           | 19                                                       | 19                                                               | 15                               |
| 2014         | 145                                               | 25                                                       | 25                                                               | 18                               | 211                                          | 16                                                       | 16                                                               | 12                               |
| 2015         | 144                                               | 130                                                      | 130                                                              | 17                               | 118                                          | 100                                                      | 100                                                              | 14                               |
| 2016         | 1                                                 | 1                                                        | 1                                                                | 1                                | 191                                          | 174                                                      | 174                                                              | 17                               |
| 2017         | 51                                                | 42                                                       | 42                                                               | 19                               | 284                                          | 208                                                      | 206                                                              | 17                               |
| 2018         | 14                                                | 11                                                       | 11                                                               | 11                               | 0                                            | 0                                                        | 0                                                                | 0                                |
| <b>Total</b> | <b>541</b>                                        | <b>320</b>                                               | <b>315</b>                                                       | <b>116</b>                       | <b>1127</b>                                  | <b>651</b>                                               | <b>644</b>                                                       | <b>118</b>                       |

**Supplementary Table 1: The number of IAV positive patient swabs that were available and randomly selected for WGS per subtype per year (2010-2018).** For years where the number of available swabs was less than 15, all available swabs were sampled. Following the first randomisation, 5 A(H1N1)pdm09 and 13 A(H3N2) swabs recorded as available could not be located in the storage freezers. A second randomisation (not based on year) was done excluding swabs from the first randomisation that had successfully been retrieved. The first 5 swabs for the A(H1N1)pdm09 and 13 swabs for the A(H3N2) were chosen bringing the total to 116 and 118, respectively. All numbers are based on the UVRI-NIC laboratory dataset sampled between 22<sup>nd</sup> October 2010 and 9<sup>th</sup> May 2018.

**Supplementary Fig. 1: Age comparison between the general UVRI-NIC surveillance programme, excluded, and sampled influenza A patients**

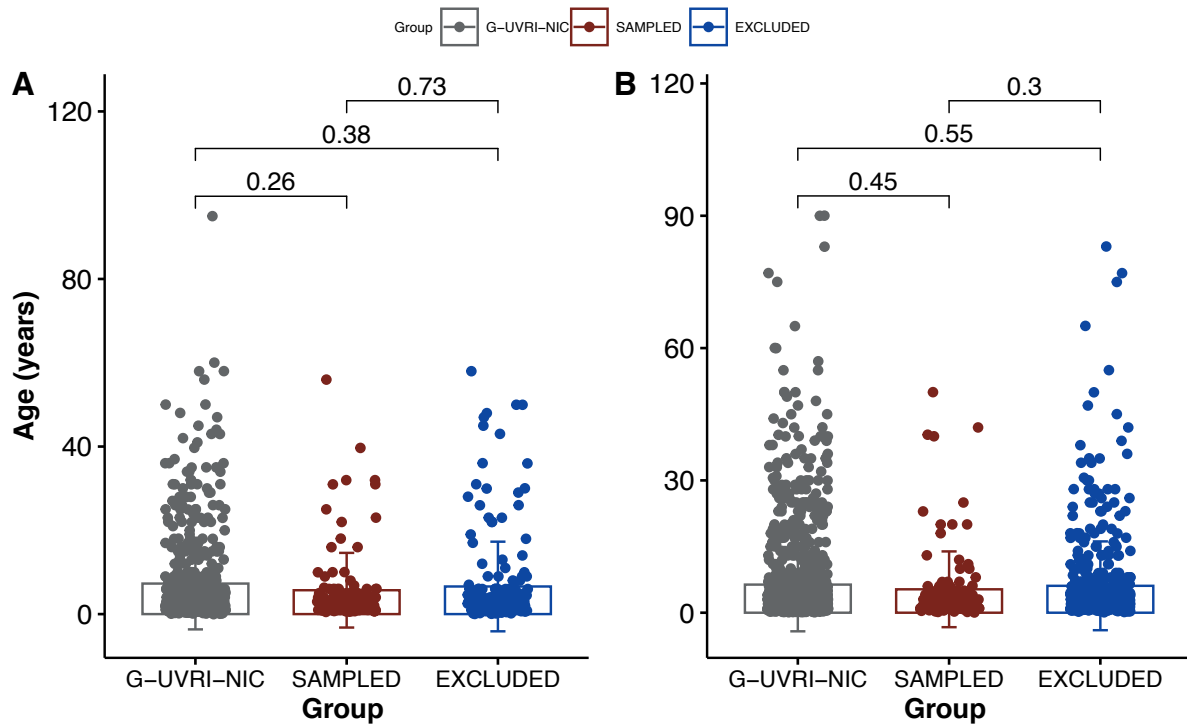

**Supplementary Fig. 1: Age comparison between the general UVRI-NIC surveillance programme, excluded, and sampled influenza A patients.** Group definitions: G-UVRI-NIC are all IAV patients recorded in general UVRI-NIC surveillance database (N=1800), SAMPLED are IAV patients whose swabs were sampled in this study, and EXCLUDED are IAV patients whose swabs were not sequenced due to financial constraints. Group comparisons were done using the Wilcoxon rank sum test at p-value threshold 0.05. **Panel A** shows ages for A(H1N1)pdm09 patients and **Panel B** shows ages for A(H3N2) patients. 20 excluded patients' swabs (9 H1N1pdm09 and 11 H3N2) had no demographic data.

**Supplementary Fig. 2: Metrics for clean MiSeq reads used for sequence assembly**

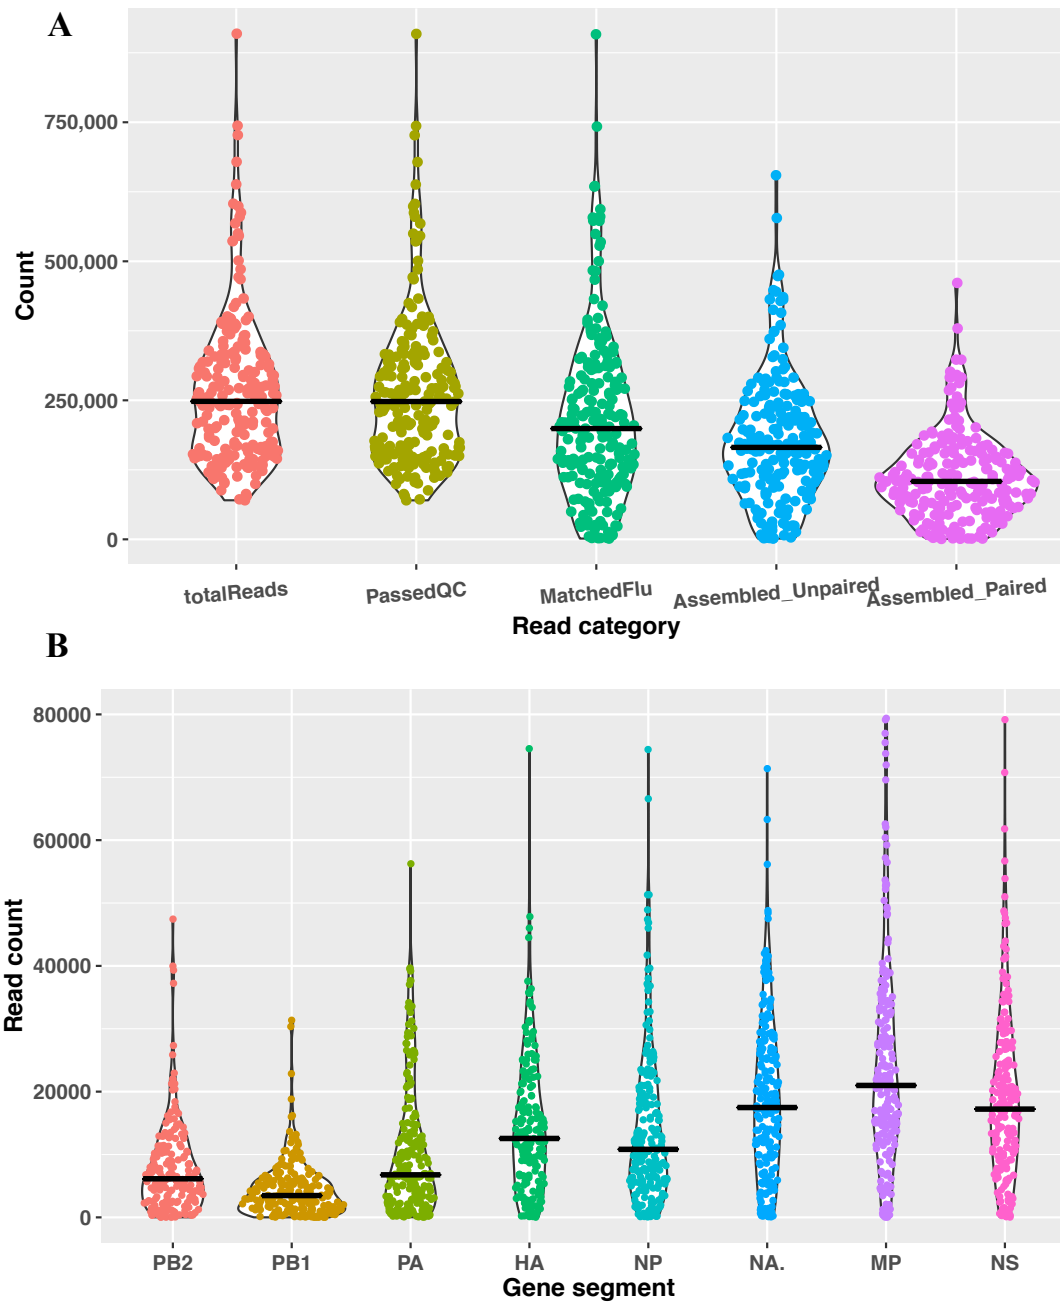

**Supplementary Fig. 2: Metrics for clean MiSeq reads used for sequence assembly using IRMA Flu module.** **Panel A** shows the number of reads in each read category obtained per viral swab sample. **totalReads** is the number of reads used as input for IRMA. **PassedQC** are the reads that passed IRMA internal quality control (QC). **MatchedFlu** are reads that matched IRMA's flu references. **Assembled\_Paired** are the number of paired reads used for the final assemblies, and **Assembled\_Unpaired** are the number of unpaired reads used for the final assemblies. **Panel B** shows the number of paired reads used in the final assembly for each of the eight gene segments: polymerase subunits (PB2, PB1 and PA), hemagglutinin (HA), nucleoprotein (NP), neuraminidase (NA), matrix protein (MP) and non-structural protein (NS). Read metrics are for the 215 A(H1N1)pdm09 and A(H3N2) viruses retained after excluding segments with low transverse coverage depth (<100).

**Supplementary Table 2: Antigenic drift among Uganda A(H1N1)pdm09 and A(H3N2) influenza viruses**

| Season                      | Vaccine: Passage, Genetic clade (Hemisphere)           | No. of Uganda viruses analysed (year sampled) | Amino acid substitutions                                                                                                                                                                                                                                                                                                                                                                                                                                                                                                                                                                        | Season     | Vaccine: Passage, Genetic clade (Hemisphere)                       | No. of Uganda viruses analysed (year sampled) | Amino acid substitutions                                                                                                                                                                                                                                                                                                                                                                                                                                                                                                                                                                                                                                                                                                                                                                                                                                                                                                                                                                                                                                                                                                                  |
|-----------------------------|--------------------------------------------------------|-----------------------------------------------|-------------------------------------------------------------------------------------------------------------------------------------------------------------------------------------------------------------------------------------------------------------------------------------------------------------------------------------------------------------------------------------------------------------------------------------------------------------------------------------------------------------------------------------------------------------------------------------------------|------------|--------------------------------------------------------------------|-----------------------------------------------|-------------------------------------------------------------------------------------------------------------------------------------------------------------------------------------------------------------------------------------------------------------------------------------------------------------------------------------------------------------------------------------------------------------------------------------------------------------------------------------------------------------------------------------------------------------------------------------------------------------------------------------------------------------------------------------------------------------------------------------------------------------------------------------------------------------------------------------------------------------------------------------------------------------------------------------------------------------------------------------------------------------------------------------------------------------------------------------------------------------------------------------------|
| <b>A(H1N1)pdm09 viruses</b> |                                                        |                                               |                                                                                                                                                                                                                                                                                                                                                                                                                                                                                                                                                                                                 |            |                                                                    |                                               |                                                                                                                                                                                                                                                                                                                                                                                                                                                                                                                                                                                                                                                                                                                                                                                                                                                                                                                                                                                                                                                                                                                                           |
| 2010 - 2016                 | <b>A/California/7/2009:</b><br>E2E6, Clade 1 (SNH)     | 77 (2010 - 2016)                              | N125D <sup>a</sup> (1), 156N <sup>a</sup> (77), K163I <sup>a</sup> (5), K163Q <sup>a</sup> (12), S185T <sup>b</sup> (54), A186T <sup>b</sup> (1), S190V <sup>b</sup> (23), S203T <sup>c</sup> (77), R205K <sup>c</sup> (9), H138Q <sup>d</sup> (1), H138R <sup>d</sup> (24), 222D <sup>d</sup> (73), D222E <sup>d</sup> (4), A73T <sup>e</sup> (1)                                                                                                                                                                                                                                              | 2020       | <b>A/Brisbane/02/2018:</b><br>E3/E2, Clade 6B.1A.1 (SH)            | 11 (2018)                                     | -                                                                                                                                                                                                                                                                                                                                                                                                                                                                                                                                                                                                                                                                                                                                                                                                                                                                                                                                                                                                                                                                                                                                         |
| 2017-2018                   | <b>A/Michigan/45/2015:</b><br>E1, Clade 6B.1 (SNH)     | 30 (2017- 2018)                               | S164T <sup>a</sup> (27), 191L <sup>b</sup> (30), S74R <sup>d</sup> (27), K142R <sup>d</sup> (1),                                                                                                                                                                                                                                                                                                                                                                                                                                                                                                |            | <b>A/Guangdong-Maonan/SWL1536/2019:</b><br>E1, clade 6B.1A.5a (NH) | 11 (2018)                                     | I185T <sup>b</sup> (11), A187D <sup>b</sup> (11), E189Q <sup>b</sup> (11)                                                                                                                                                                                                                                                                                                                                                                                                                                                                                                                                                                                                                                                                                                                                                                                                                                                                                                                                                                                                                                                                 |
| 2019                        | <b>A/Michigan/45/2015:</b><br>E1, Clade 6B.1 (SH)      | 11 (2018)                                     | S164T <sup>a</sup> (11), 191L <sup>b</sup> (11), S74R <sup>d</sup> (11)                                                                                                                                                                                                                                                                                                                                                                                                                                                                                                                         |            |                                                                    |                                               |                                                                                                                                                                                                                                                                                                                                                                                                                                                                                                                                                                                                                                                                                                                                                                                                                                                                                                                                                                                                                                                                                                                                           |
|                             | <b>A/Brisbane/02/2018:</b><br>E3/E2, Clade 6B.1A.1(NH) |                                               | -                                                                                                                                                                                                                                                                                                                                                                                                                                                                                                                                                                                               |            |                                                                    |                                               |                                                                                                                                                                                                                                                                                                                                                                                                                                                                                                                                                                                                                                                                                                                                                                                                                                                                                                                                                                                                                                                                                                                                           |
| <b>A(H3N2) viruses</b>      |                                                        |                                               |                                                                                                                                                                                                                                                                                                                                                                                                                                                                                                                                                                                                 |            |                                                                    |                                               |                                                                                                                                                                                                                                                                                                                                                                                                                                                                                                                                                                                                                                                                                                                                                                                                                                                                                                                                                                                                                                                                                                                                           |
| 2010-2011                   | <b>A/Perth/16/2009:</b><br>E3, A/Perth/16 clade (SNH)  | 25 (2010 - 2011)                              | A138S <sup>a</sup> (1), I140K <sup>a</sup> (1), R142G <sup>a</sup> (1), K144N <sup>a</sup> (25), N145S <sup>a</sup> (16), T128A <sup>b</sup> (1), F159S <sup>b</sup> (1), I192V <sup>b</sup> (3), A196T <sup>b</sup> (1), A198S <sup>b</sup> (15), A198P <sup>b</sup> (1), S44N <sup>c</sup> (1), S45N <sup>c</sup> (6), T48I <sup>c</sup> (1), D53N <sup>c</sup> (1), G275S <sup>c</sup> (2), N278K <sup>c</sup> (1), N312S <sup>c</sup> (15), T212A <sup>d</sup> (25), S214I <sup>d</sup> (25), N225D <sup>d</sup> (1), I242V <sup>d</sup> (1), K62E <sup>e</sup> (25), K83E <sup>e</sup> (1) | 2016- 2017 | <b>A/Hong Kong/4801/2014:</b><br>E5/E3, clade 3C.2a (SNH)          | 27 (2016- 2017)                               | N122D <sup>a</sup> (3), S124N <sup>a</sup> (1), A138S <sup>a</sup> (6), I140K <sup>a</sup> (9), R142G <sup>a</sup> (12), R142K <sup>a</sup> (5), S144N <sup>a</sup> (13), S144K <sup>a</sup> (2), S145N <sup>a</sup> (2), S146G <sup>a</sup> (1), T128A <sup>b</sup> (11), T135K <sup>b</sup> (2), H156Q <sup>b</sup> (1), L157S <sup>b</sup> (1), Y159F <sup>b</sup> (7), Y159S <sup>b</sup> (6), K160T <sup>b</sup> (13), P194L <sup>b</sup> (27), A196T <sup>b</sup> (2), Q197R <sup>b</sup> (5), S198A <sup>b</sup> (2), S198P <sup>b</sup> (7), I48T <sup>c</sup> (2), D53E <sup>c</sup> (2), D53N <sup>c</sup> (7), G275S <sup>c</sup> (1), K276R <sup>c</sup> (1), K278N <sup>c</sup> (2), H311Q <sup>c</sup> (18), S312N <sup>c</sup> (8), S96N <sup>d</sup> (26), N121K <sup>d</sup> (9), N171K <sup>d</sup> (7), 203T <sup>d</sup> (27), K207Q <sup>d</sup> (1), I214T <sup>d</sup> (3), D225N <sup>d</sup> (7), E62G <sup>e</sup> (1), E62K <sup>e</sup> (1), Q75H <sup>e</sup> (2), G78D <sup>e</sup> (2), K83E <sup>e</sup> (1), S91N <sup>e</sup> (1), K92R <sup>e</sup> (5), Y94H <sup>e</sup> (2), S262N <sup>e</sup> (1) |
| 2012                        | <b>A/Perth/16/2009:</b><br>E3, A/Perth/16 clade (SH)   | 16 (2012)                                     | S124N <sup>a</sup> (1), I140K <sup>a</sup> (1), R142G <sup>a</sup> (5), <b>K144N<sup>a</sup> (16)</b> , N145S <sup>a</sup> (8), T128A <sup>b</sup> (5), <b>A198S<sup>b</sup> (8)</b> , S45N <sup>c</sup> (13), T48I <sup>c</sup> (5), N278K <sup>c</sup> (5), N312S <sup>c</sup> (8), N121K <sup>d</sup> (1), <b>T212A<sup>d</sup> (16)</b> , S214V <sup>d</sup> (3), <b>S214I<sup>d</sup> (13)</b> , I242V <sup>d</sup> (1), <b>K62E<sup>e</sup> (16)</b> , S262N <sup>e</sup> (3)                                                                                                             | 2018       | <b>A/Singapore/INFIMH-16-0019/2016:</b> E5, Clade 3C.2a1 (SNH)     | 13 (2017)                                     | N122D <sup>a</sup> (2), A138S <sup>a</sup> (5), G140R <sup>a</sup> (1), I140K <sup>a</sup> (6), G142R <sup>a</sup> (6), S144N <sup>a</sup> (7), S145N <sup>a</sup> (2), S146G <sup>a</sup> (1), T128A <sup>b</sup> (5), T135K <sup>b</sup> (2), H156Q <sup>b</sup> (1), Y159F <sup>b</sup> (2), Y159S <sup>b</sup> (5), K160T <sup>b</sup> (5), P194L <sup>b</sup> (13), A196T <sup>b</sup> (2), S198A <sup>b</sup> (2), Q197R <sup>b</sup> (1), S198P <sup>b</sup> (5), I48T <sup>c</sup> (2), D53E <sup>c</sup> (1), D53N <sup>c</sup> (2), G275S <sup>c</sup> (1), K276R <sup>c</sup> (1), K278N <sup>c</sup> (2), H311Q <sup>c</sup> (10), S312N <sup>c</sup> (7), K121N <sup>d</sup> (8), K171N <sup>d</sup> (8), I214T <sup>d</sup> (2), 225N <sup>d</sup> (2), 225D <sup>d</sup> (11), Q75H <sup>e</sup> (1), G78D <sup>e</sup> (2), K83E <sup>e</sup> (1), K92R <sup>e</sup> (3), Y94H <sup>e</sup> (2)                                                                                                                                                                                                                           |

|      |                                                             |           |                                                                                                                                                                                                                                                                                                                                                                                                                                                                                                                                                                                                                                               |      |                                                              |           |                                                                                                                                                                                                                                                                                                                                                                                                                                                                                                                                                                                                                                                                                                                                                                                                                                                                                                                                                                                                                                          |
|------|-------------------------------------------------------------|-----------|-----------------------------------------------------------------------------------------------------------------------------------------------------------------------------------------------------------------------------------------------------------------------------------------------------------------------------------------------------------------------------------------------------------------------------------------------------------------------------------------------------------------------------------------------------------------------------------------------------------------------------------------------|------|--------------------------------------------------------------|-----------|------------------------------------------------------------------------------------------------------------------------------------------------------------------------------------------------------------------------------------------------------------------------------------------------------------------------------------------------------------------------------------------------------------------------------------------------------------------------------------------------------------------------------------------------------------------------------------------------------------------------------------------------------------------------------------------------------------------------------------------------------------------------------------------------------------------------------------------------------------------------------------------------------------------------------------------------------------------------------------------------------------------------------------------|
|      | <b>A/Victoria/361/2011:</b><br>E3/E3, Clade 3C.1 (NH)       |           | S124N <sup>a</sup> (1), I140K <sup>a</sup> (1), R142G <sup>a</sup> (5), N145S <sup>a</sup> (8), T128A <sup>b</sup> (5), <b>Q156H<sup>b</sup> (16), V186G<sup>b</sup> (16), S198A<sup>b</sup> (8), N45S<sup>c</sup> (3), I48T<sup>c</sup> (11), N278K<sup>c</sup> (5), S312N<sup>c</sup> (8), N121K<sup>d</sup> (1), I214V<sup>d</sup> (3), Y219S<sup>d</sup> (16), I242V<sup>d</sup> (1), S262N<sup>e</sup> (3)</b>                                                                                                                                                                                                                           | 2019 | <b>A/Switzerland/8060/2017</b><br>: E5/E2, Clade 3C.2a2 (SH) | 13 (2017) | N122D <sup>a</sup> (2), <b>K131T<sup>a</sup> (13)</b> , A138S <sup>a</sup> (5), I140K <sup>a</sup> (5), <b>K142R<sup>a</sup> (8), K142G<sup>a</sup> (5), S144N<sup>a</sup> (7)</b> , S145N <sup>a</sup> (2), S146G <sup>a</sup> (1), <b>T128A<sup>b</sup> (5)</b> , T135K <sup>b</sup> (2), H156Q <sup>b</sup> (1), Y159F <sup>b</sup> (2), <b>Y159S<sup>b</sup> (5)</b> , K160T <sup>b</sup> (6), P194L <sup>b</sup> (13), A196T <sup>b</sup> (2), Q197R <sup>b</sup> (1), S198A <sup>b</sup> (2), S198P <sup>b</sup> (5), I48T <sup>c</sup> (2), D53E <sup>c</sup> (1), D53N <sup>c</sup> (2), G275S <sup>c</sup> (1), K276R <sup>c</sup> (1), K278N <sup>c</sup> (2), 300I <sup>c</sup> (13), <b>H311Q<sup>c</sup> (10)</b> , S312N <sup>c</sup> (7), <b>S96N<sup>d</sup> (13)</b> , N121K <sup>d</sup> (5), N171K <sup>d</sup> (5), I214T <sup>d</sup> (2), D225N <sup>d</sup> (2), Q75H <sup>e</sup> (1), G78D <sup>e</sup> (2), K83E <sup>e</sup> (1), K92R <sup>e</sup> (3), Y94H <sup>e</sup> (2), <b>Q261R<sup>e</sup> (13)</b> |
| 2013 | <b>A/Victoria/361/2011:</b><br>E3/E3, Clade 3C.1 (SH)       | 6 (2013)  | N122S <sup>a</sup> (1), S124N <sup>a</sup> (1), I140K <sup>a</sup> (1), R142G <sup>a</sup> (6), N145S <sup>a</sup> (6), <b>T128A<sup>b</sup> (6), Q156H<sup>b</sup> (6)</b> , L157S <sup>b</sup> (1), V186G <sup>b</sup> (6), Q197H <sup>b</sup> (1), D53N <sup>c</sup> (1), <b>N278K<sup>c</sup> (6)</b> , V297I <sup>c</sup> (1), I214T <sup>d</sup> (1), <b>Y219S<sup>d</sup> (6)</b> , S91G <sup>e</sup> (1)                                                                                                                                                                                                                              |      | <b>A/Kansas/14/2017:</b> E5, Clade 3C.3a (NH)                |           | N122D <sup>a</sup> (2), S138A <sup>a</sup> (8), I140K <sup>a</sup> (5), <b>G142R<sup>a</sup> (7), G142K<sup>a</sup> (1), K144S<sup>a</sup> (6), K144N<sup>a</sup> (7)</b> , S145N <sup>a</sup> (2), S146G <sup>a</sup> (1), <b>A128T<sup>b</sup> (8), T135K<sup>b</sup> (2)</b> , H156Q <sup>b</sup> (1), S159F <sup>b</sup> (2), <b>S159Y<sup>b</sup> (6)</b> , K160T <sup>b</sup> (6), <b>N190D<sup>b</sup> (6), S193F<sup>b</sup> (13)</b> , A196T <sup>b</sup> (2), Q197R <sup>b</sup> (1), S198A <sup>b</sup> (2), S198P <sup>b</sup> (5), I48T <sup>c</sup> (2), D53E <sup>c</sup> (1), D53N <sup>c</sup> (2), G275S <sup>c</sup> (1), K276R <sup>c</sup> (1), K278N <sup>c</sup> (2), <b>Q311H<sup>c</sup> (3)</b> , S312N <sup>c</sup> (7), N121K <sup>d</sup> (5), N171K <sup>d</sup> (5), I214T <sup>d</sup> (2), D225N <sup>d</sup> (2), <b>246N<sup>d</sup> (13)</b> , Q75H <sup>e</sup> (1), G78D <sup>e</sup> (2), K83E <sup>e</sup> (1), <b>N91S<sup>e</sup> (13)</b> , K92R <sup>e</sup> (3), Y94H <sup>e</sup> (2)      |
|      | <b>A/Texas/50/2012:</b><br>E5, Clade 3C.1 (NH)              |           | N122S <sup>a</sup> (1), S124N <sup>a</sup> (1), I140K <sup>a</sup> (1), R142G <sup>a</sup> (6), N145S <sup>a</sup> (6), <b>N128A<sup>b</sup> (6)</b> , L157S <sup>b</sup> (1), V186G <sup>b</sup> (6), Q197H <sup>b</sup> (1), <b>P198S<sup>b</sup> (6)</b> , D53N <sup>c</sup> (1), V297I <sup>c</sup> (1), I214T <sup>d</sup> (1), <b>F219S<sup>d</sup> (6)</b> , S91G <sup>e</sup> (1)                                                                                                                                                                                                                                                     | 2020 | <b>A/South Australia/34/2019:</b><br>E5, Clade 3C.2a1b (SH)  | 13 (2017) | N122D <sup>a</sup> (2), <b>K131T<sup>a</sup> (13)</b> , A138S <sup>a</sup> (5), I140K <sup>a</sup> (5), G142R <sup>a</sup> (7), G142K <sup>a</sup> (1), S144N <sup>a</sup> (7), S145N <sup>a</sup> (2), S146G <sup>a</sup> (1), <b>T128A<sup>b</sup> (5), T135K<sup>b</sup> (2)</b> , H156Q <sup>b</sup> (1), Y159F <sup>b</sup> (2), Y159S <sup>b</sup> (5), K160T <sup>b</sup> (6), <b>I186G<sup>b</sup> (13)</b> , A196T <sup>b</sup> (2), Q197R <sup>b</sup> (1), S198A <sup>b</sup> (2), S198P <sup>b</sup> (5), I48T <sup>c</sup> (2), D53E <sup>c</sup> (1), D53N <sup>c</sup> (2), G275S <sup>c</sup> (1), K276R <sup>c</sup> (1), K278N <sup>c</sup> (2), Q311H <sup>c</sup> (3), S312N <sup>c</sup> (7), K121N <sup>d</sup> (8), K171N <sup>d</sup> (8), I214T <sup>d</sup> (2), <b>F219S<sup>d</sup> (13), D225N<sup>d</sup> (2)</b> , G62E <sup>e</sup> (13), Q75H <sup>e</sup> (1), G78D <sup>e</sup> (2), K83E <sup>e</sup> (1), R92K <sup>e</sup> (10), Y94H <sup>e</sup> (2)                                             |
| 2014 | <b>A/Texas/50/2012:</b><br>E5, Clade 3C.1 (SNH)             | 11 (2014) | A138S <sup>a</sup> (1), I140K <sup>a</sup> (6), R142G <sup>a</sup> (11), N145S <sup>a</sup> (11), N128A <sup>b</sup> (11), F159S <sup>b</sup> (1), V186G <sup>b</sup> (11), P198S <sup>b</sup> (10), F219S <sup>d</sup> (11), N121D <sup>d</sup> (1), N225D <sup>d</sup> (1), E62K <sup>e</sup> (1)                                                                                                                                                                                                                                                                                                                                           |      | <b>A/Hong Kong/2671/2019:</b><br>E7, Clade 3C.2a1b (NH)      |           | N122D <sup>a</sup> (2), <b>F137S<sup>a</sup> (13)</b> , S138A <sup>a</sup> (8), I140K <sup>a</sup> (5), G142R <sup>a</sup> (7), G142K <sup>a</sup> (1), S144N <sup>a</sup> (7), S145N <sup>a</sup> (2), S146G <sup>a</sup> (1), <b>A128T<sup>b</sup> (8), K135T<sup>b</sup> (11)</b> , H156Q <sup>b</sup> (1), Y159F <sup>b</sup> (2), Y159S <sup>b</sup> (5), I160T <sup>b</sup> (6), <b>I160K<sup>b</sup> (7)</b> , <b>V186G<sup>b</sup> (13), S193F<sup>b</sup> (13)</b> , A196T <sup>b</sup> (2), Q197R <sup>b</sup> (1), S198A <sup>b</sup> (2), S198P <sup>b</sup> (5), I48T <sup>c</sup> (2), D53E <sup>c</sup> (1), D53N <sup>c</sup> (2), G275S <sup>c</sup> (1), K276R <sup>c</sup> (1), K278N <sup>c</sup> (2), Q311H <sup>c</sup> (3), S312N <sup>c</sup> (7), K121N <sup>d</sup> (8), K171N <sup>d</sup> (8), I214T <sup>d</sup> (2), <b>N225D<sup>d</sup> (11)</b> , G62E <sup>e</sup> (13), Q75H <sup>e</sup> (1), G78D <sup>e</sup> (2), K83E <sup>e</sup> (1), R92K <sup>e</sup> (10), Y94H <sup>e</sup> (2)            |
| 2015 | <b>A/Switzerland/9715293/2013:</b> E4/E2, clade 3C.3a (SNH) | 14 (2015) | S124N <sup>a</sup> (1), S124R <sup>a</sup> (1), S138A <sup>a</sup> (13), R140K <sup>a</sup> (5), R140I <sup>a</sup> (7), G142K <sup>a</sup> (2), G142R <sup>a</sup> (4), N144K <sup>a</sup> (1), N144S <sup>a</sup> (6), M168V <sup>a</sup> (2), A128T <sup>b</sup> (6), L157S <sup>b</sup> (1), S159F <sup>b</sup> (7), S159Y <sup>b</sup> (6), K160T <sup>b</sup> (6), V186G <sup>b</sup> (14), Q197R <sup>b</sup> (2), D53N <sup>c</sup> (3), Q311H <sup>c</sup> (6), N171H <sup>d</sup> (1), 219S <sup>d</sup> (14), D225N <sup>d</sup> (7), V88I <sup>e</sup> (1), S91N <sup>e</sup> (1), S262N <sup>e</sup> (1), S265G <sup>e</sup> (1) |      |                                                              |           |                                                                                                                                                                                                                                                                                                                                                                                                                                                                                                                                                                                                                                                                                                                                                                                                                                                                                                                                                                                                                                          |

SH= Southern hemisphere vaccine. NH= Northern hemisphere vaccine. SNH= vaccine shared for both Southern and Northern hemispheres. A(H1N1)pdm09 HA1 antigenic sites are Sa=a, Sb=b, Ca=c, Ca2=d, Cb= e as described by Caton et al., 1982. A(H3N2) HA1 antigenic sites are A=a, B=b, C=c, D=d, and E=e as described by Wiley and Skehel, 1987. The frequency of an amino acid substitution observed at a given antigenic site in Uganda HA1 proteins is reported as (n). The substitutions in **BOLD** are unique relative to the SH and NH vaccines of that given year. Mutations against the NH vaccine strains are coloured **brown** for visualization purposes only. Recommended vaccines for each influenza season are adopted from the World Health Organization (WHO, <https://www.who.int/teams/global-influenza-programme/vaccines/who-recommendations>).

**Supplementary Table 2: Amino acid substitutions in the HA1 antigenic sites of Uganda A(H1N1)pdm09 and A(H3N2) viruses compared to the Southern and Northern vaccine viruses.** This table summarises data in the following Supplementary Tables 3-4.

**Supplementary Table 3: Antigenic drift observed among Uganda A(H1N1)pdm09 viruses per case, gender, age group, and geographical region per year**

| Season                              |                        | 2010-2016<br>(n=77)                                                                                                                                                                                                                                                                                                                          | 2017-2018<br>(n=30)                                                                                   | 2019<br>(Only 2018 viruses analysed, n=11)                              | 2020<br>(Only 2018 viruses analysed, n=11)    |                                               |                                                                           |
|-------------------------------------|------------------------|----------------------------------------------------------------------------------------------------------------------------------------------------------------------------------------------------------------------------------------------------------------------------------------------------------------------------------------------|-------------------------------------------------------------------------------------------------------|-------------------------------------------------------------------------|-----------------------------------------------|-----------------------------------------------|---------------------------------------------------------------------------|
| <b>Vaccine</b>                      |                        | A/California/7/2009: E2E6, Clade 1 (SNH)                                                                                                                                                                                                                                                                                                     | A/Michigan/45/2015: E1, Clade 6B.1 (SNH)                                                              | A/Michigan/45/2015: E1, Clade 6B.1 (SH)                                 | A/Brisbane/02/2018: E3/E2, Clade 6B.1A.1 (NH) | A/Brisbane/02/2018: E3/E2, Clade 6B.1A.1 (SH) | A/Guangdong-Maonan/SWL1536/2019: E1, clade 6B.1A.5a (NH)                  |
| <b>Antigenic drift by case</b>      |                        |                                                                                                                                                                                                                                                                                                                                              |                                                                                                       |                                                                         |                                               |                                               |                                                                           |
| Case                                | ILI (N=67)             | 156N <sup>a</sup> (46), K163I <sup>a</sup> (2), K163Q <sup>a</sup> (7), S185T <sup>b</sup> (29), <b>A186T<sup>b</sup></b> (1), S190V <sup>b</sup> (7), S203T <sup>c</sup> (46), R205K <sup>c</sup> (7), <b>H138Q<sup>d</sup></b> (1), H138R <sup>d</sup> (7), 222D <sup>d</sup> (46)                                                         | S164T <sup>a</sup> (21), 191L <sup>b</sup> (21), <b>K142R<sup>d</sup></b> (1), S74R <sup>d</sup> (21) | S164T <sup>a</sup> (10), 191L <sup>b</sup> (10), S74R <sup>d</sup> (10) | -                                             | -                                             | I185T <sup>b</sup> (10), A187D <sup>b</sup> (10), E189Q <sup>b</sup> (10) |
|                                     | SARI (N=37)            | <b>N125D<sup>a</sup></b> (1), 156N <sup>a</sup> (29), K163I <sup>a</sup> (3), K163Q <sup>a</sup> (5), S185T <sup>b</sup> (25), S190V <sup>b</sup> (16), S203T <sup>c</sup> (29), R205K <sup>c</sup> (2), H138R <sup>d</sup> (17), 222D <sup>d</sup> (26), <b>D222E<sup>d</sup></b> (3), <b>A73T<sup>e</sup></b> (1)                          | S164T <sup>a</sup> (5), 191L <sup>b</sup> (8), S74R <sup>d</sup> (5)                                  | S164T <sup>a</sup> (1), 191L <sup>b</sup> (1), S74R <sup>d</sup> (1)    | -                                             | -                                             | I185T <sup>b</sup> (1), A187D <sup>b</sup> (1), E189Q <sup>b</sup> (1)    |
|                                     | No data (N=3)          | 156N <sup>a</sup> (2), S203T <sup>c</sup> (2), 222D <sup>d</sup> (1), D222E <sup>d</sup> (1)                                                                                                                                                                                                                                                 | S164T <sup>a</sup> (1), 191L <sup>b</sup> (1), S74R <sup>d</sup> (1)                                  | -                                                                       | -                                             | -                                             | -                                                                         |
|                                     | HA not recovered (N=9) | -                                                                                                                                                                                                                                                                                                                                            | -                                                                                                     | -                                                                       | -                                             | -                                             | -                                                                         |
| <b>Antigenic drift by gender</b>    |                        |                                                                                                                                                                                                                                                                                                                                              |                                                                                                       |                                                                         |                                               |                                               |                                                                           |
| Gender                              | Male (N=58)            | <b>N125D<sup>a</sup></b> (1), 156N <sup>a</sup> (44), K163I <sup>a</sup> (1), K163Q <sup>a</sup> (7), S185T <sup>b</sup> (30), <b>A186T<sup>b</sup></b> (1), S190V <sup>b</sup> (12), S203T <sup>c</sup> (44), R205K <sup>c</sup> (6), <b>H138Q<sup>d</sup></b> (1), H138R <sup>d</sup> (12), 222D <sup>d</sup> (43), D222E <sup>d</sup> (1) | S164T <sup>a</sup> (13), 191L <sup>b</sup> (14), <b>K142R<sup>d</sup></b> (1), S74R <sup>d</sup> (13) | S164T <sup>a</sup> (6), 191L <sup>b</sup> (6), S74R <sup>d</sup> (6)    | -                                             | -                                             | I185T <sup>b</sup> (6), A187D <sup>b</sup> (6), E189Q <sup>b</sup> (6)    |
|                                     | Female (n=46)          | 156N <sup>a</sup> (31), K163I <sup>a</sup> (4), K163Q <sup>a</sup> (5), S185T <sup>b</sup> (24), S190V <sup>b</sup> (11), S203T <sup>c</sup> (31), R205K <sup>c</sup> (3), H138R <sup>d</sup> (12), 222D <sup>d</sup> (29), D222E <sup>d</sup> (2), <b>A73T<sup>e</sup></b> (1)                                                              | S164T <sup>a</sup> (13), 191L <sup>b</sup> (15), S74R <sup>d</sup> (13)                               | S164T <sup>a</sup> (5), 191L <sup>b</sup> (5), S74R <sup>d</sup> (5)    | -                                             | -                                             | I185T <sup>b</sup> (5), A187D <sup>b</sup> (5), E189Q <sup>b</sup> (5)    |
|                                     | No data (N=3)          | Same as above                                                                                                                                                                                                                                                                                                                                | Same as above                                                                                         | Same as above                                                           | Same as above                                 | Same as above                                 | Same as above                                                             |
|                                     | HA not recovered (N=9) | -                                                                                                                                                                                                                                                                                                                                            | -                                                                                                     | -                                                                       | -                                             | -                                             | -                                                                         |
| <b>Antigenic drift by age group</b> |                        |                                                                                                                                                                                                                                                                                                                                              |                                                                                                       |                                                                         |                                               |                                               |                                                                           |
| Age [years]                         | 1 month-<2 (N=34)      | 156N <sup>a</sup> (23), K163I <sup>a</sup> (2), K163Q <sup>a</sup> (5), S185T <sup>b</sup> (18), S190V <sup>b</sup> (10), S203T <sup>c</sup> (23), R205K <sup>c</sup> (2), H138R <sup>d</sup> (10), 222D <sup>d</sup> (21), D222E <sup>d</sup> (2)                                                                                           | S164T <sup>a</sup> (9), 191L <sup>b</sup> (11), S74R <sup>d</sup> (9)                                 | S164T <sup>a</sup> (3), 191L <sup>b</sup> (3), S74R <sup>d</sup> (3)    | -                                             | -                                             | I185T <sup>b</sup> (3), A187D <sup>b</sup> (3), E189Q <sup>b</sup> (3)    |
|                                     | 2-<5 (N=39)            | <b>N125D<sup>a</sup></b> (1), 156N <sup>a</sup> (27), K163I <sup>a</sup> (3), K163Q <sup>a</sup> (5), S185T <sup>b</sup> (23), <b>A186T<sup>b</sup></b>                                                                                                                                                                                      | S164T <sup>a</sup> (11), 191L <sup>b</sup> (12), S74R <sup>d</sup> (11)                               | S164T <sup>a</sup> (7), 191L <sup>b</sup> (7), S74R <sup>d</sup> (7)    | -                                             | -                                             | I185T <sup>b</sup> (7), A187D <sup>b</sup> (7), E189Q <sup>b</sup> (7)    |



|                        |                                                                                                                                                                                                  |                                                                                                                                                                                                                |                                                                      |               |               |                                                                        |  |
|------------------------|--------------------------------------------------------------------------------------------------------------------------------------------------------------------------------------------------|----------------------------------------------------------------------------------------------------------------------------------------------------------------------------------------------------------------|----------------------------------------------------------------------|---------------|---------------|------------------------------------------------------------------------|--|
|                        |                                                                                                                                                                                                  | (1), S190V <sup>b</sup> (8), S203T <sup>c</sup> (27), R205K <sup>c</sup> (2), <b>H138Q<sup>d</sup>(1)</b> , H138R <sup>d</sup> (9), 222D <sup>d</sup> (26), D222E <sup>d</sup> (1), <b>A73T<sup>e</sup>(1)</b> |                                                                      |               |               |                                                                        |  |
| 5-<15 (N=20)           | 156N <sup>a</sup> (14), K163Q <sup>a</sup> (2), S185T <sup>b</sup> (10), S190V <sup>b</sup> (4), S203T <sup>c</sup> (14), R205K <sup>c</sup> (2), H138R <sup>d</sup> (4), 222D <sup>d</sup> (14) | S164T <sup>a</sup> (6), 191L <sup>b</sup> (6), <b>K142R<sup>d</sup>(1)</b> , S74R <sup>d</sup> (6)                                                                                                             | S164T <sup>a</sup> (1), 191L <sup>b</sup> (1), S74R <sup>d</sup> (1) | -             | -             | 1185T <sup>b</sup> (1), A187D <sup>b</sup> (1), E189Q <sup>b</sup> (1) |  |
| 15-<50 (N=10)          | 156N <sup>a</sup> (10), S185T <sup>b</sup> (2), S203T <sup>c</sup> (10), R205K <sup>c</sup> (3), 222D <sup>d</sup> (10)                                                                          | -                                                                                                                                                                                                              | -                                                                    | -             | -             | -                                                                      |  |
| 50-<65 (N=1)           | 156N <sup>a</sup> (1), S185T <sup>b</sup> (1), S190V <sup>b</sup> (1), S203T <sup>c</sup> (1), H138R <sup>d</sup> (1), 222D <sup>d</sup> (1)                                                     | -                                                                                                                                                                                                              | -                                                                    | -             | -             | -                                                                      |  |
| ≥ 65 (N=0)             | -                                                                                                                                                                                                | -                                                                                                                                                                                                              | -                                                                    | -             | -             | -                                                                      |  |
| No data (N=3)          | Same as above                                                                                                                                                                                    | Same as above                                                                                                                                                                                                  | Same as above                                                        | Same as above | Same as above | Same as above                                                          |  |
| HA not recovered (N=9) | -                                                                                                                                                                                                | -                                                                                                                                                                                                              | -                                                                    | -             | -             | -                                                                      |  |

#### Antigenic drift by geographical region

|        |                        |                                                                                                                                                                                                                                                           |                                                                                                                  |                                                                         |   |   |                                                                           |
|--------|------------------------|-----------------------------------------------------------------------------------------------------------------------------------------------------------------------------------------------------------------------------------------------------------|------------------------------------------------------------------------------------------------------------------|-------------------------------------------------------------------------|---|---|---------------------------------------------------------------------------|
| Region | Central (N=81)         | 156N <sup>a</sup> (54), K163I <sup>a</sup> (1), K163Q <sup>a</sup> (11), S185T <sup>b</sup> (35), S190V <sup>b</sup> (10), S203T <sup>c</sup> (54), R205K <sup>c</sup> (7), <b>H138Q<sup>d</sup>(1)</b> , H138R <sup>d</sup> (10), 222D <sup>d</sup> (54) | <b>S164T<sup>a</sup>(27)</b> , 191L <sup>b</sup> (27), <b>K142R<sup>d</sup>(1)</b> , <b>S74R<sup>d</sup>(27)</b> | S164T <sup>a</sup> (11), 191L <sup>b</sup> (11), S74R <sup>d</sup> (11) | - | - | 1185T <sup>b</sup> (11), A187D <sup>b</sup> (11), E189Q <sup>b</sup> (11) |
|        | Eastern (N=3)          | <b>N125D<sup>a</sup>(1)</b> , 156N <sup>a</sup> (3), K163Q <sup>a</sup> (1), S185T <sup>b</sup> (3), S190V <sup>b</sup> (2), S203T <sup>c</sup> (3), H138R <sup>d</sup> (3), 222D <sup>d</sup> (3)                                                        | -                                                                                                                | -                                                                       | - | - | -                                                                         |
|        | Northwest (N=11)       | 156N <sup>a</sup> (11), K163I <sup>a</sup> (2), S185T <sup>b</sup> (7), S190V <sup>b</sup> (3), S203T <sup>c</sup> (11), H138R <sup>d</sup> (4), 222D <sup>d</sup> (7), <b>D222E<sup>d</sup>(4)</b>                                                       | -                                                                                                                | -                                                                       | - | - | -                                                                         |
|        | Western (n=12)         | 156N <sup>a</sup> (9), K163I <sup>a</sup> (2), S185T <sup>b</sup> (9), S190V <sup>b</sup> (8), S203T <sup>c</sup> (9), R205K <sup>c</sup> (2), H138R <sup>d</sup> (8), 222D <sup>d</sup> (9), <b>A73T<sup>e</sup>(1)</b>                                  | 191L <sup>b</sup> (3)                                                                                            | -                                                                       | - | - | -                                                                         |
|        | HA not recovered (N=9) | -                                                                                                                                                                                                                                                         | -                                                                                                                | -                                                                       | - | - | -                                                                         |

SH= Southern hemisphere vaccine. NH= Northern hemisphere vaccine. SNH= vaccine shared for both Southern and Northern hemispheres. A(H1N1)pdm09 HA1 antigenic sites are Sa= a, Sb =b, Ca<sub>1</sub>=c, Ca<sub>2</sub> = d, Cb= e as described by Caton et al., 1982. The frequency of an amino acid substitution observed at a given antigenic site in Uganda HA1 proteins is reported as (n). The substitutions in **BOLD** are unique between subgroups relative to the vaccine of a given season. Amino acid substitutions against the NH vaccine strains are coloured **brown** for visualization purposes only. Recommended vaccines for each influenza season are adopted from the World Health Organization (WHO, <https://www.who.int/teams/global-influenza-programme/vaccines/who-recommendations>).

**Supplementary Table 3: Antigenic drift among successfully sequenced Uganda A(H1N1)pdm09 viruses (N=107) from 2010-2020 season vaccine viruses, recommended for the Southern (SH), Northern (NH) hemisphere or both (SNH), by cases, gender, age group, and geographical region. Hemagglutinin (HA) sequences were not recovered for 9 H1N1pdm09 viruses.**

**Supplementary Table 4: Antigenic drift observed among Uganda A(H3N2) viruses per case, gender, age group, and geographical region per year**

| Season                           |               | 2010-2011 (n=25)                                                                                                                                                                                                                                                                                                                                                                                                                                                                                                                   | 2012 (n=16)                                                                                                                                                                                                                                                                                                                                                                                                    | 2013 (n=6)                                                                                                                                                                                                                                                                                                                                                                             |                                                                                                                                                                                                                                                                                          | 2014 (n=11)                                                                                                                                                                                                                                                       | 2015 (n=14)                                                                                                                                                                                                                                                                              |                                                                                                                                                                                                                                                                                                                                                                                                                                                                                                                                                                                                    |
|----------------------------------|---------------|------------------------------------------------------------------------------------------------------------------------------------------------------------------------------------------------------------------------------------------------------------------------------------------------------------------------------------------------------------------------------------------------------------------------------------------------------------------------------------------------------------------------------------|----------------------------------------------------------------------------------------------------------------------------------------------------------------------------------------------------------------------------------------------------------------------------------------------------------------------------------------------------------------------------------------------------------------|----------------------------------------------------------------------------------------------------------------------------------------------------------------------------------------------------------------------------------------------------------------------------------------------------------------------------------------------------------------------------------------|------------------------------------------------------------------------------------------------------------------------------------------------------------------------------------------------------------------------------------------------------------------------------------------|-------------------------------------------------------------------------------------------------------------------------------------------------------------------------------------------------------------------------------------------------------------------|------------------------------------------------------------------------------------------------------------------------------------------------------------------------------------------------------------------------------------------------------------------------------------------|----------------------------------------------------------------------------------------------------------------------------------------------------------------------------------------------------------------------------------------------------------------------------------------------------------------------------------------------------------------------------------------------------------------------------------------------------------------------------------------------------------------------------------------------------------------------------------------------------|
| <b>Vaccine</b>                   |               | A/Perth/16/2009:<br>E3, A/Perth/16 clade (SNH)                                                                                                                                                                                                                                                                                                                                                                                                                                                                                     | A/Perth/16/2009:<br>E3, A/Perth/16 clade (SH)                                                                                                                                                                                                                                                                                                                                                                  | A/Victoria/361/2011:<br>E3/E3, Clade 3C.1 (NH)                                                                                                                                                                                                                                                                                                                                         | A/Victoria/361/2011:<br>E3/E3, Clade 3C.1 (SH)                                                                                                                                                                                                                                           | A/Texas/50/2012:<br>E5, Clade 3C.1 (NH)                                                                                                                                                                                                                           | A/Texas/50/2012:<br>E5, Clade 3C.1 (SNH)                                                                                                                                                                                                                                                 | A/Switzerland/9715293/2013:<br>E4/E2, clade 3C.3a (SNH)                                                                                                                                                                                                                                                                                                                                                                                                                                                                                                                                            |
| <b>Antigenic drift by case</b>   |               |                                                                                                                                                                                                                                                                                                                                                                                                                                                                                                                                    |                                                                                                                                                                                                                                                                                                                                                                                                                |                                                                                                                                                                                                                                                                                                                                                                                        |                                                                                                                                                                                                                                                                                          |                                                                                                                                                                                                                                                                   |                                                                                                                                                                                                                                                                                          |                                                                                                                                                                                                                                                                                                                                                                                                                                                                                                                                                                                                    |
| Case                             | ILI (N= 65)   | <b>A138S<sup>a</sup> (1), I140K<sup>a</sup> (1), R142G<sup>a</sup> (1), K144N<sup>a</sup> (20), N145S<sup>a</sup> (12), T128A<sup>b</sup> (1), F159S<sup>b</sup> (1), I192V<sup>b</sup> (3), A196T<sup>b</sup> (1), A198S<sup>b</sup> (11), A198P<sup>b</sup> (1), S45N<sup>c</sup> (6), T48I<sup>c</sup> (1), G275S<sup>c</sup> (1), N278K<sup>c</sup> (1), N312S<sup>c</sup> (11), T212A<sup>d</sup> (20), S214I<sup>d</sup> (20), N225D<sup>d</sup> (1), I242V<sup>d</sup> (1), K62E<sup>e</sup> (20), K83E<sup>e</sup> (1)</b> | <b>S124N<sup>a</sup> (1), R142G<sup>a</sup> (4), K144N<sup>a</sup> (13), N145S<sup>a</sup> (7), T128A<sup>b</sup> (4), A198S<sup>b</sup> (7), S45N<sup>c</sup> (10), T48I<sup>c</sup> (4), N278K<sup>c</sup> (4), N312S<sup>c</sup> (7), N121K<sup>d</sup> (1), T212A<sup>d</sup> (13), S214V<sup>d</sup> (3), S214I<sup>d</sup> (10), I242V<sup>d</sup> (1), K62E<sup>e</sup> (13), S262N<sup>e</sup> (3)</b> | <b>S124N<sup>a</sup> (1), R142G<sup>a</sup> (4), N145S<sup>a</sup> (7), T128A<sup>b</sup> (4), Q156H<sup>b</sup> (13), V186G<sup>b</sup> (13), S198A<sup>b</sup> (6), N45S<sup>c</sup> (3), I48T<sup>c</sup> (9), N278K<sup>c</sup> (4), S312N<sup>c</sup> (6), N121K<sup>d</sup> (1), I214V<sup>d</sup> (3), Y219S<sup>d</sup> (13), I242V<sup>d</sup> (1), S262N<sup>e</sup> (3)</b> | <b>N122S<sup>a</sup> (1), I140K<sup>a</sup> (1), R142G<sup>a</sup> (4), N145S<sup>a</sup> (4), T128A<sup>b</sup> (4), Q156H<sup>b</sup> (4), V186G<sup>b</sup> (4), Q197H<sup>b</sup> (1), N278K<sup>c</sup> (4), Y219S<sup>d</sup> (4), S91G<sup>e</sup> (1)</b>                        | <b>N122S<sup>a</sup> (1), I140K<sup>a</sup> (1), R142G<sup>a</sup> (4), N145S<sup>a</sup> (4), N128A<sup>b</sup> (4), V186G<sup>b</sup> (4), P198S<sup>b</sup> (3), F219S<sup>d</sup> (4), N121D<sup>d</sup> (1), E62K<sup>e</sup> (1)</b>                        | I140K <sup>a</sup> (4), R142G <sup>a</sup> (4), N145S <sup>a</sup> (4), N128A <sup>b</sup> (4), V186G <sup>b</sup> (4), P198S <sup>b</sup> (3), F219S <sup>d</sup> (4), N121D <sup>d</sup> (1), E62K <sup>e</sup> (1)                                                                    | S138A <sup>a</sup> (4), R140K <sup>a</sup> (1), R140I <sup>a</sup> (1), <b>G142K<sup>a</sup> (2)</b> , N144S <sup>a</sup> (2), A128T <sup>b</sup> (2), S159F <sup>b</sup> (2), S159Y <sup>b</sup> (2), K160T <sup>b</sup> (2), V186G <sup>b</sup> (4), <b>Q197R<sup>b</sup> (2)</b> , D53N <sup>c</sup> (2), Q311H <sup>c</sup> (2), 219S <sup>d</sup> (4), D225N <sup>d</sup> (2)                                                                                                                                                                                                                 |
|                                  | SARI (N=33)   | K144N <sup>a</sup> (4), N145S <sup>a</sup> (4), A198S <sup>b</sup> (4), N312S <sup>c</sup> (4), T212A <sup>d</sup> (4), S214I <sup>d</sup> (4), K62E <sup>e</sup> (4)                                                                                                                                                                                                                                                                                                                                                              | <b>I140K<sup>a</sup> (1), R142G<sup>a</sup> (1), K144N<sup>a</sup> (3), N145S<sup>a</sup> (1), T128A<sup>b</sup> (1), A198S<sup>b</sup> (1), S45N<sup>c</sup> (3), T48I<sup>c</sup> (1), N278K<sup>c</sup> (1), N312S<sup>c</sup> (1), T212A<sup>d</sup> (3), S214I<sup>d</sup> (3), K62E<sup>e</sup> (3)</b>                                                                                                  | <b>I140K<sup>a</sup> (1), R142G<sup>a</sup> (1), N145S<sup>a</sup> (1), T128A<sup>b</sup> (1), Q156H<sup>b</sup> (3), V186G<sup>b</sup> (3), S198A<sup>b</sup> (2), I48T<sup>c</sup> (2), N278K<sup>c</sup> (1), S312N<sup>c</sup> (2), Y219S<sup>d</sup> (3)</b>                                                                                                                      | <b>S124N<sup>a</sup> (1), R142G<sup>a</sup> (2), N145S<sup>a</sup> (2), T128A<sup>b</sup> (2), Q156H<sup>b</sup> (2), L157S<sup>b</sup> (1), V186G<sup>b</sup> (2), D53N<sup>c</sup> (1), N278K<sup>c</sup> (2), V297I<sup>c</sup> (1), I214T<sup>d</sup> (1), Y219S<sup>d</sup> (2)</b> | <b>S124N<sup>a</sup> (1), R142G<sup>a</sup> (2), N145S<sup>a</sup> (2), N128A<sup>b</sup> (2), L157S<sup>b</sup> (1), V186G<sup>b</sup> (2), P198S<sup>b</sup> (2), D53N<sup>c</sup> (1), V297I<sup>c</sup> (1), I214T<sup>d</sup> (1), F219S<sup>d</sup> (2)</b> | <b>A138S<sup>a</sup> (1), I140K<sup>a</sup> (2), R142G<sup>a</sup> (7), N145S<sup>a</sup> (7), N128A<sup>b</sup> (7), F159S<sup>b</sup> (1), V186G<sup>b</sup> (7), P198S<sup>b</sup> (7), F219S<sup>d</sup> (7), N225D<sup>d</sup> (1)</b>                                              | <b>S124N<sup>a</sup> (1), S124R<sup>a</sup> (1), A128T<sup>b</sup> (4), S138A<sup>a</sup> (9), R140K<sup>a</sup> (4), R140I<sup>a</sup> (6), G142R<sup>a</sup> (4), N144S<sup>a</sup> (4), N144K<sup>a</sup> (1), M168V<sup>a</sup> (2), L157S<sup>b</sup> (1), S159F<sup>b</sup> (5), S159Y<sup>b</sup> (4), K160T<sup>b</sup> (4), V186G<sup>b</sup> (10), D53N<sup>c</sup> (1), Q311H<sup>c</sup> (4), N171H<sup>d</sup> (1), I214T<sup>d</sup> (1), 219S<sup>d</sup> (10), D225N<sup>d</sup> (5), V88I<sup>e</sup> (1), S91N<sup>e</sup> (1), S262N<sup>e</sup> (1), S265G<sup>e</sup> (1)</b> |
|                                  | No data (N=1) | K144N <sup>a</sup> (1), <b>S44N<sup>c</sup> (1), D53N<sup>c</sup> (1), G275S<sup>c</sup> (1), T212A<sup>d</sup> (1), S214I<sup>d</sup> (1), K62E<sup>e</sup> (1)</b>                                                                                                                                                                                                                                                                                                                                                               | -                                                                                                                                                                                                                                                                                                                                                                                                              | -                                                                                                                                                                                                                                                                                                                                                                                      | -                                                                                                                                                                                                                                                                                        | -                                                                                                                                                                                                                                                                 | -                                                                                                                                                                                                                                                                                        | -                                                                                                                                                                                                                                                                                                                                                                                                                                                                                                                                                                                                  |
| HA not recovered (N= 19)         | -             | -                                                                                                                                                                                                                                                                                                                                                                                                                                                                                                                                  | -                                                                                                                                                                                                                                                                                                                                                                                                              | -                                                                                                                                                                                                                                                                                                                                                                                      | -                                                                                                                                                                                                                                                                                        | -                                                                                                                                                                                                                                                                 | -                                                                                                                                                                                                                                                                                        |                                                                                                                                                                                                                                                                                                                                                                                                                                                                                                                                                                                                    |
| <b>Antigenic drift by gender</b> |               |                                                                                                                                                                                                                                                                                                                                                                                                                                                                                                                                    |                                                                                                                                                                                                                                                                                                                                                                                                                |                                                                                                                                                                                                                                                                                                                                                                                        |                                                                                                                                                                                                                                                                                          |                                                                                                                                                                                                                                                                   |                                                                                                                                                                                                                                                                                          |                                                                                                                                                                                                                                                                                                                                                                                                                                                                                                                                                                                                    |
| Gender                           | Male (N=57)   | <b>A138S<sup>a</sup> (1), I140K<sup>a</sup> (1), R142G<sup>a</sup> (1), K144N<sup>a</sup> (16), N145S<sup>a</sup> (11), T128A<sup>b</sup> (1), F159S<sup>b</sup> (1), I192V<sup>b</sup> (2), A196T<sup>b</sup> (1), A198S<sup>b</sup> (10), A198P<sup>b</sup> (1),</b>                                                                                                                                                                                                                                                             | <b>S124N<sup>a</sup> (1), I140K<sup>a</sup> (1), R142G<sup>a</sup> (4), K144N<sup>a</sup> (11), N145S<sup>a</sup> (6), T128A<sup>b</sup> (4), A198S<sup>b</sup> (6), S45N<sup>c</sup> (8), T48I<sup>c</sup> (4), N278K<sup>c</sup> (4), N312S<sup>c</sup> (6), N121K<sup>d</sup></b>                                                                                                                           | <b>S124N<sup>a</sup> (1), I140K<sup>a</sup> (1), R142G<sup>a</sup> (4), N145S<sup>a</sup> (6), T128A<sup>b</sup> (4), Q156H<sup>b</sup> (10), V186G<sup>b</sup> (10), S198A<sup>b</sup> (4), N45S<sup>c</sup> (2), I48T<sup>c</sup> (6), N278K<sup>c</sup> (4), S312N<sup>c</sup> (4),</b>                                                                                             | <b>S124N<sup>a</sup> (1), R142G<sup>a</sup> (3), N145S<sup>a</sup> (3), T128A<sup>b</sup> (3), Q156H<sup>b</sup> (3), L157S<sup>b</sup> (1), V186G<sup>b</sup> (3), D53N<sup>c</sup> (1), N278K<sup>c</sup> (3), V297I<sup>c</sup> (1), I214T<sup>d</sup> (1), Y219S<sup>d</sup> (3)</b> | <b>S124N<sup>a</sup> (1), R142G<sup>a</sup> (3), N145S<sup>a</sup> (3), N128A<sup>b</sup> (3), L157S<sup>b</sup> (1), V186G<sup>b</sup> (3), P198S<sup>b</sup> (3), D53N<sup>c</sup> (1), V297I<sup>c</sup> (1), I214T<sup>d</sup> (1), F219S<sup>d</sup> (3)</b> | <b>A138S<sup>a</sup> (1), I140K<sup>a</sup> (2), R142G<sup>a</sup> (4), N145S<sup>a</sup> (4), N128A<sup>b</sup> (4), V186G<sup>b</sup> (4), P198S<sup>b</sup> (4), F159S<sup>b</sup> (1), F219S<sup>d</sup> (4), N121D<sup>d</sup> (1), N225D<sup>d</sup> (1), E62K<sup>e</sup> (1)</b> | <b>S124N<sup>a</sup> (1), S124R<sup>a</sup> (1), S138A<sup>a</sup> (8), R140K<sup>a</sup> (3), R140I<sup>a</sup> (6), G142K<sup>a</sup> (1), G142R<sup>a</sup> (3), N144S<sup>a</sup> (4), N144K<sup>a</sup> (1), M168V<sup>a</sup> (1), A128T<sup>b</sup> (4), L157S<sup>b</sup> (1),</b>                                                                                                                                                                                                                                                                                                         |

|                                     |                          |                                                                                                                                                                                                                                                                                                                                                                                                                                                                                                                                                                                                              |                                                                                                                                                                                                                                                                                                                                                                                                           |                                                                                                                                                                                                                                                                                                                                                                                    |                                                                                                                                                                                                                                                                                                                                                                                       |                                                                                                                                                                                                                                                                                                                                                                      |                                                                                                                                                                                                                                                                    |                                                                                                                                                                                                                                                                                                                                                                                                                                                                                                                                                                                                    |
|-------------------------------------|--------------------------|--------------------------------------------------------------------------------------------------------------------------------------------------------------------------------------------------------------------------------------------------------------------------------------------------------------------------------------------------------------------------------------------------------------------------------------------------------------------------------------------------------------------------------------------------------------------------------------------------------------|-----------------------------------------------------------------------------------------------------------------------------------------------------------------------------------------------------------------------------------------------------------------------------------------------------------------------------------------------------------------------------------------------------------|------------------------------------------------------------------------------------------------------------------------------------------------------------------------------------------------------------------------------------------------------------------------------------------------------------------------------------------------------------------------------------|---------------------------------------------------------------------------------------------------------------------------------------------------------------------------------------------------------------------------------------------------------------------------------------------------------------------------------------------------------------------------------------|----------------------------------------------------------------------------------------------------------------------------------------------------------------------------------------------------------------------------------------------------------------------------------------------------------------------------------------------------------------------|--------------------------------------------------------------------------------------------------------------------------------------------------------------------------------------------------------------------------------------------------------------------|----------------------------------------------------------------------------------------------------------------------------------------------------------------------------------------------------------------------------------------------------------------------------------------------------------------------------------------------------------------------------------------------------------------------------------------------------------------------------------------------------------------------------------------------------------------------------------------------------|
|                                     |                          | S45N <sup>c</sup> (3), <b>T48I<sup>c</sup> (1)</b> , <b>G275S<sup>c</sup> (1)</b> , <b>N278K<sup>c</sup> (1)</b> , N312S <sup>c</sup> (10), T212A <sup>d</sup> (16), S214I <sup>d</sup> (16), <b>N225D<sup>d</sup> (1)</b> , <b>I242V<sup>d</sup> (1)</b> , K62E <sup>e</sup> (16)                                                                                                                                                                                                                                                                                                                           | (1), T212A <sup>d</sup> (11), S214V <sup>d</sup> (2), S214I <sup>d</sup> (8), <b>I242V<sup>d</sup> (1)</b> , K62E <sup>e</sup> (11), S262N <sup>e</sup> (2)                                                                                                                                                                                                                                               | <b>N121K<sup>d</sup> (1)</b> , I214V <sup>d</sup> (2), Y219S <sup>d</sup> (10), <b>I242V<sup>d</sup> (1)</b> , S262N <sup>e</sup> (2)                                                                                                                                                                                                                                              |                                                                                                                                                                                                                                                                                                                                                                                       |                                                                                                                                                                                                                                                                                                                                                                      |                                                                                                                                                                                                                                                                    | S159F <sup>b</sup> (4), S159Y <sup>b</sup> (4), K160T <sup>b</sup> (4), V186G <sup>b</sup> (9), Q197R <sup>b</sup> (1), D53N <sup>c</sup> (2), Q311H <sup>c</sup> (4), <b>I214T<sup>d</sup> (1)</b> , 219S <sup>d</sup> (9), D225N <sup>d</sup> (4), <b>S91N<sup>e</sup> (1)</b> , <b>S265G<sup>e</sup> (1)</b>                                                                                                                                                                                                                                                                                    |
|                                     | Female (N=41)            | K144N <sup>a</sup> (8), N145S <sup>a</sup> (5), I192V <sup>b</sup> (1), A198S <sup>b</sup> (5), S45N <sup>c</sup> (3), N312S <sup>c</sup> (5), T212A <sup>d</sup> (8), S214I <sup>d</sup> (8), K62E <sup>e</sup> (8), <b>K83E<sup>e</sup> (1)</b>                                                                                                                                                                                                                                                                                                                                                            | R142G <sup>a</sup> (1), K144N <sup>a</sup> (6), N145S <sup>a</sup> (2), T128A <sup>b</sup> (1), A198S <sup>b</sup> (2), S45N <sup>c</sup> (5), T48I <sup>c</sup> (1), N278K <sup>c</sup> (1), N312S <sup>c</sup> (2), T212A <sup>d</sup> (6), S214I <sup>d</sup> (5), S214V <sup>d</sup> (1), K62E <sup>e</sup> (6), S262N <sup>e</sup> (1)                                                               | R142G <sup>a</sup> (1), N145S <sup>a</sup> (2), T128A <sup>b</sup> (1), Q156H <sup>b</sup> (6), V186G <sup>b</sup> (6), S198A <sup>b</sup> (4), N45S <sup>c</sup> (1), I48T <sup>c</sup> (5), N278K <sup>c</sup> (1), S312N <sup>c</sup> (4), I214V <sup>d</sup> (1), Y219S <sup>d</sup> (6), S262N <sup>e</sup> (1)                                                               | <b>N122S<sup>a</sup> (1)</b> , <b>I140K<sup>a</sup> (1)</b> , R142G <sup>a</sup> (3), N145S <sup>a</sup> (3), T128A <sup>b</sup> (3), Q156H <sup>b</sup> (3), V186G <sup>b</sup> (3), <b>Q197H<sup>b</sup> (1)</b> , N278K <sup>c</sup> (3), Y219S <sup>d</sup> (3), <b>S91G<sup>e</sup> (1)</b>                                                                                      | <b>N122S<sup>a</sup> (1)</b> , <b>I140K<sup>a</sup> (1)</b> , R142G <sup>a</sup> (3), N145S <sup>a</sup> (3), N128A <sup>b</sup> (3), V186G <sup>b</sup> (3), <b>Q197H<sup>b</sup> (1)</b> , P198S <sup>b</sup> (3), F219S <sup>d</sup> (3), <b>S91G<sup>e</sup> (1)</b>                                                                                             | I140K <sup>a</sup> (4), R142G <sup>a</sup> (7), N145S <sup>a</sup> (7), N128A <sup>b</sup> (7), V186G <sup>b</sup> (7), P198S <sup>b</sup> (6), F219S <sup>d</sup> (7)                                                                                             | S138A <sup>a</sup> (5), R140K <sup>a</sup> (3), R140I <sup>a</sup> (2), G142R <sup>a</sup> (1), G142K <sup>a</sup> (1), N144S <sup>a</sup> (2), M168V <sup>a</sup> (1), A128T <sup>b</sup> (2), S159F <sup>b</sup> (3), S159Y <sup>b</sup> (2), K160T <sup>b</sup> (2), V186G <sup>b</sup> (5), Q197R <sup>b</sup> (1), D53N <sup>c</sup> (1), Q311H <sup>c</sup> (2), <b>N171H<sup>d</sup> (1)</b> , 219S <sup>d</sup> (5), D225N <sup>d</sup> (3), <b>S262N<sup>e</sup> (1)</b> , <b>V88I<sup>e</sup> (1)</b>                                                                                    |
|                                     | No data (N=1)            | Same as above                                                                                                                                                                                                                                                                                                                                                                                                                                                                                                                                                                                                | -                                                                                                                                                                                                                                                                                                                                                                                                         | -                                                                                                                                                                                                                                                                                                                                                                                  | -                                                                                                                                                                                                                                                                                                                                                                                     | -                                                                                                                                                                                                                                                                                                                                                                    | -                                                                                                                                                                                                                                                                  | -                                                                                                                                                                                                                                                                                                                                                                                                                                                                                                                                                                                                  |
|                                     | HA not recovered (N= 19) | -                                                                                                                                                                                                                                                                                                                                                                                                                                                                                                                                                                                                            | -                                                                                                                                                                                                                                                                                                                                                                                                         | -                                                                                                                                                                                                                                                                                                                                                                                  | -                                                                                                                                                                                                                                                                                                                                                                                     | -                                                                                                                                                                                                                                                                                                                                                                    | -                                                                                                                                                                                                                                                                  | -                                                                                                                                                                                                                                                                                                                                                                                                                                                                                                                                                                                                  |
| <b>Antigenic drift by age group</b> |                          |                                                                                                                                                                                                                                                                                                                                                                                                                                                                                                                                                                                                              |                                                                                                                                                                                                                                                                                                                                                                                                           |                                                                                                                                                                                                                                                                                                                                                                                    |                                                                                                                                                                                                                                                                                                                                                                                       |                                                                                                                                                                                                                                                                                                                                                                      |                                                                                                                                                                                                                                                                    |                                                                                                                                                                                                                                                                                                                                                                                                                                                                                                                                                                                                    |
| Age [years]                         | 1 month-<2 (N=29)        | K144N <sup>a</sup> (4), N145S <sup>a</sup> (2), A198S <sup>b</sup> (2), N312S <sup>c</sup> (2), T212A <sup>d</sup> (4), S214I <sup>d</sup> (4), K62E <sup>e</sup> (4)                                                                                                                                                                                                                                                                                                                                                                                                                                        | <b>I140K<sup>a</sup> (1)</b> , R142G <sup>a</sup> (2), K144N <sup>a</sup> (7), N145S <sup>a</sup> (4), T128A <sup>b</sup> (2), A198S <sup>b</sup> (4), S45N <sup>c</sup> (5), T48I <sup>c</sup> (2), N278K <sup>c</sup> (2), N312S <sup>c</sup> (4), T212A <sup>d</sup> (7), S214V <sup>d</sup> (2), S214I <sup>d</sup> (5), K62E <sup>e</sup> (7), S262N <sup>e</sup> (2)                                | <b>I140K<sup>a</sup> (1)</b> , R142G <sup>a</sup> (2), N145S <sup>a</sup> (4), T128A <sup>b</sup> (2), Q156H <sup>b</sup> (7), V186G <sup>b</sup> (7), S198A <sup>b</sup> (3), N45S <sup>c</sup> (2), I48T <sup>c</sup> (5), N278K <sup>c</sup> (2), S312N <sup>c</sup> (3), I214V <sup>d</sup> (2), Y219S <sup>d</sup> (7), S262N <sup>e</sup> (2)                                | <b>S124N<sup>a</sup> (1)</b> , R142G <sup>a</sup> (4), N145S <sup>a</sup> (4), T128A <sup>b</sup> (4), Q156H <sup>b</sup> (4), <b>L157S<sup>b</sup> (1)</b> , V186G <sup>b</sup> (4), <b>Q197H<sup>b</sup> (1)</b> , D53N <sup>c</sup> (1), N278K <sup>c</sup> (4), <b>V297I<sup>c</sup> (1)</b> , <b>I214T<sup>d</sup> (1)</b> , Y219S <sup>d</sup> (4), <b>S91G<sup>e</sup> (1)</b> | <b>S124N<sup>a</sup> (1)</b> , R142G <sup>a</sup> (4), N145S <sup>a</sup> (4), N128A <sup>b</sup> (4), <b>L157S<sup>b</sup> (1)</b> , V186G <sup>b</sup> (4), <b>Q197H<sup>b</sup> (1)</b> , P198S <sup>b</sup> (4), <b>D53N<sup>c</sup> (1)</b> , <b>V297I<sup>c</sup> (1)</b> , <b>I214T<sup>d</sup> (1)</b> , F219S <sup>d</sup> (4), <b>S91G<sup>e</sup> (1)</b> | <b>A138S<sup>a</sup> (1)</b> , I140K <sup>a</sup> (1), R142G <sup>a</sup> (5), N145S <sup>a</sup> (5), N128A <sup>b</sup> (5), <b>F159S<sup>b</sup> (1)</b> , V186G <sup>b</sup> (5), P198S <sup>b</sup> (5), F219S <sup>d</sup> (5), <b>N225D<sup>d</sup> (1)</b> | <b>S124R<sup>a</sup> (1)</b> , S138A <sup>a</sup> (2), R140I <sup>a</sup> (2), G142R <sup>a</sup> (2), N144S <sup>a</sup> (2), M168V <sup>a</sup> (1), A128T <sup>b</sup> (2), S159Y <sup>b</sup> (2), K160T <sup>b</sup> (2), V186G <sup>b</sup> (2), Q311H <sup>c</sup> (2), 219S <sup>d</sup> (2), <b>S91N<sup>e</sup> (1)</b> , <b>S265G<sup>e</sup> (1)</b>                                                                                                                                                                                                                                   |
|                                     | 2-<5 (N=41)              | <b>A138S<sup>a</sup> (1)</b> , <b>I140K<sup>a</sup> (1)</b> , <b>R142G<sup>a</sup> (1)</b> , K144N <sup>a</sup> (9), N145S <sup>a</sup> (7), <b>T128A<sup>b</sup> (1)</b> , <b>F159S<sup>b</sup> (1)</b> , I192V <sup>b</sup> (2), <b>A196T<sup>b</sup> (1)</b> , A198S <sup>b</sup> (6), <b>A198P<sup>b</sup> (1)</b> , <b>S45N<sup>c</sup> (3)</b> , <b>T48I<sup>c</sup> (1)</b> , <b>N278K<sup>c</sup> (1)</b> , N312S <sup>c</sup> (6), T212A <sup>d</sup> (9), S214I <sup>d</sup> (9), <b>N225D<sup>d</sup> (1)</b> , <b>I242V<sup>d</sup> (1)</b> , K62E <sup>e</sup> (9), <b>K83E<sup>e</sup> (1)</b> | <b>S124N<sup>a</sup> (1)</b> , R142G <sup>a</sup> (3), K144N <sup>a</sup> (7), N145S <sup>a</sup> (4), T128A <sup>b</sup> (3), A198S <sup>b</sup> (4), S45N <sup>c</sup> (6), T48I <sup>c</sup> (3), N278K <sup>c</sup> (3), N312S <sup>c</sup> (4), T212A <sup>d</sup> (7), S214V <sup>d</sup> (1), S214I <sup>d</sup> (6), <b>I242V<sup>d</sup> (1)</b> , K62E <sup>e</sup> (7), S262N <sup>e</sup> (1) | <b>S124N<sup>a</sup> (1)</b> , R142G <sup>a</sup> (3), N145S <sup>a</sup> (4), T128A <sup>b</sup> (3), Q156H <sup>b</sup> (7), V186G <sup>b</sup> (7), S198A <sup>b</sup> (3), N45S <sup>c</sup> (1), I48T <sup>c</sup> (4), N278K <sup>c</sup> (3), S312N <sup>c</sup> (3), I214V <sup>d</sup> (1), Y219S <sup>d</sup> (7), <b>I242V<sup>d</sup> (1)</b> , S262N <sup>e</sup> (1) | <b>N122S<sup>a</sup> (1)</b> , <b>I140K<sup>a</sup> (1)</b> , R142G <sup>a</sup> (2), N145S <sup>a</sup> (2), T128A <sup>b</sup> (2), Q156H <sup>b</sup> (2), V186G <sup>b</sup> (2), N278K <sup>c</sup> (2), Y219S <sup>d</sup> (2)                                                                                                                                                  | <b>N122S<sup>a</sup> (1)</b> , <b>I140K<sup>a</sup> (1)</b> , R142G <sup>a</sup> (2), N145S <sup>a</sup> (2), N128A <sup>b</sup> (2), V186G <sup>b</sup> (2), P198S <sup>b</sup> (2), F219S <sup>d</sup> (2)                                                                                                                                                         | I140K <sup>a</sup> (4), R142G <sup>a</sup> (5), N145S <sup>a</sup> (5), N128A <sup>b</sup> (5), V186G <sup>b</sup> (5), P198S <sup>b</sup> (4), F219S <sup>d</sup> (5), <b>N121D<sup>d</sup> (1)</b> , <b>E62K<sup>e</sup> (1)</b>                                 | <b>S124N<sup>a</sup> (1)</b> , S138A <sup>a</sup> (7), R140K <sup>a</sup> (5), R140I <sup>a</sup> (3), G142K <sup>a</sup> (1), N144S <sup>a</sup> (1), <b>N144K<sup>a</sup> (1)</b> , A128T <sup>b</sup> (1), <b>L157S<sup>b</sup> (1)</b> , S159F <sup>b</sup> (6), S159Y <sup>b</sup> (1), K160T <sup>b</sup> (1), V186G <sup>b</sup> (8), <b>Q197R<sup>b</sup> (1)</b> , D53N <sup>c</sup> (2), Q311H <sup>c</sup> (1), <b>I214T<sup>d</sup> (1)</b> , <b>N171H<sup>d</sup> (1)</b> , 219S <sup>d</sup> (8), D225N <sup>d</sup> (6), <b>S262N<sup>e</sup> (1)</b> , <b>V88I<sup>e</sup> (1)</b> |
|                                     | 5-<15 (N=18)             | K144N <sup>a</sup> (5), N145S <sup>a</sup> (4), I192V <sup>b</sup> (1), A198S <sup>b</sup> (4), G275S <sup>c</sup> (1), N312S <sup>c</sup> (4), T212A <sup>d</sup> (5), S214I <sup>d</sup> (5), K62E <sup>e</sup> (5)                                                                                                                                                                                                                                                                                                                                                                                        | K144N <sup>a</sup> (2), S45N <sup>c</sup> (2), N121K <sup>d</sup> (1), T212A <sup>d</sup> (2), S214I <sup>d</sup> (2), K62E <sup>e</sup> (2)                                                                                                                                                                                                                                                              | Q156H <sup>b</sup> (2), V186G <sup>b</sup> (2), S198A <sup>b</sup> (2), I48T <sup>c</sup> (2), S312N <sup>c</sup> (2), N121K <sup>d</sup> (1), Y219S <sup>d</sup> (2)                                                                                                                                                                                                              | -                                                                                                                                                                                                                                                                                                                                                                                     | -                                                                                                                                                                                                                                                                                                                                                                    | I140K <sup>a</sup> (1), R142G <sup>a</sup> (1), N145S <sup>a</sup> (1), N128A <sup>b</sup> (1), V186G <sup>b</sup> (1), P198S <sup>b</sup> (1), F219S <sup>d</sup> (1)                                                                                             | S138A <sup>a</sup> (2), R140K <sup>a</sup> (1), R140I <sup>a</sup> (1), G142K <sup>a</sup> (1), N144S <sup>a</sup> (1), A128T <sup>b</sup> (1), S159F <sup>b</sup> (1), S159Y <sup>b</sup> (1), K160T <sup>b</sup> (1), V186G <sup>b</sup> (2), Q197R <sup>b</sup> (1), D53N <sup>c</sup> (1),                                                                                                                                                                                                                                                                                                     |

|                                      |                          |                                                                                                                                                                                                                                                                                                                                                                                                                                                                                                                                                                          |                                                                                                                                                                                                                                                                                                                                                                                                                             |                                                                                                                                                                                                                                                                                                                                                                                                           |                                                                                                                                                                                                                                                                                                                                  |                                                                                                                                                                                                                                                                                                          |                                                                                                                                                                                                                                            |                                                                                                                                                                                                                                                                                                                                                                                                                                                     |
|--------------------------------------|--------------------------|--------------------------------------------------------------------------------------------------------------------------------------------------------------------------------------------------------------------------------------------------------------------------------------------------------------------------------------------------------------------------------------------------------------------------------------------------------------------------------------------------------------------------------------------------------------------------|-----------------------------------------------------------------------------------------------------------------------------------------------------------------------------------------------------------------------------------------------------------------------------------------------------------------------------------------------------------------------------------------------------------------------------|-----------------------------------------------------------------------------------------------------------------------------------------------------------------------------------------------------------------------------------------------------------------------------------------------------------------------------------------------------------------------------------------------------------|----------------------------------------------------------------------------------------------------------------------------------------------------------------------------------------------------------------------------------------------------------------------------------------------------------------------------------|----------------------------------------------------------------------------------------------------------------------------------------------------------------------------------------------------------------------------------------------------------------------------------------------------------|--------------------------------------------------------------------------------------------------------------------------------------------------------------------------------------------------------------------------------------------|-----------------------------------------------------------------------------------------------------------------------------------------------------------------------------------------------------------------------------------------------------------------------------------------------------------------------------------------------------------------------------------------------------------------------------------------------------|
|                                      |                          |                                                                                                                                                                                                                                                                                                                                                                                                                                                                                                                                                                          |                                                                                                                                                                                                                                                                                                                                                                                                                             |                                                                                                                                                                                                                                                                                                                                                                                                           |                                                                                                                                                                                                                                                                                                                                  |                                                                                                                                                                                                                                                                                                          |                                                                                                                                                                                                                                            | Q311H <sup>c</sup> (1), 219S <sup>d</sup> (2), D225N <sup>d</sup> (1)                                                                                                                                                                                                                                                                                                                                                                               |
|                                      | 15-<50 (N=9)             | K144N <sup>a</sup> (5), N145S <sup>a</sup> (2), A198S <sup>b</sup> (2), S45N <sup>c</sup> (3), N312S <sup>c</sup> (2), T212A <sup>d</sup> (5), S214I <sup>d</sup> (5), K62E <sup>e</sup> (5)                                                                                                                                                                                                                                                                                                                                                                             | -                                                                                                                                                                                                                                                                                                                                                                                                                           | -                                                                                                                                                                                                                                                                                                                                                                                                         | -                                                                                                                                                                                                                                                                                                                                | -                                                                                                                                                                                                                                                                                                        | -                                                                                                                                                                                                                                          | S138A <sup>a</sup> (2), R140I <sup>a</sup> (2), G142R <sup>a</sup> (2), N144S <sup>a</sup> (2), M168V <sup>a</sup> (1), A128T <sup>b</sup> (2), S159Y <sup>b</sup> (2), K160T <sup>b</sup> (2), V186G <sup>b</sup> (2), Q311H <sup>c</sup> (2), 219S <sup>d</sup> (2)                                                                                                                                                                               |
|                                      | 50-<65 (N=1)             | K144N <sup>a</sup> (1), N145S <sup>a</sup> (1), A198S <sup>b</sup> (1), N312S <sup>c</sup> (1), T212A <sup>d</sup> (1), S214I <sup>d</sup> (1), K62E <sup>e</sup> (1)                                                                                                                                                                                                                                                                                                                                                                                                    | -                                                                                                                                                                                                                                                                                                                                                                                                                           | -                                                                                                                                                                                                                                                                                                                                                                                                         | -                                                                                                                                                                                                                                                                                                                                | -                                                                                                                                                                                                                                                                                                        | -                                                                                                                                                                                                                                          | -                                                                                                                                                                                                                                                                                                                                                                                                                                                   |
|                                      | ≥ 65 (N=0)               | -                                                                                                                                                                                                                                                                                                                                                                                                                                                                                                                                                                        | -                                                                                                                                                                                                                                                                                                                                                                                                                           | -                                                                                                                                                                                                                                                                                                                                                                                                         | -                                                                                                                                                                                                                                                                                                                                | -                                                                                                                                                                                                                                                                                                        | -                                                                                                                                                                                                                                          | -                                                                                                                                                                                                                                                                                                                                                                                                                                                   |
|                                      | No data (N=1)            | Same as above                                                                                                                                                                                                                                                                                                                                                                                                                                                                                                                                                            | -                                                                                                                                                                                                                                                                                                                                                                                                                           | -                                                                                                                                                                                                                                                                                                                                                                                                         | -                                                                                                                                                                                                                                                                                                                                | -                                                                                                                                                                                                                                                                                                        | -                                                                                                                                                                                                                                          | -                                                                                                                                                                                                                                                                                                                                                                                                                                                   |
|                                      | HA not recovered (N= 19) | -                                                                                                                                                                                                                                                                                                                                                                                                                                                                                                                                                                        | -                                                                                                                                                                                                                                                                                                                                                                                                                           | -                                                                                                                                                                                                                                                                                                                                                                                                         | -                                                                                                                                                                                                                                                                                                                                | -                                                                                                                                                                                                                                                                                                        | -                                                                                                                                                                                                                                          | -                                                                                                                                                                                                                                                                                                                                                                                                                                                   |
| <b>Antigenic drift by age region</b> |                          |                                                                                                                                                                                                                                                                                                                                                                                                                                                                                                                                                                          |                                                                                                                                                                                                                                                                                                                                                                                                                             |                                                                                                                                                                                                                                                                                                                                                                                                           |                                                                                                                                                                                                                                                                                                                                  |                                                                                                                                                                                                                                                                                                          |                                                                                                                                                                                                                                            |                                                                                                                                                                                                                                                                                                                                                                                                                                                     |
| Region                               | Central (N=80)           | A138S <sup>a</sup> (1), I140K <sup>a</sup> (1), R142G <sup>a</sup> (1), K144N <sup>a</sup> (25), N145S <sup>a</sup> (16), T128A <sup>b</sup> (1), F159S <sup>b</sup> (1), I192V <sup>b</sup> (3), A196T <sup>b</sup> (1), A198S <sup>b</sup> (15), A198P <sup>b</sup> (1), S45N <sup>c</sup> (7), T48I <sup>c</sup> (1), D53N <sup>c</sup> (1), G275S <sup>c</sup> (2), N278K <sup>c</sup> (1), N312S <sup>c</sup> (15), T212A <sup>d</sup> (25), S214I <sup>d</sup> (25), N225D <sup>d</sup> (1), I242V <sup>d</sup> (1), K62E <sup>e</sup> (25), K83E <sup>e</sup> (1) | <b>S124N<sup>a</sup> (1)</b> , R142G <sup>a</sup> (4), K144N <sup>a</sup> (13), N145S <sup>a</sup> (7), T128A <sup>b</sup> (4), A198S <sup>b</sup> (7), S45N <sup>c</sup> (10), T48I <sup>c</sup> (4), N278K <sup>c</sup> (4), N312S <sup>c</sup> (7), T212A <sup>d</sup> (13), <b>S214V<sup>d</sup> (3)</b> , S214I <sup>d</sup> (10), <b>I242V<sup>d</sup> (1)</b> , K62E <sup>e</sup> (13), <b>S262N<sup>e</sup> (3)</b> | <b>S124N<sup>a</sup> (1)</b> , R142G <sup>a</sup> (4), N145S <sup>a</sup> (7), T128A <sup>b</sup> (4), Q156H <sup>b</sup> (13), V186G <sup>b</sup> (13), S198A <sup>b</sup> (6), <b>N45S<sup>c</sup> (3)</b> , I48T <sup>c</sup> (9), N278K <sup>c</sup> (4), S312N <sup>c</sup> (6), <b>I214V<sup>d</sup> (3)</b> , Y219S <sup>d</sup> (13), <b>I242V<sup>d</sup> (1)</b> , <b>S262N<sup>e</sup> (3)</b> | <b>N122S<sup>a</sup> (1)</b> , <b>I140K<sup>a</sup> (1)</b> , R142G <sup>a</sup> (5), N145S <sup>a</sup> (5), T128A <sup>b</sup> (5), Q156H <sup>b</sup> (5), V186G <sup>b</sup> (5), <b>Q197H<sup>b</sup> (1)</b> , N278K <sup>c</sup> (5), Y219S <sup>d</sup> (5), <b>S91G<sup>e</sup> (1)</b>                                 | N122S <sup>a</sup> (1), I140K <sup>a</sup> (1), R142G <sup>a</sup> (5), N145S <sup>a</sup> (5), N128A <sup>b</sup> (5), V186G <sup>b</sup> (5), <b>Q197H<sup>b</sup> (1)</b> , P198S <sup>b</sup> (5), F219S <sup>d</sup> (5), <b>S91G<sup>e</sup> (1)</b>                                               | <b>I140K<sup>a</sup> (6)</b> , R142G <sup>a</sup> (7), N145S <sup>a</sup> (7), N128A <sup>b</sup> (7), V186G <sup>b</sup> (7), P198S <sup>b</sup> (6), F219S <sup>d</sup> (7), <b>N121D<sup>d</sup> (1)</b> , <b>E62K<sup>e</sup> (1)</b>  | S138A <sup>a</sup> (6), R140K <sup>a</sup> (3), R140I <sup>a</sup> (3), G142R <sup>a</sup> (1), G142K <sup>a</sup> (2), N144S <sup>a</sup> (3), M168V <sup>a</sup> (1), A128T <sup>b</sup> (3), S159F <sup>b</sup> (3), S159Y <sup>b</sup> (3), K160T <sup>b</sup> (3), V186G <sup>b</sup> (6), <b>Q197R<sup>b</sup> (2)</b> , D53N <sup>c</sup> (2), Q311H <sup>c</sup> (3), 219S <sup>d</sup> (6), D225N <sup>d</sup> (3)                         |
|                                      | Eastern (N=7)            | -                                                                                                                                                                                                                                                                                                                                                                                                                                                                                                                                                                        | -                                                                                                                                                                                                                                                                                                                                                                                                                           | -                                                                                                                                                                                                                                                                                                                                                                                                         | <b>S124N<sup>a</sup> (1)</b> , R142G <sup>a</sup> (1), N145S <sup>a</sup> (1), T128A <sup>b</sup> (1), Q156H <sup>b</sup> (1), <b>L157S<sup>b</sup> (1)</b> , V186G <sup>b</sup> (1), <b>D53N<sup>c</sup> (1)</b> , N278K <sup>c</sup> (1), <b>V297I<sup>c</sup> (1)</b> , <b>I214T<sup>d</sup> (1)</b> , Y219S <sup>d</sup> (1) | <b>S124N<sup>a</sup> (1)</b> , R142G <sup>a</sup> (1), N145S <sup>a</sup> (1), N128A <sup>b</sup> (1), <b>L157S<sup>b</sup> (1)</b> , V186G <sup>b</sup> (1), P198S <sup>b</sup> (1), <b>D53N<sup>c</sup> (1)</b> , <b>V297I<sup>c</sup> (1)</b> , <b>I214T<sup>d</sup> (1)</b> , F219S <sup>d</sup> (1) | -                                                                                                                                                                                                                                          | <b>S124N<sup>a</sup> (1)</b> , S138A <sup>a</sup> (4), R140K <sup>a</sup> (2), R140I <sup>a</sup> (2), G142R <sup>a</sup> (1), N144S <sup>a</sup> (1), A128T <sup>b</sup> (1), L157S <sup>b</sup> (1), S159F <sup>b</sup> (3), S159Y <sup>b</sup> (1), K160T <sup>b</sup> (1), V186G <sup>b</sup> (4), D53N <sup>c</sup> (1), Q311H <sup>c</sup> (1), I214T <sup>d</sup> (1), N171H <sup>d</sup> (1), 219S <sup>d</sup> (4), D225N <sup>d</sup> (3) |
|                                      | Northwest (N=3)          | -                                                                                                                                                                                                                                                                                                                                                                                                                                                                                                                                                                        | K144N <sup>a</sup> (2), S45N <sup>c</sup> (2), N121K <sup>d</sup> (1), T212A <sup>d</sup> (2), S214I <sup>d</sup> (2), K62E <sup>e</sup> (2)                                                                                                                                                                                                                                                                                | Q156H <sup>b</sup> (2), V186G <sup>b</sup> (2), S198A <sup>b</sup> (2), I48T <sup>c</sup> (2), S312N <sup>c</sup> (2), <b>N121K<sup>d</sup> (1)</b> , Y219S <sup>d</sup> (2)                                                                                                                                                                                                                              | -                                                                                                                                                                                                                                                                                                                                | -                                                                                                                                                                                                                                                                                                        | <b>A138S<sup>a</sup> (1)</b> , R142G <sup>a</sup> (1), N145S <sup>a</sup> (1), N128A <sup>b</sup> (1), <b>F159S<sup>b</sup> (1)</b> , V186G <sup>b</sup> (1), P198S <sup>b</sup> (1), F219S <sup>d</sup> (1), <b>N225D<sup>d</sup> (1)</b> | -                                                                                                                                                                                                                                                                                                                                                                                                                                                   |

|                          |   |                                                                                                                                                                                                                                                                                                                     |                                                                                                                                                                                                |   |   |                                                                                                                                                |                                                                                                                                                                                                                                                                                                                                                                                                                                                                                             |
|--------------------------|---|---------------------------------------------------------------------------------------------------------------------------------------------------------------------------------------------------------------------------------------------------------------------------------------------------------------------|------------------------------------------------------------------------------------------------------------------------------------------------------------------------------------------------|---|---|------------------------------------------------------------------------------------------------------------------------------------------------|---------------------------------------------------------------------------------------------------------------------------------------------------------------------------------------------------------------------------------------------------------------------------------------------------------------------------------------------------------------------------------------------------------------------------------------------------------------------------------------------|
| Western (N=9)            | - | I140K <sup>a</sup> (1), R142G <sup>a</sup> (1), K144N <sup>a</sup> (1), N145S <sup>a</sup> (1), T128A <sup>b</sup> (1), A198S <sup>b</sup> (1), S45N <sup>c</sup> (1), T48I <sup>c</sup> (1), N278K <sup>c</sup> (1), N312S <sup>c</sup> (1), T212A <sup>d</sup> (1), S214I <sup>d</sup> (1), K62E <sup>e</sup> (1) | I140K <sup>a</sup> (1), R142G <sup>a</sup> (1), N145S <sup>a</sup> (1), T128A <sup>b</sup> (1), Q156H <sup>b</sup> (1), V186G <sup>b</sup> (1), N278K <sup>c</sup> (1), Y219S <sup>d</sup> (1) | - | - | R142G <sup>a</sup> (3), N145S <sup>a</sup> (3), N128A <sup>b</sup> (3), V186G <sup>b</sup> (3), P198S <sup>b</sup> (3), F219S <sup>d</sup> (3) | S124R <sup>a</sup> (1), S138A <sup>a</sup> (3), R140K <sup>a</sup> (1), R140I <sup>a</sup> (3), G142R <sup>a</sup> (1), N144S <sup>a</sup> (2), N144K <sup>a</sup> (1), M168V <sup>a</sup> (1), A128T <sup>b</sup> (2), S159F <sup>b</sup> (1), S159Y <sup>b</sup> (2), K160T <sup>b</sup> (2), V186G <sup>b</sup> (4), Q311H <sup>c</sup> (2), 219S <sup>d</sup> (4), D225N <sup>d</sup> (1), V88I <sup>e</sup> (1), S91N <sup>e</sup> (1), S262N <sup>e</sup> (1), S265G <sup>e</sup> (1) |
| HA not recovered (N= 19) | - | -                                                                                                                                                                                                                                                                                                                   | -                                                                                                                                                                                              | - | - | -                                                                                                                                              | -                                                                                                                                                                                                                                                                                                                                                                                                                                                                                           |

SH= Southern hemisphere vaccine. NH= Northern hemisphere vaccine. SNH= vaccine shared for both Southern and Northern hemispheres. A(H3N2) HA1 antigenic sites are A=a, B=b, C=c, D=d, and E=e as described by Wiley and Skehel, 1987. The frequency of an amino acid substitution observed at a given antigenic site in Uganda HA1 proteins is reported as (n). The substitutions in **BOLD** are unique between subgroups relative to the vaccine of a given season. Amino acid substitutions against the NH vaccine strains are coloured **brown** for visualization purposes only. Recommended vaccines for each influenza season are adopted from the World Health Organization (WHO), <https://www.who.int/teams/global-influenza-programme/vaccines/who-recommendations>.

**Supplementary Table 4: Antigenic drift among successfully sequenced Uganda A(H3N2) viruses (N=99) from 2010-2020 season vaccine viruses, recommended for the Southern (SH), Northern (NH) hemisphere or both (SNH), by cases, gender, age, and geographical region. Hemagglutinin (HA) sequences were not recovered for 19 H1N1pdm09 viruses.**

**Supplementary Table 4 (continued): Antigenic drift observed among Uganda A(H3N2) viruses per case, gender, age group, and geographical region per year**

| Season                         |             | 2016-2017 (n=27)                                                                                                                                                                                                                                                                                                                                                                                                                                                                                                                                                                                                                                                                                                                                                                          | 2018 (Only 2017 viruses analysed, n=13)                                                                                                                                                                                                                                                                                                                                                                                                                                                                                                                                                                                                                                                                                                     | 2019 (Only 2017 viruses analysed, n=13)                                                                                                                                                                                                                                                                                                                                                                                                                                                                                                                                                                                                                                                                                                                                                                           | 2020 (Only 2017 viruses analysed, n=13)                                                                                                                                                                                                                                                                                                                                                                                                                                                                                                                                                                                                                                                                                                                                                       |                                                                                                                                                                                                                                                                                                                                                                                                                                                                                                                                                                                                                                                                                                                                                  |                                                                                                                                                                                                                                                                                                                                                                                                                                                                                                                                                                                                                                                                                                                                                                                                  |
|--------------------------------|-------------|-------------------------------------------------------------------------------------------------------------------------------------------------------------------------------------------------------------------------------------------------------------------------------------------------------------------------------------------------------------------------------------------------------------------------------------------------------------------------------------------------------------------------------------------------------------------------------------------------------------------------------------------------------------------------------------------------------------------------------------------------------------------------------------------|---------------------------------------------------------------------------------------------------------------------------------------------------------------------------------------------------------------------------------------------------------------------------------------------------------------------------------------------------------------------------------------------------------------------------------------------------------------------------------------------------------------------------------------------------------------------------------------------------------------------------------------------------------------------------------------------------------------------------------------------|-------------------------------------------------------------------------------------------------------------------------------------------------------------------------------------------------------------------------------------------------------------------------------------------------------------------------------------------------------------------------------------------------------------------------------------------------------------------------------------------------------------------------------------------------------------------------------------------------------------------------------------------------------------------------------------------------------------------------------------------------------------------------------------------------------------------|-----------------------------------------------------------------------------------------------------------------------------------------------------------------------------------------------------------------------------------------------------------------------------------------------------------------------------------------------------------------------------------------------------------------------------------------------------------------------------------------------------------------------------------------------------------------------------------------------------------------------------------------------------------------------------------------------------------------------------------------------------------------------------------------------|--------------------------------------------------------------------------------------------------------------------------------------------------------------------------------------------------------------------------------------------------------------------------------------------------------------------------------------------------------------------------------------------------------------------------------------------------------------------------------------------------------------------------------------------------------------------------------------------------------------------------------------------------------------------------------------------------------------------------------------------------|--------------------------------------------------------------------------------------------------------------------------------------------------------------------------------------------------------------------------------------------------------------------------------------------------------------------------------------------------------------------------------------------------------------------------------------------------------------------------------------------------------------------------------------------------------------------------------------------------------------------------------------------------------------------------------------------------------------------------------------------------------------------------------------------------|
| Vaccine                        |             | A/Hong Kong/4801/2014: E5/E3, clade 3C.2a (SNH)                                                                                                                                                                                                                                                                                                                                                                                                                                                                                                                                                                                                                                                                                                                                           | A/Singapore/INFIMH-16-0019/2016: E5, Clade 3C.2a1 (SNH)                                                                                                                                                                                                                                                                                                                                                                                                                                                                                                                                                                                                                                                                                     | A/Switzerland/8060/2017: E5/E2, Clade 3C.2a2 (SH)                                                                                                                                                                                                                                                                                                                                                                                                                                                                                                                                                                                                                                                                                                                                                                 | A/Kansas/14/2017: E5, Clade 3C.3a (NH)                                                                                                                                                                                                                                                                                                                                                                                                                                                                                                                                                                                                                                                                                                                                                        | A/South Australia/34/2019: E5, Clade 3C.2a1b (SH)                                                                                                                                                                                                                                                                                                                                                                                                                                                                                                                                                                                                                                                                                                | A/Hong Kong/2671/2019: E7, Clade 3C.2a1b (NH)                                                                                                                                                                                                                                                                                                                                                                                                                                                                                                                                                                                                                                                                                                                                                    |
| <b>Antigenic drift by case</b> |             |                                                                                                                                                                                                                                                                                                                                                                                                                                                                                                                                                                                                                                                                                                                                                                                           |                                                                                                                                                                                                                                                                                                                                                                                                                                                                                                                                                                                                                                                                                                                                             |                                                                                                                                                                                                                                                                                                                                                                                                                                                                                                                                                                                                                                                                                                                                                                                                                   |                                                                                                                                                                                                                                                                                                                                                                                                                                                                                                                                                                                                                                                                                                                                                                                               |                                                                                                                                                                                                                                                                                                                                                                                                                                                                                                                                                                                                                                                                                                                                                  |                                                                                                                                                                                                                                                                                                                                                                                                                                                                                                                                                                                                                                                                                                                                                                                                  |
| Case                           | ILI (N= 65) | N122D <sup>a</sup> (3), A138S <sup>a</sup> (6), I140K <sup>a</sup> (9), R142G <sup>a</sup> (9), R142K <sup>a</sup> (3), S144N <sup>a</sup> (11), S144K <sup>a</sup> (1), S145N <sup>a</sup> (2), S146G <sup>a</sup> (1), T128A <sup>b</sup> (9), T135K <sup>b</sup> (2), H156Q <sup>b</sup> (1), Y159F <sup>b</sup> (5), Y159S <sup>b</sup> (6), K160T <sup>b</sup> (8), P194L <sup>b</sup> (20), A196T <sup>b</sup> (2), Q197R <sup>b</sup> (3), S198A <sup>b</sup> (2), S198P <sup>b</sup> (6), I48T <sup>c</sup> (2), D53E <sup>c</sup> (2), D53N <sup>c</sup> (3), G275S <sup>c</sup> (1), K276R <sup>c</sup> (1), K278N <sup>c</sup> (2), H311Q <sup>c</sup> (14), S312N <sup>c</sup> (8), S96N <sup>d</sup> (19), N121K <sup>d</sup> (6), N171K <sup>d</sup> (5), 203T <sup>d</sup> | N122D <sup>a</sup> (2), A138S <sup>a</sup> (5), I140K <sup>a</sup> (5), G142R <sup>a</sup> (6), S144N <sup>a</sup> (7), S145N <sup>a</sup> (2), S146G <sup>a</sup> (1), T128A <sup>b</sup> (5), T135K <sup>b</sup> (2), H156Q <sup>b</sup> (1), Y159F <sup>b</sup> (2), Y159S <sup>b</sup> (5), K160T <sup>b</sup> (4), P194L <sup>b</sup> (11), A196T <sup>b</sup> (2), S198A <sup>b</sup> (2), S198P <sup>b</sup> (5), I48T <sup>c</sup> (2), D53E <sup>c</sup> (1), G275S <sup>c</sup> (1), K276R <sup>c</sup> (1), K278N <sup>c</sup> (2), H311Q <sup>c</sup> (9), S312N <sup>c</sup> (7), K121N <sup>d</sup> (7), K171N <sup>d</sup> (7), I214T <sup>d</sup> (1), 225N <sup>d</sup> (2), 225D <sup>d</sup> (9), Q75H <sup>e</sup> (1), | N122D <sup>a</sup> (2), K131T <sup>a</sup> (11), A138S <sup>a</sup> (5), I140K <sup>a</sup> (5), K142R <sup>a</sup> (6), K142G <sup>a</sup> (5), S144N <sup>a</sup> (7), S145N <sup>a</sup> (2), S146G <sup>a</sup> (1), T128A <sup>b</sup> (5), T135K <sup>b</sup> (2), H156Q <sup>b</sup> (1), Y159F <sup>b</sup> (2), Y159S <sup>b</sup> (5), K160T <sup>b</sup> (4), P194L <sup>b</sup> (11), A196T <sup>b</sup> (2), S198A <sup>b</sup> (2), S198P <sup>b</sup> (5), I48T <sup>c</sup> (2), D53E <sup>c</sup> (1), G275S <sup>c</sup> (1), K276R <sup>c</sup> (1), K278N <sup>c</sup> (2), 300I <sup>c</sup> (11), H311Q <sup>c</sup> (9), S312N <sup>c</sup> (7), S96N <sup>d</sup> (11), N121K <sup>d</sup> (4), N171K <sup>d</sup> (4), I214T <sup>d</sup> (1), D225N <sup>d</sup> (2), Q75H <sup>e</sup> | N122D <sup>a</sup> (2), S138A <sup>a</sup> (6), I140K <sup>a</sup> (5), G142R <sup>a</sup> (6), K144S <sup>a</sup> (4), K144N <sup>a</sup> (7), S145N <sup>a</sup> (2), S146G <sup>a</sup> (1), A128T <sup>b</sup> (6), T135K <sup>b</sup> (2), H156Q <sup>b</sup> (1), S159F <sup>b</sup> (2), S159Y <sup>b</sup> (4), K160T <sup>b</sup> (4), N190D <sup>b</sup> (4), S193F <sup>b</sup> (11), A196T <sup>b</sup> (2), S198A <sup>b</sup> (2), S198P <sup>b</sup> (5), I48T <sup>c</sup> (2), D53E <sup>c</sup> (1), G275S <sup>c</sup> (1), K276R <sup>c</sup> (1), K278N <sup>c</sup> (2), Q311H <sup>c</sup> (2), S312N <sup>c</sup> (7), N121K <sup>d</sup> (4), N171K <sup>d</sup> (4), I214T <sup>d</sup> (1), D225N <sup>d</sup> (2), 246N <sup>d</sup> (11), Q75H <sup>e</sup> (1), | N122D <sup>a</sup> (2), K131T <sup>a</sup> (11), A138S <sup>a</sup> (5), I140K <sup>a</sup> (5), G142R <sup>a</sup> (6), S144N <sup>a</sup> (7), S145N <sup>a</sup> (2), S146G <sup>a</sup> (1), T128A <sup>b</sup> (5), T135K <sup>b</sup> (2), H156Q <sup>b</sup> (1), Y159F <sup>b</sup> (2), Y159S <sup>b</sup> (5), K160T <sup>b</sup> (4), I186G <sup>b</sup> (11), A196T <sup>b</sup> (2), S198A <sup>b</sup> (2), S198P <sup>b</sup> (5), I48T <sup>c</sup> (2), D53E <sup>c</sup> (1), G275S <sup>c</sup> (1), K276R <sup>c</sup> (1), K278N <sup>c</sup> (2), Q311H <sup>c</sup> (2), S312N <sup>c</sup> (7), K121N <sup>d</sup> (7), K171N <sup>d</sup> (7), I214T <sup>d</sup> (1), F219S <sup>d</sup> (11), D225N <sup>d</sup> (2), | N122D <sup>a</sup> (2), F137S <sup>a</sup> (11), S138A <sup>a</sup> (6), I140K <sup>a</sup> (5), G142R <sup>a</sup> (6), S144N <sup>a</sup> (7), S145N <sup>a</sup> (2), S146G <sup>a</sup> (1), A128T <sup>b</sup> (6), K135T <sup>b</sup> (9), H156Q <sup>b</sup> (1), Y159F <sup>b</sup> (2), Y159S <sup>b</sup> (5), I160T <sup>b</sup> (4), I160K <sup>b</sup> (7), V186G <sup>b</sup> (11), S193F <sup>b</sup> (11), A196T <sup>b</sup> (2), S198A <sup>b</sup> (2), S198P <sup>b</sup> (5), I48T <sup>c</sup> (2), D53E <sup>c</sup> (1), G275S <sup>c</sup> (1), K276R <sup>c</sup> (1), K278N <sup>c</sup> (2), Q311H <sup>c</sup> (2), S312N <sup>c</sup> (7), K121N <sup>d</sup> (7), S312N <sup>c</sup> (7), K121N <sup>d</sup> (7), K171N <sup>d</sup> (7), I214T <sup>d</sup> (1), |

|                                  |                          |                                                                                                                                                                                                                                                                                                                                                                                                                                                                                                                                                                                                                                                                                                                                                                                                                                                          |                                                                                                                                                                                                                                                                                                                                                                                                                                                                                                                                                                                                                                                                            |                                                                                                                                                                                                                                                                                                                                                                                                                                                                                                                                                                                                                                                                                                                                                                                                       |                                                                                                                                                                                                                                                                                                                                                                                                                                                                                                                                                                                                                                                                                                                                            |                                                                                                                                                                                                                                                                                                                                                                                                                                                                                                                                                                                                                                                                                                                            |                                                                                                                                                                                                                                                                                                                                                                                                                                                                                                                                                                                                                                                                                                                                                                                                    |
|----------------------------------|--------------------------|----------------------------------------------------------------------------------------------------------------------------------------------------------------------------------------------------------------------------------------------------------------------------------------------------------------------------------------------------------------------------------------------------------------------------------------------------------------------------------------------------------------------------------------------------------------------------------------------------------------------------------------------------------------------------------------------------------------------------------------------------------------------------------------------------------------------------------------------------------|----------------------------------------------------------------------------------------------------------------------------------------------------------------------------------------------------------------------------------------------------------------------------------------------------------------------------------------------------------------------------------------------------------------------------------------------------------------------------------------------------------------------------------------------------------------------------------------------------------------------------------------------------------------------------|-------------------------------------------------------------------------------------------------------------------------------------------------------------------------------------------------------------------------------------------------------------------------------------------------------------------------------------------------------------------------------------------------------------------------------------------------------------------------------------------------------------------------------------------------------------------------------------------------------------------------------------------------------------------------------------------------------------------------------------------------------------------------------------------------------|--------------------------------------------------------------------------------------------------------------------------------------------------------------------------------------------------------------------------------------------------------------------------------------------------------------------------------------------------------------------------------------------------------------------------------------------------------------------------------------------------------------------------------------------------------------------------------------------------------------------------------------------------------------------------------------------------------------------------------------------|----------------------------------------------------------------------------------------------------------------------------------------------------------------------------------------------------------------------------------------------------------------------------------------------------------------------------------------------------------------------------------------------------------------------------------------------------------------------------------------------------------------------------------------------------------------------------------------------------------------------------------------------------------------------------------------------------------------------------|----------------------------------------------------------------------------------------------------------------------------------------------------------------------------------------------------------------------------------------------------------------------------------------------------------------------------------------------------------------------------------------------------------------------------------------------------------------------------------------------------------------------------------------------------------------------------------------------------------------------------------------------------------------------------------------------------------------------------------------------------------------------------------------------------|
|                                  |                          | (20), <b>K207Q<sup>d</sup> (1)</b> , I214T <sup>d</sup> (1), D225N <sup>d</sup> (5), <b>E62K<sup>e</sup> (1)</b> , <b>Q75H<sup>e</sup> (2)</b> , <b>G78D<sup>e</sup> (2)</b> , <b>K83E<sup>e</sup> (1)</b> , <b>S91N<sup>e</sup> (1)</b> , K92R <sup>e</sup> (3), <b>Y94H<sup>e</sup> (2)</b> , <b>S262N<sup>e</sup> (1)</b>                                                                                                                                                                                                                                                                                                                                                                                                                                                                                                                             | <b>G78D<sup>e</sup> (2)</b> , <b>K83E<sup>e</sup> (1)</b> , K92R <sup>e</sup> (2), <b>Y94H<sup>e</sup> (2)</b>                                                                                                                                                                                                                                                                                                                                                                                                                                                                                                                                                             | (1), <b>G78D<sup>e</sup> (2)</b> , <b>K83E<sup>e</sup> (1)</b> , K92R <sup>e</sup> (2), <b>Y94H<sup>e</sup> (2)</b> , Q261R <sup>e</sup> (11)                                                                                                                                                                                                                                                                                                                                                                                                                                                                                                                                                                                                                                                         | <b>G78D<sup>e</sup> (2)</b> , <b>K83E<sup>e</sup> (1)</b> , N91S <sup>o</sup> (11), K92R <sup>e</sup> (2), <b>Y94H<sup>e</sup> (2)</b>                                                                                                                                                                                                                                                                                                                                                                                                                                                                                                                                                                                                     | G62E <sup>e</sup> (11), <b>Q75H<sup>e</sup> (1)</b> , <b>G78D<sup>e</sup> (2)</b> , <b>K83E<sup>e</sup> (1)</b> , R92K <sup>e</sup> (9), <b>Y94H<sup>e</sup> (2)</b>                                                                                                                                                                                                                                                                                                                                                                                                                                                                                                                                                       | N225D <sup>d</sup> (9), G62E <sup>e</sup> (11), <b>Q75H<sup>e</sup> (1)</b> , <b>G78D<sup>e</sup> (2)</b> , <b>K83E<sup>e</sup> (1)</b> , R92K <sup>e</sup> (9), <b>Y94H<sup>e</sup> (2)</b>                                                                                                                                                                                                                                                                                                                                                                                                                                                                                                                                                                                                       |
|                                  | SARI (N=33)              | <b>S124N<sup>a</sup> (1)</b> , R142G <sup>a</sup> (3), R142K <sup>a</sup> (2), S144N <sup>a</sup> (2), S144K <sup>a</sup> (1), T128A <sup>b</sup> (2), <b>L157S<sup>b</sup> (1)</b> , Y159F <sup>b</sup> (2), K160T <sup>b</sup> (5), P194L <sup>b</sup> (7), Q197R <sup>b</sup> (2), S198P <sup>b</sup> (1), D53N <sup>c</sup> (4), H311Q <sup>c</sup> (4), S96N <sup>d</sup> (7), N121K <sup>d</sup> (3), N171K <sup>d</sup> (2), 203T <sup>d</sup> (7), I214T <sup>d</sup> (2), D225N <sup>d</sup> (2), <b>E62G<sup>e</sup> (1)</b> , K92R <sup>e</sup> (2)                                                                                                                                                                                                                                                                                           | <b>G140R<sup>a</sup> (1)</b> , G140K <sup>a</sup> (1), K160T <sup>b</sup> (1), P194L <sup>b</sup> (2), <b>Q197R<sup>b</sup> (1)</b> , <b>D53N<sup>c</sup> (2)</b> , H311Q <sup>c</sup> (1), K121N <sup>d</sup> (1), K171N <sup>d</sup> (1), I214T <sup>d</sup> (1), 225D <sup>d</sup> (2), K92R <sup>e</sup> (1)                                                                                                                                                                                                                                                                                                                                                           | K131T <sup>a</sup> (2), K142R <sup>a</sup> (2), K160T <sup>b</sup> (2), P194L <sup>b</sup> (2), <b>Q197R<sup>b</sup> (1)</b> , <b>D53N<sup>c</sup> (2)</b> , 300I <sup>c</sup> (2), H311Q <sup>c</sup> (1), S96N <sup>d</sup> (2), N121K <sup>d</sup> (1), N171K <sup>d</sup> (1), I214T <sup>d</sup> (1), K92R <sup>e</sup> (1), Q261R <sup>e</sup> (2)                                                                                                                                                                                                                                                                                                                                                                                                                                              | S138A <sup>a</sup> (2), G142R <sup>a</sup> (1), <b>G142K<sup>a</sup> (1)</b> , K144S <sup>a</sup> (2), A128T <sup>b</sup> (2), S159Y <sup>b</sup> (2), K160T <sup>b</sup> (2), N190D <sup>b</sup> (2), S193F <sup>b</sup> (2), <b>Q197R<sup>b</sup> (1)</b> , <b>D53N<sup>c</sup> (2)</b> , Q311H <sup>c</sup> (1), N121K <sup>d</sup> (1), N171K <sup>d</sup> (1), I214T <sup>d</sup> (1), 246N <sup>d</sup> (2), N91S <sup>o</sup> (2), K92R <sup>e</sup> (1)                                                                                                                                                                                                                                                                            | K131T <sup>a</sup> (2), G142R <sup>a</sup> (1), <b>G142K<sup>a</sup> (1)</b> , K160T <sup>b</sup> (2), I186G <sup>b</sup> (2), <b>Q197R<sup>b</sup> (1)</b> , <b>D53N<sup>c</sup> (2)</b> , Q311H <sup>c</sup> (1), K121N <sup>d</sup> (1), K171N <sup>d</sup> (1), I214T <sup>d</sup> (1), F219S <sup>d</sup> (2), G62E <sup>e</sup> (2), R92K <sup>e</sup> (1)                                                                                                                                                                                                                                                                                                                                                           | F137S <sup>a</sup> (2), S138A <sup>a</sup> (2), G142R <sup>a</sup> (1), <b>G142K<sup>a</sup> (1)</b> , A128T <sup>b</sup> (2), K135T <sup>b</sup> (2), I160T <sup>b</sup> (2), V186G <sup>b</sup> (2), S193F <sup>b</sup> (2), <b>Q197R<sup>b</sup> (1)</b> , <b>D53N<sup>c</sup> (2)</b> , Q311H <sup>c</sup> (1), K121N <sup>d</sup> (1), K171N <sup>d</sup> (1), I214T <sup>d</sup> (1), N225D <sup>d</sup> (2), G62E <sup>e</sup> (2), R92K <sup>e</sup> (1)                                                                                                                                                                                                                                                                                                                                   |
|                                  | No data (N=1)            | -                                                                                                                                                                                                                                                                                                                                                                                                                                                                                                                                                                                                                                                                                                                                                                                                                                                        | -                                                                                                                                                                                                                                                                                                                                                                                                                                                                                                                                                                                                                                                                          | -                                                                                                                                                                                                                                                                                                                                                                                                                                                                                                                                                                                                                                                                                                                                                                                                     | -                                                                                                                                                                                                                                                                                                                                                                                                                                                                                                                                                                                                                                                                                                                                          | -                                                                                                                                                                                                                                                                                                                                                                                                                                                                                                                                                                                                                                                                                                                          | -                                                                                                                                                                                                                                                                                                                                                                                                                                                                                                                                                                                                                                                                                                                                                                                                  |
|                                  | HA not recovered (N= 19) | -                                                                                                                                                                                                                                                                                                                                                                                                                                                                                                                                                                                                                                                                                                                                                                                                                                                        | -                                                                                                                                                                                                                                                                                                                                                                                                                                                                                                                                                                                                                                                                          | -                                                                                                                                                                                                                                                                                                                                                                                                                                                                                                                                                                                                                                                                                                                                                                                                     | -                                                                                                                                                                                                                                                                                                                                                                                                                                                                                                                                                                                                                                                                                                                                          | -                                                                                                                                                                                                                                                                                                                                                                                                                                                                                                                                                                                                                                                                                                                          | -                                                                                                                                                                                                                                                                                                                                                                                                                                                                                                                                                                                                                                                                                                                                                                                                  |
| <b>Antigenic drift by gender</b> |                          |                                                                                                                                                                                                                                                                                                                                                                                                                                                                                                                                                                                                                                                                                                                                                                                                                                                          |                                                                                                                                                                                                                                                                                                                                                                                                                                                                                                                                                                                                                                                                            |                                                                                                                                                                                                                                                                                                                                                                                                                                                                                                                                                                                                                                                                                                                                                                                                       |                                                                                                                                                                                                                                                                                                                                                                                                                                                                                                                                                                                                                                                                                                                                            |                                                                                                                                                                                                                                                                                                                                                                                                                                                                                                                                                                                                                                                                                                                            |                                                                                                                                                                                                                                                                                                                                                                                                                                                                                                                                                                                                                                                                                                                                                                                                    |
| Gender                           | Male (N=57)              | N122D <sup>a</sup> (2), <b>S124N<sup>a</sup> (1)</b> , A138S <sup>a</sup> (3), I140K <sup>a</sup> (4), R142G <sup>a</sup> (5), R142K <sup>a</sup> (3), S144N <sup>a</sup> (5), S144K <sup>a</sup> (1), <b>S146G<sup>a</sup> (1)</b> , T128A <sup>b</sup> (5), <b>T135K<sup>b</sup> (2)</b> , <b>L157S<sup>b</sup> (1)</b> , <b>Y159F<sup>b</sup> (2)</b> , Y159S <sup>b</sup> (3), K160T <sup>b</sup> (10), P194L <sup>b</sup> (15), Q197R <sup>b</sup> (3), S198P <sup>b</sup> (4), <b>D53E<sup>c</sup> (2)</b> , D53N <sup>c</sup> (5), H311Q <sup>c</sup> (9), S312N <sup>c</sup> (3), S96N <sup>d</sup> (15), N121K <sup>d</sup> (7), N171K <sup>d</sup> (6), 203T <sup>d</sup> (15), I214T <sup>d</sup> (3), D225N <sup>d</sup> (2), <b>Q75H<sup>e</sup> (2)</b> , <b>G78D<sup>e</sup> (2)</b> , K92R <sup>e</sup> (4), <b>Y94H<sup>e</sup> (2)</b> | <b>N122D<sup>a</sup> (2)</b> , A138S <sup>a</sup> (3), I140K <sup>a</sup> (3), G142R <sup>a</sup> (5), S144N <sup>a</sup> (3), <b>S146G<sup>a</sup> (2)</b> , T128A <sup>b</sup> (3), <b>T135K<sup>b</sup> (1)</b> , Y159S <sup>b</sup> (3), K160T <sup>b</sup> (5), P194L <sup>b</sup> (8), S198P <sup>b</sup> (3), <b>D53E<sup>c</sup> (1)</b> , D53N <sup>c</sup> (1), H311Q <sup>c</sup> (6), S312N <sup>c</sup> (3), K121N <sup>d</sup> (3), K171N <sup>d</sup> (3), <b>I214T<sup>d</sup> (2)</b> , 225D <sup>d</sup> (8), <b>Q75H<sup>e</sup> (1)</b> , <b>G78D<sup>e</sup> (2)</b> , <b>K92R<sup>e</sup> (3)</b> , <b>Y94H<sup>e</sup> (2)</b>                      | <b>N122D<sup>a</sup> (2)</b> , K131T <sup>a</sup> (8), A138S <sup>a</sup> (3), I140K <sup>a</sup> (3), K142R <sup>a</sup> (5), K142G <sup>a</sup> (3), S144N <sup>a</sup> (3), <b>S146G<sup>a</sup> (1)</b> , T128A <sup>b</sup> (3), <b>T135K<sup>b</sup> (2)</b> , Y159S <sup>b</sup> (3), K160T <sup>b</sup> (5), P194L <sup>b</sup> (8), S198P <sup>b</sup> (3), <b>D53E<sup>c</sup> (1)</b> , D53N <sup>c</sup> (1), 300I <sup>c</sup> (8), H311Q <sup>c</sup> (6), S312N <sup>c</sup> (3), S96N <sup>d</sup> (8), <b>N121K<sup>d</sup> (5)</b> , <b>N171K<sup>d</sup> (5)</b> , <b>I214T<sup>d</sup> (2)</b> , <b>Q75H<sup>e</sup> (1)</b> , <b>G78D<sup>e</sup> (2)</b> , <b>K92R<sup>e</sup> (3)</b> , <b>Y94H<sup>e</sup> (2)</b> , Q261R <sup>e</sup> (8)                                   | <b>N122D<sup>a</sup> (2)</b> , S138A <sup>a</sup> (5), I140K <sup>a</sup> (3), G142R <sup>a</sup> (5), K144S <sup>a</sup> (3), K144N <sup>a</sup> (5), <b>S146G<sup>a</sup> (1)</b> , A128T <sup>b</sup> (5), <b>T135K<sup>b</sup> (2)</b> , S159Y <sup>b</sup> (5), K160T <sup>b</sup> (5), N190D <sup>b</sup> (8), S193F <sup>b</sup> (8), S198P <sup>b</sup> (3), <b>D53E<sup>c</sup> (1)</b> , D53N <sup>c</sup> (1), Q311H <sup>c</sup> (2), S312N <sup>c</sup> (3), <b>N121K<sup>d</sup> (5)</b> , <b>N171K<sup>d</sup> (5)</b> , <b>I214T<sup>d</sup> (2)</b> , 246N <sup>d</sup> (8), <b>Q75H<sup>e</sup> (1)</b> , <b>G78D<sup>e</sup> (2)</b> , N91S <sup>o</sup> (8), <b>K92R<sup>e</sup> (3)</b> , <b>Y94H<sup>e</sup> (2)</b> | <b>N122D<sup>a</sup> (2)</b> , K131T <sup>a</sup> (8), A138S <sup>a</sup> (3), I140K <sup>a</sup> (3), G142R <sup>a</sup> (5), S144N <sup>a</sup> (3), <b>S146G<sup>a</sup> (1)</b> , T128A <sup>b</sup> (3), <b>T135K<sup>b</sup> (2)</b> , Y159S <sup>b</sup> (3), K160T <sup>b</sup> (5), I186G <sup>b</sup> (8), S198P <sup>b</sup> (3), <b>D53E<sup>c</sup> (1)</b> , D53N <sup>c</sup> (1), Q311H <sup>c</sup> (2), S312N <sup>c</sup> (3), K121N <sup>d</sup> (3), K171N <sup>d</sup> (3), <b>I214T<sup>d</sup> (2)</b> , F219S <sup>d</sup> (8), G62E <sup>e</sup> (8), <b>Q75H<sup>e</sup> (1)</b> , <b>G78D<sup>e</sup> (2)</b> , R92K <sup>e</sup> (5), <b>Y94H<sup>e</sup> (2)</b>                             | <b>N122D<sup>a</sup> (2)</b> , F137S <sup>a</sup> (8), S138A <sup>a</sup> (5), I140K <sup>a</sup> (3), <b>G142R<sup>a</sup> (5)</b> , S144N <sup>a</sup> (3), <b>S146G<sup>a</sup> (1)</b> , A128T <sup>b</sup> (5), K135T <sup>b</sup> (6), Y159S <sup>b</sup> (3), I160T <sup>b</sup> (5), I160K <sup>b</sup> (3), V186G <sup>b</sup> (8), S193F <sup>b</sup> (8), S198P <sup>b</sup> (3), D53E <sup>c</sup> (1), D53N <sup>c</sup> (1), Q311H <sup>c</sup> (2), S312N <sup>c</sup> (3), K121N <sup>d</sup> (3), K171N <sup>d</sup> (3), <b>I214T<sup>d</sup> (2)</b> , N225D <sup>d</sup> (8), G62E <sup>e</sup> (8), <b>Q75H<sup>e</sup> (1)</b> , <b>G78D<sup>e</sup> (2)</b> , R92K <sup>e</sup> (5), <b>Y94H<sup>e</sup> (2)</b>                                                            |
|                                  | Female (N=41)            | N122D <sup>a</sup> (1), A138S <sup>a</sup> (3), I140K <sup>a</sup> (5), R142G <sup>a</sup> (7), R142K <sup>a</sup> (2), S144N <sup>a</sup> (8), S144K <sup>a</sup> (1), S145N <sup>a</sup> (2), T128A <sup>b</sup> (6), <b>H156Q<sup>b</sup> (1)</b> , <b>Y159F<sup>b</sup> (5)</b> , Y159S <sup>b</sup> (3), K160T <sup>b</sup> (4), P194L <sup>b</sup> (12), <b>A196T<sup>b</sup> (2)</b> , Q197R <sup>b</sup> (2), <b>S198A<sup>b</sup> (2)</b> , S198P <sup>b</sup> (3), <b>I48T<sup>c</sup> (2)</b> , D53N <sup>c</sup> (2), <b>G275S<sup>c</sup> (1)</b> , <b>K276R<sup>c</sup> (1)</b> , <b>K278N<sup>c</sup> (2)</b> , H311Q <sup>c</sup> (9), S312N <sup>c</sup> (5), S96N <sup>d</sup> (11), N121K <sup>d</sup> (2), N171K <sup>d</sup> (1), 203T <sup>d</sup>                                                                                 | A138S <sup>a</sup> (2), I140K <sup>a</sup> (2), G142R <sup>a</sup> (2), <b>G142K<sup>a</sup> (1)</b> , S144N <sup>a</sup> (4), <b>S145N<sup>a</sup> (2)</b> , T128A <sup>b</sup> (2), <b>H156Q<sup>b</sup> (1)</b> , <b>Y159F<sup>b</sup> (2)</b> , Y159S <sup>b</sup> (2), K160T <sup>b</sup> (1), P194L <sup>b</sup> (5), <b>A196T<sup>b</sup> (2)</b> , <b>Q197R<sup>b</sup> (1)</b> , <b>S198A<sup>b</sup> (2)</b> , S198P <sup>b</sup> (2), <b>I48T<sup>c</sup> (2)</b> , D53N <sup>c</sup> (1), <b>G275S<sup>c</sup> (1)</b> , <b>K276R<sup>c</sup> (1)</b> , <b>K278N<sup>c</sup> (2)</b> , H311Q <sup>c</sup> (4), S312N <sup>c</sup> (4), K121N <sup>d</sup> (5), | K131T <sup>a</sup> (5), A138S <sup>a</sup> (2), I140K <sup>a</sup> (2), K142R <sup>a</sup> (2), K142G <sup>a</sup> (2), S144N <sup>a</sup> (4), <b>S145N<sup>a</sup> (2)</b> , T128A <sup>b</sup> (2), <b>H156Q<sup>b</sup> (1)</b> , <b>Y159F<sup>b</sup> (2)</b> , Y159S <sup>b</sup> (2), K160T <sup>b</sup> (1), P194L <sup>b</sup> (5), <b>A196T<sup>b</sup> (2)</b> , <b>Q197R<sup>b</sup> (1)</b> , <b>S198A<sup>b</sup> (2)</b> , S198P <sup>b</sup> (2), <b>I48T<sup>c</sup> (2)</b> , D53N <sup>c</sup> (1), <b>G275S<sup>c</sup> (1)</b> , <b>K276R<sup>c</sup> (1)</b> , <b>K278N<sup>c</sup> (2)</b> , 300I <sup>c</sup> (5), H311Q <sup>c</sup> (4), S312N <sup>c</sup> (4), S96N <sup>d</sup> (5), <b>D225N<sup>d</sup> (2)</b> , <b>K83E<sup>e</sup> (1)</b> , Q261R <sup>e</sup> (5) | S138A <sup>a</sup> (3), I140K <sup>a</sup> (2), G142R <sup>a</sup> (2), <b>G142K<sup>a</sup> (1)</b> , K144S <sup>a</sup> (1), K144N <sup>a</sup> (4), S145N <sup>a</sup> (2), A128T <sup>b</sup> (3), <b>H156Q<sup>b</sup> (1)</b> , <b>S159F<sup>b</sup> (2)</b> , S159Y <sup>b</sup> (1), K160T <sup>b</sup> (1), N190D <sup>b</sup> (5), S193F <sup>b</sup> (5), <b>A196T<sup>b</sup> (2)</b> , <b>Q197R<sup>b</sup> (1)</b> , <b>S198A<sup>b</sup> (2)</b> , S198P <sup>b</sup> (2), <b>I48T<sup>c</sup> (2)</b> , D53N <sup>c</sup> (1), <b>G275S<sup>c</sup> (1)</b> , <b>K276R<sup>c</sup> (1)</b> , <b>K278N<sup>c</sup> (2)</b> , Q311H <sup>c</sup> (1), S312N <sup>c</sup> (4),                                                | K131T <sup>a</sup> (5), A138S <sup>a</sup> (2), I140K <sup>a</sup> (2), G142R <sup>a</sup> (2), <b>G142K<sup>a</sup> (1)</b> , S144N <sup>a</sup> (4), <b>S145N<sup>a</sup> (2)</b> , T128A <sup>b</sup> (2), <b>H156Q<sup>b</sup> (1)</b> , <b>Y159F<sup>b</sup> (2)</b> , Y159S <sup>b</sup> (2), K160T <sup>b</sup> (1), I186G <sup>b</sup> (5), <b>A196T<sup>b</sup> (2)</b> , <b>Q197R<sup>b</sup> (1)</b> , <b>S198A<sup>b</sup> (2)</b> , S198P <sup>b</sup> (2), <b>I48T<sup>c</sup> (2)</b> , D53N <sup>c</sup> (1), <b>G275S<sup>c</sup> (1)</b> , <b>K276R<sup>c</sup> (1)</b> , <b>K278N<sup>c</sup> (2)</b> , Q311H <sup>c</sup> (1), S312N <sup>c</sup> (4), K121N <sup>d</sup> (5), K171N <sup>d</sup> (5), | F137S <sup>a</sup> (5), S138A <sup>a</sup> (3), I140K <sup>a</sup> (2), G142R <sup>a</sup> (2), <b>G142K<sup>a</sup> (1)</b> , S144N <sup>a</sup> (4), <b>S145N<sup>a</sup> (2)</b> , A128T <sup>b</sup> (3), <b>S145N<sup>a</sup> (2)</b> , A128T <sup>b</sup> (3), <b>S145N<sup>a</sup> (2)</b> , K135T <sup>b</sup> (5), <b>H156Q<sup>b</sup> (1)</b> , <b>Y159F<sup>b</sup> (2)</b> , Y159S <sup>b</sup> (2), I160T <sup>b</sup> (1), I160K <sup>b</sup> (4), V186G <sup>b</sup> (5), S193F <sup>b</sup> (5), A196T <sup>b</sup> (2), Q197R <sup>b</sup> (1), <b>S198A<sup>b</sup> (2)</b> , S198P <sup>b</sup> (2), <b>I48T<sup>c</sup> (2)</b> , D53N <sup>c</sup> (1), <b>G275S<sup>c</sup> (1)</b> , <b>K276R<sup>c</sup> (1)</b> , <b>K278N<sup>c</sup> (2)</b> , Q311H <sup>c</sup> (1), |

|                                     |                            |                                                                                                                                                                                                                                                                                                                                                                                                                                                                                                                                                                                                                                                                                                                                 |                                                                                                                                                                                                                                                                                                                                                                                                                                                                                                                                                                                                                                        |                                                                                                                                                                                                                                                                                                                                                                                                                                                                                                                                                                                                                                                                                                        |                                                                                                                                                                                                                                                                                                                                                                                                                                                                                                                                                                                                                                                                                        |                                                                                                                                                                                                                                                                                                                                                                                                                                                                                                                                                                                                                                                                                        |                                                                                                                                                                                                                                                                                                                                                                                                                                                                                                                                                                                                                                                                                                                                        |
|-------------------------------------|----------------------------|---------------------------------------------------------------------------------------------------------------------------------------------------------------------------------------------------------------------------------------------------------------------------------------------------------------------------------------------------------------------------------------------------------------------------------------------------------------------------------------------------------------------------------------------------------------------------------------------------------------------------------------------------------------------------------------------------------------------------------|----------------------------------------------------------------------------------------------------------------------------------------------------------------------------------------------------------------------------------------------------------------------------------------------------------------------------------------------------------------------------------------------------------------------------------------------------------------------------------------------------------------------------------------------------------------------------------------------------------------------------------------|--------------------------------------------------------------------------------------------------------------------------------------------------------------------------------------------------------------------------------------------------------------------------------------------------------------------------------------------------------------------------------------------------------------------------------------------------------------------------------------------------------------------------------------------------------------------------------------------------------------------------------------------------------------------------------------------------------|----------------------------------------------------------------------------------------------------------------------------------------------------------------------------------------------------------------------------------------------------------------------------------------------------------------------------------------------------------------------------------------------------------------------------------------------------------------------------------------------------------------------------------------------------------------------------------------------------------------------------------------------------------------------------------------|----------------------------------------------------------------------------------------------------------------------------------------------------------------------------------------------------------------------------------------------------------------------------------------------------------------------------------------------------------------------------------------------------------------------------------------------------------------------------------------------------------------------------------------------------------------------------------------------------------------------------------------------------------------------------------------|----------------------------------------------------------------------------------------------------------------------------------------------------------------------------------------------------------------------------------------------------------------------------------------------------------------------------------------------------------------------------------------------------------------------------------------------------------------------------------------------------------------------------------------------------------------------------------------------------------------------------------------------------------------------------------------------------------------------------------------|
|                                     |                            | (12), <b>K207Q<sup>d</sup> (1)</b> , D225N <sup>d</sup> (5), <b>E62G<sup>e</sup> (1)</b> , <b>E62K<sup>e</sup> (1)</b> , <b>K83E<sup>e</sup> (1)</b> , <b>S91N<sup>e</sup> (1)</b> , K92R <sup>e</sup> (1), <b>S262N<sup>e</sup> (1)</b>                                                                                                                                                                                                                                                                                                                                                                                                                                                                                        | K171N <sup>d</sup> (5), <b>225N<sup>d</sup> (2)</b> , 225D <sup>d</sup> (3), <b>K83E<sup>e</sup> (1)</b>                                                                                                                                                                                                                                                                                                                                                                                                                                                                                                                               |                                                                                                                                                                                                                                                                                                                                                                                                                                                                                                                                                                                                                                                                                                        | <b>D225N<sup>d</sup> (2)</b> , 246N <sup>d</sup> (5), <b>K83E<sup>e</sup> (1)</b> , N91S <sup>e</sup> (5)                                                                                                                                                                                                                                                                                                                                                                                                                                                                                                                                                                              | F219S <sup>d</sup> (5), <b>D225N<sup>d</sup> (2)</b> , G62E <sup>e</sup> (5), <b>K83E<sup>e</sup> (1)</b> , R92K <sup>e</sup> (5)                                                                                                                                                                                                                                                                                                                                                                                                                                                                                                                                                      | S312N <sup>e</sup> (4), K121N <sup>d</sup> (5), K171N <sup>d</sup> (5), N225D <sup>d</sup> (3), G62E <sup>e</sup> (5), <b>K83E<sup>e</sup> (1)</b> , R92K <sup>e</sup> (5)                                                                                                                                                                                                                                                                                                                                                                                                                                                                                                                                                             |
|                                     | No gender data (N=1)       | Same as above                                                                                                                                                                                                                                                                                                                                                                                                                                                                                                                                                                                                                                                                                                                   | -                                                                                                                                                                                                                                                                                                                                                                                                                                                                                                                                                                                                                                      | -                                                                                                                                                                                                                                                                                                                                                                                                                                                                                                                                                                                                                                                                                                      | -                                                                                                                                                                                                                                                                                                                                                                                                                                                                                                                                                                                                                                                                                      | -                                                                                                                                                                                                                                                                                                                                                                                                                                                                                                                                                                                                                                                                                      | -                                                                                                                                                                                                                                                                                                                                                                                                                                                                                                                                                                                                                                                                                                                                      |
|                                     | HA not recovered (N= 11+8) | -                                                                                                                                                                                                                                                                                                                                                                                                                                                                                                                                                                                                                                                                                                                               | -                                                                                                                                                                                                                                                                                                                                                                                                                                                                                                                                                                                                                                      | -                                                                                                                                                                                                                                                                                                                                                                                                                                                                                                                                                                                                                                                                                                      | -                                                                                                                                                                                                                                                                                                                                                                                                                                                                                                                                                                                                                                                                                      | -                                                                                                                                                                                                                                                                                                                                                                                                                                                                                                                                                                                                                                                                                      | -                                                                                                                                                                                                                                                                                                                                                                                                                                                                                                                                                                                                                                                                                                                                      |
| <b>Antigenic drift by age group</b> |                            |                                                                                                                                                                                                                                                                                                                                                                                                                                                                                                                                                                                                                                                                                                                                 |                                                                                                                                                                                                                                                                                                                                                                                                                                                                                                                                                                                                                                        |                                                                                                                                                                                                                                                                                                                                                                                                                                                                                                                                                                                                                                                                                                        |                                                                                                                                                                                                                                                                                                                                                                                                                                                                                                                                                                                                                                                                                        |                                                                                                                                                                                                                                                                                                                                                                                                                                                                                                                                                                                                                                                                                        |                                                                                                                                                                                                                                                                                                                                                                                                                                                                                                                                                                                                                                                                                                                                        |
| Age [years]                         | 1 month-<2 (N=29)          | N122D <sup>a</sup> (1), <b>S124N<sup>a</sup> (1)</b> , T128A <sup>b</sup> (3), I140K <sup>a</sup> (2), R142G <sup>a</sup> (3), S144N <sup>a</sup> (3), <b>S144K<sup>a</sup> (2)</b> , <b>S146G<sup>a</sup> (1)</b> , <b>L157S<sup>b</sup> (1)</b> , Y159F <sup>b</sup> (3), K160T <sup>b</sup> (4), P194L <sup>b</sup> (7), S198P <sup>b</sup> (1), D53E <sup>c</sup> (1), D53N <sup>c</sup> (1), H311Q <sup>c</sup> (5), S96N <sup>d</sup> (7), N121K <sup>d</sup> (4), N171K <sup>d</sup> (2), 203T <sup>d</sup> (7), <b>K207Q<sup>d</sup> (1)</b> , I214T <sup>d</sup> (2), D225N <sup>d</sup> (3), Q75H <sup>e</sup> (1), K92R <sup>e</sup> (2), <b>S262N<sup>e</sup> (1)</b>                                               | G142R <sup>a</sup> (2), S146G <sup>a</sup> (1), K160T <sup>b</sup> (2), P194L <sup>b</sup> (2), <b>D53E<sup>c</sup> (1)</b> , H311Q <sup>c</sup> (2), I214T <sup>d</sup> (1), 225D <sup>d</sup> (2), <b>Q75H<sup>e</sup> (1)</b> , K92R <sup>e</sup> (2)                                                                                                                                                                                                                                                                                                                                                                               | K131T <sup>a</sup> (2), K142R <sup>a</sup> (2), S146G <sup>a</sup> (1), K160T <sup>b</sup> (2), P194L <sup>b</sup> (2), <b>D53E<sup>c</sup> (1)</b> , 300I <sup>c</sup> (2), H311Q <sup>c</sup> (2), S96N <sup>d</sup> (2), N121K <sup>d</sup> (2), N171K <sup>d</sup> (2), I214T <sup>d</sup> (1), <b>Q75H<sup>e</sup> (1)</b> , K92R <sup>e</sup> (2), Q261R <sup>e</sup> (2)                                                                                                                                                                                                                                                                                                                        | S138A <sup>a</sup> (2), G142R <sup>a</sup> (2), K144S <sup>a</sup> (2), S146G <sup>a</sup> (1), A128T <sup>b</sup> (2), S159Y <sup>b</sup> (2), K160T <sup>b</sup> (2), N190D <sup>b</sup> (2), S193F <sup>b</sup> (2), <b>D53E<sup>c</sup> (1)</b> , N121K <sup>d</sup> (2), N171K <sup>d</sup> (2), I214T <sup>d</sup> (1), 246N <sup>d</sup> (2), <b>Q75H<sup>e</sup> (1)</b> , N91S <sup>e</sup> (2), K92R <sup>e</sup> (2)                                                                                                                                                                                                                                                        | K131T <sup>a</sup> (2), G142R <sup>a</sup> (2), S146G <sup>a</sup> (1), K160T <sup>b</sup> (2), I186G <sup>b</sup> (2), <b>D53E<sup>c</sup> (1)</b> , I214T <sup>d</sup> (1), F219S <sup>d</sup> (2), G62E <sup>e</sup> (2), <b>Q75H<sup>e</sup> (1)</b>                                                                                                                                                                                                                                                                                                                                                                                                                               | F137S <sup>a</sup> (2), S138A <sup>a</sup> (2), G142R <sup>a</sup> (2), S146G <sup>a</sup> (1), A128T <sup>b</sup> (2), K135T <sup>b</sup> (2), I160T <sup>b</sup> (2), V186G <sup>b</sup> (2), S193F <sup>b</sup> (2), <b>D53E<sup>c</sup> (1)</b> , I214T <sup>d</sup> (1), N225D <sup>d</sup> (2), G62E <sup>e</sup> (2), <b>Q75H<sup>e</sup> (1)</b>                                                                                                                                                                                                                                                                                                                                                                               |
|                                     | 2-<5 (N=41)                | N122D <sup>a</sup> (1), T128A <sup>b</sup> (5), T135K <sup>b</sup> (1), A138S <sup>a</sup> (3), I140K <sup>a</sup> (4), R142G <sup>a</sup> (5), R142K <sup>a</sup> (3), S144N <sup>a</sup> (5), <b>H156Q<sup>b</sup> (1)</b> , Y159F <sup>b</sup> (2), Y159S <sup>b</sup> (3), K160T <sup>b</sup> (5), P194L <sup>b</sup> (10), A196T <sup>b</sup> (1), Q197R <sup>b</sup> (3), S198P <sup>b</sup> (3), D53N <sup>c</sup> (4), H311Q <sup>c</sup> (6), S312N <sup>c</sup> (3), S96N <sup>d</sup> (9), N121K <sup>d</sup> (2), N171K <sup>d</sup> (2), 203T <sup>d</sup> (10), I214T <sup>d</sup> (1), D225N <sup>d</sup> (2), <b>E62K<sup>e</sup> (1)</b> , G78D <sup>e</sup> (1), K92R <sup>e</sup> (1), Y94H <sup>e</sup> (1) | N122D <sup>a</sup> (1), A138S <sup>a</sup> (2), I140K <sup>a</sup> (2), G142R <sup>a</sup> (2), <b>G142K<sup>a</sup> (1)</b> , S144N <sup>a</sup> (2), T128A <sup>b</sup> (2), T135K <sup>b</sup> (1), <b>H156Q<sup>b</sup> (1)</b> , Y159S <sup>b</sup> (2), K160T <sup>b</sup> (3), P194L <sup>b</sup> (5), A196T <sup>b</sup> (1), Q197R <sup>b</sup> (1), S198P <sup>b</sup> (2), <b>D53N<sup>c</sup> (2)</b> , H311Q <sup>c</sup> (3), S312N <sup>c</sup> (2), K121N <sup>d</sup> (3), K171N <sup>d</sup> (3), I214T <sup>d</sup> (1), 225D <sup>d</sup> (5), G78D <sup>e</sup> (1), K92R <sup>e</sup> (1), Y94H <sup>e</sup> (1) | N122D <sup>a</sup> (1), K131T <sup>a</sup> (5), A138S <sup>a</sup> (2), I140K <sup>a</sup> (2), K142R <sup>a</sup> (2), K142G <sup>a</sup> (2), S144N <sup>a</sup> (2), T128A <sup>b</sup> (2), T135K <sup>b</sup> (1), <b>H156Q<sup>b</sup> (1)</b> , Y159S <sup>b</sup> (2), K160T <sup>b</sup> (3), P194L <sup>b</sup> (5), A196T <sup>b</sup> (1), Q197R <sup>b</sup> (1), S198P <sup>b</sup> (2), <b>D53N<sup>c</sup> (2)</b> , 300I <sup>c</sup> (5), H311Q <sup>c</sup> (3), S312N <sup>c</sup> (2), S96N <sup>d</sup> (5), N121K <sup>d</sup> (2), N171K <sup>d</sup> (2), I214T <sup>d</sup> (1), G78D <sup>e</sup> (1), K92R <sup>e</sup> (1), Y94H <sup>e</sup> (1), Q261R <sup>e</sup> (5) | N122D <sup>a</sup> (1), S138A <sup>a</sup> (3), I140K <sup>a</sup> (2), G142R <sup>a</sup> (2), <b>G142K<sup>a</sup> (1)</b> , K144S <sup>a</sup> (3), K144N <sup>a</sup> (2), A128T <sup>b</sup> (3), T135K <sup>b</sup> (1), <b>H156Q<sup>b</sup> (1)</b> , S159Y <sup>b</sup> (3), K160T <sup>b</sup> (3), N190D <sup>b</sup> (5), S193F <sup>b</sup> (5), A196T <sup>b</sup> (1), Q197R <sup>b</sup> (1), S198P <sup>b</sup> (2), <b>D53N<sup>c</sup> (2)</b> , Q311H <sup>c</sup> (2), S312N <sup>c</sup> (2), N121K <sup>d</sup> (2), N171K <sup>d</sup> (2), I214T <sup>d</sup> (1), G78D <sup>e</sup> (1), N91S <sup>e</sup> (5), K92R <sup>e</sup> (1), Y94H <sup>e</sup> (1) | N122D <sup>a</sup> (1), K131T <sup>a</sup> (5), A138S <sup>a</sup> (2), I140K <sup>a</sup> (2), G142R <sup>a</sup> (2), <b>G142K<sup>a</sup> (1)</b> , S144N <sup>a</sup> (2), T128A <sup>b</sup> (2), T135K <sup>b</sup> (1), <b>H156Q<sup>b</sup> (1)</b> , Y159S <sup>b</sup> (2), K160T <sup>b</sup> (3), I186G <sup>b</sup> (5), A196T <sup>b</sup> (1), Q197R <sup>b</sup> (1), S198P <sup>b</sup> (2), <b>D53N<sup>c</sup> (2)</b> , Q311H <sup>c</sup> (2), S312N <sup>c</sup> (2), K121N <sup>d</sup> (3), K171N <sup>d</sup> (3), I214T <sup>d</sup> (1), F219S <sup>d</sup> (5), G62E <sup>e</sup> (5), G78D <sup>e</sup> (1), R92K <sup>e</sup> (4), Y94H <sup>e</sup> (1) | N122D <sup>a</sup> (1), F137S <sup>a</sup> (5), S138A <sup>a</sup> (3), I140K <sup>a</sup> (2), G142R <sup>a</sup> (2), <b>G142K<sup>a</sup> (1)</b> , S144N <sup>a</sup> (2), A128T <sup>b</sup> (3), K135T <sup>b</sup> (4), <b>H156Q<sup>b</sup> (1)</b> , Y159S <sup>b</sup> (2), I160T <sup>b</sup> (3), I160K <sup>b</sup> (2), V186G <sup>b</sup> (5), S193F <sup>b</sup> (5), A196T <sup>b</sup> (1), Q197R <sup>b</sup> (1), S198P <sup>b</sup> (2), <b>D53N<sup>c</sup> (2)</b> , Q311H <sup>c</sup> (2), S312N <sup>c</sup> (2), K121N <sup>d</sup> (3), K171N <sup>d</sup> (3), I214T <sup>d</sup> (1), N225D <sup>d</sup> (5), G62E <sup>e</sup> (5), G78D <sup>e</sup> (1), R92K <sup>e</sup> (5), Y94H <sup>e</sup> (1) |

|                                               |                          |                                                                                                                                                                                                                                                                                                                                                                                                                                                                                                                                                                                                                                                                                                                                                                                                                                                                                           |                                                                                                                                                                                                                                                                                                                                                                                                                                                                                                                                                                                                                                                                                                                                               |                                                                                                                                                                                                                                                                                                                                                                                                                                                                                                                                                                                                                                                                                                                                                                                                                                                 |                                                                                                                                                                                                                                                                                                                                                                                                                                                                                                                                                                                                                                                                                                                                                                                          |                                                                                                                                                                                                                                                                                                                                                                                                                                                                                                                                                                                                                                                                                                                                                 |                                                                                                                                                                                                                                                                                                                                                                                                                                                                                                                                                                                                                                                                                                                                                        |
|-----------------------------------------------|--------------------------|-------------------------------------------------------------------------------------------------------------------------------------------------------------------------------------------------------------------------------------------------------------------------------------------------------------------------------------------------------------------------------------------------------------------------------------------------------------------------------------------------------------------------------------------------------------------------------------------------------------------------------------------------------------------------------------------------------------------------------------------------------------------------------------------------------------------------------------------------------------------------------------------|-----------------------------------------------------------------------------------------------------------------------------------------------------------------------------------------------------------------------------------------------------------------------------------------------------------------------------------------------------------------------------------------------------------------------------------------------------------------------------------------------------------------------------------------------------------------------------------------------------------------------------------------------------------------------------------------------------------------------------------------------|-------------------------------------------------------------------------------------------------------------------------------------------------------------------------------------------------------------------------------------------------------------------------------------------------------------------------------------------------------------------------------------------------------------------------------------------------------------------------------------------------------------------------------------------------------------------------------------------------------------------------------------------------------------------------------------------------------------------------------------------------------------------------------------------------------------------------------------------------|------------------------------------------------------------------------------------------------------------------------------------------------------------------------------------------------------------------------------------------------------------------------------------------------------------------------------------------------------------------------------------------------------------------------------------------------------------------------------------------------------------------------------------------------------------------------------------------------------------------------------------------------------------------------------------------------------------------------------------------------------------------------------------------|-------------------------------------------------------------------------------------------------------------------------------------------------------------------------------------------------------------------------------------------------------------------------------------------------------------------------------------------------------------------------------------------------------------------------------------------------------------------------------------------------------------------------------------------------------------------------------------------------------------------------------------------------------------------------------------------------------------------------------------------------|--------------------------------------------------------------------------------------------------------------------------------------------------------------------------------------------------------------------------------------------------------------------------------------------------------------------------------------------------------------------------------------------------------------------------------------------------------------------------------------------------------------------------------------------------------------------------------------------------------------------------------------------------------------------------------------------------------------------------------------------------------|
|                                               | 5-<15 (N=18)             | N122D <sup>a</sup> (1), T128A <sup>b</sup> (3), T135K <sup>b</sup> (1), A138S <sup>a</sup> (3), I140K <sup>a</sup> (3), R142G <sup>a</sup> (4), R142K <sup>a</sup> (1), S144N <sup>a</sup> (4), S145N <sup>a</sup> (1), S145N <sup>a</sup> (1), Y159F <sup>b</sup> (1), Y159S <sup>b</sup> (3), K160T <sup>b</sup> (4), P194L <sup>b</sup> (8), A196T <sup>b</sup> (1), Q197R <sup>b</sup> (1), S198A <sup>b</sup> (3), S198P <sup>b</sup> (1), I48T <sup>c</sup> (1), D53E <sup>c</sup> (1), D53N <sup>c</sup> (1), K278N <sup>c</sup> (1), H311Q <sup>c</sup> (6), S312N <sup>c</sup> (4), S96N <sup>d</sup> (8), N121K <sup>d</sup> (3), N171K <sup>d</sup> (3), 203T <sup>d</sup> (8), D225N <sup>d</sup> (1), <b>E62G<sup>e</sup> (1)</b> , Q75H <sup>e</sup> (1), G78D <sup>e</sup> (1), K83E <sup>e</sup> (1), S91N <sup>e</sup> (1), K92R <sup>e</sup> (2), Y94H <sup>e</sup> (1) | N122D <sup>a</sup> (1), A138S <sup>a</sup> (3), I140K <sup>a</sup> (3), G142R <sup>a</sup> (2), S144N <sup>a</sup> (4), S145N <sup>a</sup> (1), T128A <sup>b</sup> (3), T135K <sup>b</sup> (1), <b>Y159F<sup>b</sup> (1)</b> , Y159S <sup>b</sup> (3), K160T <sup>b</sup> (1), P194L <sup>b</sup> (5), A196T <sup>b</sup> (1), S198A <sup>b</sup> (1), S198P <sup>b</sup> (3), I48T <sup>c</sup> (1), K278N <sup>c</sup> (1), H311Q <sup>c</sup> (4), S312N <sup>c</sup> (4), K121N <sup>d</sup> (4), K171N <sup>d</sup> (4), 225N <sup>d</sup> (1), 225D <sup>d</sup> (4), G78D <sup>e</sup> (1), <b>K83E<sup>e</sup> (1)</b> , Y94H <sup>e</sup> (1)                                                                                        | N122D <sup>a</sup> (1), K131T <sup>a</sup> (5), A138S <sup>a</sup> (3), I140K <sup>a</sup> (3), K142R <sup>a</sup> (2), K142G <sup>a</sup> (3), S144N <sup>a</sup> (4), S145N <sup>a</sup> (1), T128A <sup>b</sup> (3), T135K <sup>b</sup> (1), <b>Y159F<sup>b</sup> (1)</b> , Y159S <sup>b</sup> (3), K160T <sup>b</sup> (1), P194L <sup>b</sup> (5), A196T <sup>b</sup> (1), S198A <sup>b</sup> (1), S198P <sup>b</sup> (3), I48T <sup>c</sup> (1), K278N <sup>c</sup> (1), 300I <sup>c</sup> (5), H311Q <sup>c</sup> (4), S312N <sup>c</sup> (4), S96N <sup>d</sup> (5), N121K <sup>d</sup> (1), N171K <sup>d</sup> (1), D225N <sup>d</sup> (1), G78D <sup>e</sup> (1), <b>K83E<sup>e</sup> (1)</b> , Y94H <sup>e</sup> (1), Q261R <sup>e</sup> (5)                                                                                          | N122D <sup>a</sup> (1), S138A <sup>a</sup> (2), I140K <sup>a</sup> (3), G142R <sup>a</sup> (2), K144S <sup>a</sup> (1), K144N <sup>a</sup> (4), S145N <sup>a</sup> (1), A128T <sup>b</sup> (1), T135K <sup>b</sup> (1), <b>S159F<sup>b</sup> (1)</b> , S159Y <sup>b</sup> (1), K160T <sup>b</sup> (1), N190D <sup>b</sup> (5), S193F <sup>b</sup> (5), A196T <sup>b</sup> (1), S198A <sup>b</sup> (1), S198P <sup>b</sup> (3), I48T <sup>c</sup> (1), K278N <sup>c</sup> (1), Q311H <sup>c</sup> (1), S312N <sup>c</sup> (4), N121K <sup>d</sup> (1), N171K <sup>d</sup> (1), D225N <sup>d</sup> (1), 246N <sup>d</sup> (5), G78D <sup>e</sup> (1), <b>K83E<sup>e</sup> (1)</b> , N91S <sup>e</sup> (5), Y94H <sup>e</sup> (1)                                                           | N122D <sup>a</sup> (1), K131T <sup>a</sup> (5), A138S <sup>a</sup> (3), I140K <sup>a</sup> (3), G142R <sup>a</sup> (2), S144N <sup>a</sup> (4), S145N <sup>a</sup> (1), T128A <sup>b</sup> (3), T135K <sup>b</sup> (1), <b>Y159F<sup>b</sup> (1)</b> , Y159S <sup>b</sup> (3), K160T <sup>b</sup> (1), I186G <sup>b</sup> (5), A196T <sup>b</sup> (1), S198A <sup>b</sup> (1), S198P <sup>b</sup> (3), I48T <sup>c</sup> (1), K278N <sup>c</sup> (1), Q311H <sup>c</sup> (1), S312N <sup>c</sup> (4), K121N <sup>d</sup> (4), K171N <sup>d</sup> (4), F219S <sup>d</sup> (5), D225N <sup>d</sup> (1), G62E <sup>e</sup> (5), G78D <sup>e</sup> (1), <b>K83E<sup>e</sup> (1)</b> , R92K <sup>e</sup> (5), Y94H <sup>e</sup> (1)                  | N122D <sup>a</sup> (1), F137S <sup>a</sup> (5), S138A <sup>a</sup> (2), I140K <sup>a</sup> (3), G142R <sup>a</sup> (2), S144N <sup>a</sup> (4), S145N <sup>a</sup> (1), A128T <sup>b</sup> (1), T135K <sup>b</sup> (1), <b>Y159F<sup>b</sup> (1)</b> , Y159S <sup>b</sup> (3), I160T <sup>b</sup> (1), I160K <sup>b</sup> (4), V186G <sup>b</sup> (5), S193F <sup>b</sup> (5), A196T <sup>b</sup> (1), S198A <sup>b</sup> (1), S198P <sup>b</sup> (3), I48T <sup>c</sup> (1), K278N <sup>c</sup> (1), Q311H <sup>c</sup> (1), S312N <sup>c</sup> (4), K121N <sup>d</sup> (4), K171N <sup>d</sup> (4), N225D <sup>d</sup> (4), G62E <sup>e</sup> (5), G78D <sup>e</sup> (1), <b>K83E<sup>e</sup> (1)</b> , R92K <sup>e</sup> (5), Y94H <sup>e</sup> (1) |
|                                               | 15-<50 (N=9)             | R142K <sup>a</sup> (1), S144N <sup>a</sup> (1), S145N <sup>a</sup> (1), Y159F <sup>b</sup> (1), K160T <sup>b</sup> (1), P194L <sup>b</sup> (2), Q197R <sup>b</sup> (1), S198A <sup>b</sup> (1), I48T <sup>c</sup> (1), D53N <sup>c</sup> (1), <b>G275S<sup>c</sup> (1)</b> , <b>K276R<sup>c</sup> (1)</b> , K278N <sup>c</sup> (1), H311Q <sup>c</sup> (1), S312N <sup>c</sup> (1), S96N <sup>d</sup> (2), 203T <sup>d</sup> (2), D225N <sup>d</sup> (1)                                                                                                                                                                                                                                                                                                                                                                                                                                  | G142R <sup>a</sup> (1), S144N <sup>a</sup> (1), S145N <sup>a</sup> (1), Y159F <sup>b</sup> (1), P194L <sup>b</sup> (1), S198A <sup>b</sup> (1), I48T <sup>c</sup> (1), <b>G275S<sup>c</sup> (1)</b> , <b>K276R<sup>c</sup> (1)</b> , K278N <sup>c</sup> (1), H311Q <sup>c</sup> (1), S312N <sup>c</sup> (1), K121N <sup>d</sup> (1), K171N <sup>d</sup> (1), 225N <sup>d</sup> (1)                                                                                                                                                                                                                                                                                                                                                            | K131T <sup>a</sup> (1), K142R <sup>a</sup> (1), S144N <sup>a</sup> (1), S145N <sup>a</sup> (1), Y159F <sup>b</sup> (1), P194L <sup>b</sup> (1), S198A <sup>b</sup> (1), I48T <sup>c</sup> (1), <b>G275S<sup>c</sup> (1)</b> , <b>K276R<sup>c</sup> (1)</b> , K278N <sup>c</sup> (1), 300I <sup>c</sup> (1), H311Q <sup>c</sup> (1), S312N <sup>c</sup> (1), S96N <sup>d</sup> (1), D225N <sup>d</sup> (1), Q261R <sup>e</sup> (1)                                                                                                                                                                                                                                                                                                                                                                                                               | S138A <sup>a</sup> (1), G142R <sup>a</sup> (1), K144S <sup>a</sup> (1), S145N <sup>a</sup> (1), A128T <sup>b</sup> (1), S159F <sup>b</sup> (1), N190D <sup>b</sup> (1), S193F <sup>b</sup> (1), S198A <sup>b</sup> (1), I48T <sup>c</sup> (1), <b>G275S<sup>c</sup> (1)</b> , <b>K276R<sup>c</sup> (1)</b> , K278N <sup>c</sup> (1), S312N <sup>c</sup> (1), D225N <sup>d</sup> (1), 246N <sup>d</sup> (1), N91S <sup>e</sup> (1)                                                                                                                                                                                                                                                                                                                                                        | K131T <sup>a</sup> (1), G142R <sup>a</sup> (1), S144N <sup>a</sup> (1), S145N <sup>a</sup> (1), Y159F <sup>b</sup> (1), I186G <sup>b</sup> (1), S198A <sup>b</sup> (1), I48T <sup>c</sup> (1), <b>G275S<sup>c</sup> (1)</b> , <b>K276R<sup>c</sup> (1)</b> , K278N <sup>c</sup> (1), S312N <sup>c</sup> (1), K121N <sup>d</sup> (1), K171N <sup>d</sup> (1), F219S <sup>d</sup> (1), D225N <sup>d</sup> (1), G62E <sup>e</sup> (1), R92K <sup>e</sup> (1)                                                                                                                                                                                                                                                                                       | F137S <sup>a</sup> (1), S138A <sup>a</sup> (1), G142R <sup>a</sup> (1), S144N <sup>a</sup> (1), S145N <sup>a</sup> (1), A128T <sup>b</sup> (1), K135T <sup>b</sup> (1), Y159F <sup>b</sup> (1), I160K <sup>b</sup> (1), V186G <sup>b</sup> (1), S193F <sup>b</sup> (1), S198A <sup>b</sup> (1), I48T <sup>c</sup> (1), <b>G275S<sup>c</sup> (1)</b> , <b>K276R<sup>c</sup> (1)</b> , K278N <sup>c</sup> (1), S312N <sup>c</sup> (1), K121N <sup>d</sup> (1), K171N <sup>d</sup> (1), G62E <sup>e</sup> (1), R92K <sup>e</sup> (1)                                                                                                                                                                                                                      |
|                                               | 50-<65 (N=1)             | -                                                                                                                                                                                                                                                                                                                                                                                                                                                                                                                                                                                                                                                                                                                                                                                                                                                                                         | -                                                                                                                                                                                                                                                                                                                                                                                                                                                                                                                                                                                                                                                                                                                                             | -                                                                                                                                                                                                                                                                                                                                                                                                                                                                                                                                                                                                                                                                                                                                                                                                                                               | -                                                                                                                                                                                                                                                                                                                                                                                                                                                                                                                                                                                                                                                                                                                                                                                        | -                                                                                                                                                                                                                                                                                                                                                                                                                                                                                                                                                                                                                                                                                                                                               |                                                                                                                                                                                                                                                                                                                                                                                                                                                                                                                                                                                                                                                                                                                                                        |
|                                               | ≥ 65 (N=0)               | -                                                                                                                                                                                                                                                                                                                                                                                                                                                                                                                                                                                                                                                                                                                                                                                                                                                                                         | -                                                                                                                                                                                                                                                                                                                                                                                                                                                                                                                                                                                                                                                                                                                                             | -                                                                                                                                                                                                                                                                                                                                                                                                                                                                                                                                                                                                                                                                                                                                                                                                                                               | -                                                                                                                                                                                                                                                                                                                                                                                                                                                                                                                                                                                                                                                                                                                                                                                        | -                                                                                                                                                                                                                                                                                                                                                                                                                                                                                                                                                                                                                                                                                                                                               |                                                                                                                                                                                                                                                                                                                                                                                                                                                                                                                                                                                                                                                                                                                                                        |
|                                               | No data (N=1)            | Same as above                                                                                                                                                                                                                                                                                                                                                                                                                                                                                                                                                                                                                                                                                                                                                                                                                                                                             | -                                                                                                                                                                                                                                                                                                                                                                                                                                                                                                                                                                                                                                                                                                                                             | -                                                                                                                                                                                                                                                                                                                                                                                                                                                                                                                                                                                                                                                                                                                                                                                                                                               | -                                                                                                                                                                                                                                                                                                                                                                                                                                                                                                                                                                                                                                                                                                                                                                                        | -                                                                                                                                                                                                                                                                                                                                                                                                                                                                                                                                                                                                                                                                                                                                               |                                                                                                                                                                                                                                                                                                                                                                                                                                                                                                                                                                                                                                                                                                                                                        |
|                                               | HA not recovered (N= 19) | -                                                                                                                                                                                                                                                                                                                                                                                                                                                                                                                                                                                                                                                                                                                                                                                                                                                                                         | -                                                                                                                                                                                                                                                                                                                                                                                                                                                                                                                                                                                                                                                                                                                                             | -                                                                                                                                                                                                                                                                                                                                                                                                                                                                                                                                                                                                                                                                                                                                                                                                                                               | -                                                                                                                                                                                                                                                                                                                                                                                                                                                                                                                                                                                                                                                                                                                                                                                        | -                                                                                                                                                                                                                                                                                                                                                                                                                                                                                                                                                                                                                                                                                                                                               |                                                                                                                                                                                                                                                                                                                                                                                                                                                                                                                                                                                                                                                                                                                                                        |
| <b>Antigenic drift by geographical region</b> |                          |                                                                                                                                                                                                                                                                                                                                                                                                                                                                                                                                                                                                                                                                                                                                                                                                                                                                                           |                                                                                                                                                                                                                                                                                                                                                                                                                                                                                                                                                                                                                                                                                                                                               |                                                                                                                                                                                                                                                                                                                                                                                                                                                                                                                                                                                                                                                                                                                                                                                                                                                 |                                                                                                                                                                                                                                                                                                                                                                                                                                                                                                                                                                                                                                                                                                                                                                                          |                                                                                                                                                                                                                                                                                                                                                                                                                                                                                                                                                                                                                                                                                                                                                 |                                                                                                                                                                                                                                                                                                                                                                                                                                                                                                                                                                                                                                                                                                                                                        |
| Region                                        | Central (N=80)           | N122D <sup>a</sup> (3), S124N <sup>a</sup> (1), T128A <sup>b</sup> (11), T135K <sup>b</sup> (2), A138S <sup>a</sup> (6), I140K <sup>a</sup> (9), R142G <sup>a</sup> (11), R142K <sup>a</sup> (4), S144N <sup>a</sup> (13), S144K <sup>a</sup> (1), S145N <sup>a</sup> (2), S146G <sup>a</sup> (1), H156Q <sup>b</sup> (1), Y159F <sup>b</sup> (7), Y159S <sup>b</sup> (6), K160T <sup>b</sup> (11), P194L <sup>b</sup> (24), A196T <sup>b</sup> (2), Q197R <sup>b</sup> (4), S198A <sup>b</sup> (2), S198P <sup>b</sup> (6), I48T <sup>c</sup> (2), D53E <sup>c</sup> (2), D53N <sup>c</sup> (6), G275S <sup>c</sup> (1), K276R <sup>c</sup> (1), K278N <sup>c</sup> (2), H311Q <sup>c</sup> (17), S312N <sup>c</sup> (8), S96N <sup>d</sup> (23),                                                                                                                                        | N122D <sup>a</sup> (2), A138S <sup>a</sup> (5), I140K <sup>a</sup> (5), G142R <sup>a</sup> (7), S144N <sup>a</sup> (7), S145N <sup>a</sup> (2), S146G <sup>a</sup> (1), T128A <sup>b</sup> (5), T135K <sup>b</sup> (2), H156Q <sup>b</sup> (1), Y159F <sup>b</sup> (2), Y159S <sup>b</sup> (5), K160T <sup>b</sup> (5), P194L <sup>b</sup> (12), A196T <sup>b</sup> (2), S198A <sup>b</sup> (2), S198P <sup>b</sup> (5), I48T <sup>c</sup> (2), D53E <sup>c</sup> (1), D53N <sup>c</sup> (1), G275S <sup>c</sup> (1), K276R <sup>c</sup> (1), K278N <sup>c</sup> (2), H311Q <sup>c</sup> (10), S312N <sup>c</sup> (7), K121N <sup>d</sup> (7), K171N <sup>d</sup> (7), I214T <sup>d</sup> (2), 225N <sup>d</sup> (2), 225D <sup>d</sup> (10), | N122D <sup>a</sup> (2), K131T <sup>a</sup> (12), A138S <sup>a</sup> (5), I140K <sup>a</sup> (5), K142R <sup>a</sup> (7), K142G <sup>a</sup> (5), S144N <sup>a</sup> (7), S145N <sup>a</sup> (2), S146G <sup>a</sup> (1), T128A <sup>b</sup> (5), S146G <sup>a</sup> (1), T128A <sup>b</sup> (5), T135K <sup>b</sup> (2), H156Q <sup>b</sup> (1), Y159F <sup>b</sup> (2), Y159S <sup>b</sup> (5), K160T <sup>b</sup> (5), P194L <sup>b</sup> (12), A196T <sup>b</sup> (2), S198A <sup>b</sup> (2), S198P <sup>b</sup> (5), I48T <sup>c</sup> (2), D53E <sup>c</sup> (1), D53N <sup>c</sup> (1), G275S <sup>c</sup> (1), K276R <sup>c</sup> (1), K278N <sup>c</sup> (2), 300I <sup>c</sup> (12), H311Q <sup>c</sup> (10), S312N <sup>c</sup> (7), S96N <sup>d</sup> (12), N121K <sup>d</sup> (5), N171K <sup>d</sup> (5), I214T <sup>d</sup> (2), | N122D <sup>a</sup> (2), S138A <sup>a</sup> (7), I140K <sup>a</sup> (5), G142R <sup>a</sup> (7), K144S <sup>a</sup> (5), K144N <sup>a</sup> (7), S145N <sup>a</sup> (2), S146G <sup>a</sup> (1), A128T <sup>b</sup> (7), T135K <sup>b</sup> (2), H156Q <sup>b</sup> (1), S159F <sup>b</sup> (2), S159Y <sup>b</sup> (5), K160T <sup>b</sup> (5), N190D <sup>b</sup> (12), S193F <sup>b</sup> (12), A196T <sup>b</sup> (2), S198A <sup>b</sup> (2), S198P <sup>b</sup> (5), I48T <sup>c</sup> (2), D53E <sup>c</sup> (1), D53N <sup>c</sup> (1), G275S <sup>c</sup> (1), K276R <sup>c</sup> (1), K278N <sup>c</sup> (2), Q311H <sup>c</sup> (2), S312N <sup>c</sup> (7), N121K <sup>d</sup> (5), N171K <sup>d</sup> (5), I214T <sup>d</sup> (2), D225N <sup>d</sup> (2), 246N <sup>d</sup> | N122D <sup>a</sup> (2), K131T <sup>a</sup> (12), A138S <sup>a</sup> (5), I140K <sup>a</sup> (5), G142R <sup>a</sup> (7), S144N <sup>a</sup> (7), S145N <sup>a</sup> (2), S146G <sup>a</sup> (1), T128A <sup>b</sup> (5), T135K <sup>b</sup> (2), H156Q <sup>b</sup> (1), Y159F <sup>b</sup> (2), Y159S <sup>b</sup> (5), K160T <sup>b</sup> (5), I186G <sup>b</sup> (12), A196T <sup>b</sup> (2), S198A <sup>b</sup> (2), S198P <sup>b</sup> (5), I48T <sup>c</sup> (2), D53E <sup>c</sup> (1), D53N <sup>c</sup> (1), G275S <sup>c</sup> (1), K276R <sup>c</sup> (1), K278N <sup>c</sup> (2), Q311H <sup>c</sup> (2), S312N <sup>c</sup> (7), K121N <sup>d</sup> (7), K171N <sup>d</sup> (7), I214T <sup>d</sup> (2), F219S <sup>d</sup> (12), | N122D <sup>a</sup> (2), F137S <sup>a</sup> (12), S138A <sup>a</sup> (7), I140K <sup>a</sup> (5), G142R <sup>a</sup> (7), S144N <sup>a</sup> (7), S145N <sup>a</sup> (2), S146G <sup>a</sup> (1), A128T <sup>b</sup> (7), K135T <sup>b</sup> (10), H156Q <sup>b</sup> (1), Y159F <sup>b</sup> (2), Y159S <sup>b</sup> (5), I160T <sup>b</sup> (5), I160K <sup>b</sup> (7), V186G <sup>b</sup> (12), S193F <sup>b</sup> (12), A196T <sup>b</sup> (2), S198A <sup>b</sup> (2), S198P <sup>b</sup> (5), I48T <sup>c</sup> (2), D53E <sup>c</sup> (1), D53N <sup>c</sup> (1), G275S <sup>c</sup> (1), K276R <sup>c</sup> (1), K278N <sup>c</sup> (2), Q311H <sup>c</sup> (2), S312N <sup>c</sup> (7), K121N <sup>d</sup> (7), K171N <sup>d</sup> (7),       |



|                          |                                                                                                                                                                                                                                                                                                                                     |                                                                                                                                                                                                            |                                                                                                                                                                                                    |                                                                                                                                                                                                                                                                                         |                                                                                                                                                                                                                                                                                                           |                                                                                                                                                                                                                                                                                                                                                                                                    |
|--------------------------|-------------------------------------------------------------------------------------------------------------------------------------------------------------------------------------------------------------------------------------------------------------------------------------------------------------------------------------|------------------------------------------------------------------------------------------------------------------------------------------------------------------------------------------------------------|----------------------------------------------------------------------------------------------------------------------------------------------------------------------------------------------------|-----------------------------------------------------------------------------------------------------------------------------------------------------------------------------------------------------------------------------------------------------------------------------------------|-----------------------------------------------------------------------------------------------------------------------------------------------------------------------------------------------------------------------------------------------------------------------------------------------------------|----------------------------------------------------------------------------------------------------------------------------------------------------------------------------------------------------------------------------------------------------------------------------------------------------------------------------------------------------------------------------------------------------|
|                          | N121K <sup>d</sup> (7), N171K <sup>d</sup> (6), 203T <sup>d</sup> (24), <b>K207Q<sup>d</sup> (1), I214T<sup>d</sup> (3), D225N<sup>d</sup> (7), E62K<sup>e</sup> (1), Q75H<sup>e</sup> (2), G78D<sup>e</sup> (2), K83E<sup>e</sup> (1), S91N<sup>e</sup> (1), K92R<sup>e</sup> (4), Y94H<sup>e</sup> (2), S262N<sup>e</sup> (1)</b> | <b>Q75H<sup>e</sup> (1), G78D<sup>e</sup> (2), K83E<sup>e</sup> (1), K92R<sup>e</sup> (3), Y94H<sup>e</sup> (2)</b>                                                                                        | <b>D225N<sup>d</sup> (2), Q75H<sup>e</sup> (1), G78D<sup>e</sup> (2), K83E<sup>e</sup> (1), K92R<sup>e</sup> (3), Y94H<sup>e</sup> (2), Q261R<sup>e</sup> (12)</b>                                 | <b>(12), Q75H<sup>e</sup> (1), G78D<sup>e</sup> (2), K83E<sup>e</sup> (1), N91S<sup>e</sup> (12), K92R<sup>e</sup> (3), Y94H<sup>e</sup> (2)</b>                                                                                                                                        | <b>D225N<sup>d</sup> (2), G62E<sup>e</sup> (12), Q75H<sup>e</sup> (1), G78D<sup>e</sup> (2), K83E<sup>e</sup> (1), R92K<sup>e</sup> (9), Y94H<sup>e</sup> (2)</b>                                                                                                                                         | <b>I214T<sup>d</sup> (2), N225D<sup>d</sup> (10), G62E<sup>e</sup> (12), Q75H<sup>e</sup> (1), G78D<sup>e</sup> (2), K83E<sup>e</sup> (1), R92K<sup>e</sup> (9), Y94H<sup>e</sup> (2)</b>                                                                                                                                                                                                          |
| Eastern (N=7)            | R142G <sup>a</sup> (1), S144K <sup>a</sup> (1), K160T <sup>b</sup> (2), P194L <sup>b</sup> (2), S198P <sup>b</sup> (1), H311Q <sup>c</sup> (1), S96N <sup>d</sup> (2), N121K <sup>d</sup> (2), N171K <sup>d</sup> (1), 203T <sup>d</sup> (2), <b>E62G<sup>e</sup> (1)</b> , K92R <sup>e</sup> (1)                                   | -                                                                                                                                                                                                          | -                                                                                                                                                                                                  | -                                                                                                                                                                                                                                                                                       | -                                                                                                                                                                                                                                                                                                         | -                                                                                                                                                                                                                                                                                                                                                                                                  |
| Northwest (N=3)          | -                                                                                                                                                                                                                                                                                                                                   | -                                                                                                                                                                                                          | -                                                                                                                                                                                                  | -                                                                                                                                                                                                                                                                                       | -                                                                                                                                                                                                                                                                                                         | -                                                                                                                                                                                                                                                                                                                                                                                                  |
| Western (N=9)            | R142K <sup>a</sup> (1), K160T <sup>b</sup> (1), P194L <sup>b</sup> (1), Q197R <sup>b</sup> (1), D53N <sup>c</sup> (1), S96N <sup>d</sup> (1), 203T <sup>d</sup> (1)                                                                                                                                                                 | <b>G142K<sup>a</sup> (1)</b> , K160T <sup>b</sup> (1), P194L <sup>b</sup> (1), <b>Q197R<sup>b</sup> (1)</b> , D53N <sup>c</sup> (1), K121N <sup>d</sup> (1), K171N <sup>d</sup> (1), 225D <sup>d</sup> (1) | K131T <sup>a</sup> (1), K160T <sup>b</sup> (1), P194L <sup>b</sup> (1), <b>Q197R<sup>b</sup> (1)</b> , D53N <sup>c</sup> (1), 300I <sup>c</sup> (1), S96N <sup>d</sup> (1), Q261R <sup>e</sup> (1) | <b>S138A<sup>a</sup> (1), G142K<sup>a</sup> (1), K144S<sup>a</sup> (1), A128T<sup>b</sup> (1), S159Y<sup>b</sup> (1), K160T<sup>b</sup> (1), N190D<sup>b</sup> (1), S193F<sup>b</sup> (1), Q197R<sup>b</sup> (1), D53N<sup>c</sup> (1), Q311H<sup>c</sup> (1), N91S<sup>e</sup> (1)</b> | K131T <sup>a</sup> (1), <b>G142K<sup>a</sup> (1)</b> , K160T <sup>b</sup> (1), I186G <sup>b</sup> (1), <b>Q197R<sup>b</sup> (1)</b> , D53N <sup>c</sup> (1), Q311H <sup>c</sup> (1), K121N <sup>d</sup> (1), K171N <sup>d</sup> (1), F219S <sup>d</sup> (1), G62E <sup>e</sup> (1), R92K <sup>e</sup> (1) | F137S <sup>a</sup> (1), S138A <sup>a</sup> (1), <b>G142K<sup>a</sup> (1)</b> , A128T <sup>b</sup> (1), K135T <sup>b</sup> (1), I160T <sup>b</sup> (1), V186G <sup>b</sup> (1), S193F <sup>b</sup> (1), Q197R <sup>b</sup> (1), D53N <sup>c</sup> (1), Q311H <sup>c</sup> (1), K121N <sup>d</sup> (1), K171N <sup>d</sup> (1), N225D <sup>d</sup> (1), G62E <sup>e</sup> (1), R92K <sup>e</sup> (1) |
| HA not recovered (N= 19) | -                                                                                                                                                                                                                                                                                                                                   | -                                                                                                                                                                                                          | -                                                                                                                                                                                                  | -                                                                                                                                                                                                                                                                                       | -                                                                                                                                                                                                                                                                                                         | -                                                                                                                                                                                                                                                                                                                                                                                                  |

SH= Southern hemisphere vaccine. NH= Northern hemisphere vaccine. SNH= vaccine shared for both Southern and Northern hemispheres. A(H3N2) HA1 antigenic sites are A=a, B=b, C=c, D=d, and E=e as described by Wiley and Skehel, 1987. The frequency of an amino acid substitution observed at a given antigenic site in Uganda HA1 proteins is reported as (n). The substitutions in **BOLD** are unique between subgroups relative to the vaccine of a given season. Amino acid substitutions against the NH vaccine strains are coloured **brown** for visualization purposes only. Recommended vaccines for each influenza season are adopted from the World Health Organization (WHO, <https://www.who.int/teams/global-influenza-programme/vaccines/who-recommendations>).

**Supplementary Table 4 (continued): Antigenic drift among successfully sequenced Uganda A(H3N2) viruses (N=99) from 2010-2020 season vaccine viruses, recommended for the Southern (SH), Northern (NH) hemisphere or both (SNH), by cases, gender, age, and geographical region. Hemagglutinin (HA) sequences were not recovered for 19 H1N1pdm09 viruses.**

**Supplementary Table 5: Amino acid substitutions (AASs) in the complete HA, NA, and MP protein sequences of Uganda A(H1N1)pdm09 viruses compared to Southern and Northern Hemisphere vaccines viruses**

| Season                    | Vaccine: Passage, Genetic clade (Hemisphere) | No. of Uganda viruses analysed (year sampled) | Total unique AAS; Average AAS per gene | Mean AA identity (%) (range) | Virulence         | Strong/Mild drug resistance | Host specificity shift                  | Antigenic drift/ Escape mutant                                                           | Creates/Removes potential glycosylation site | Structural protein interactions: host cell receptor binding, binding small ligand(s), viral oligomerization interfaces, and antibody recognition sites                                                                                                                                                                                                                                                                                                                                                                                                                                                                                                                                                                                                                                                                                                     | Other                                                                                                                                                |
|---------------------------|----------------------------------------------|-----------------------------------------------|----------------------------------------|------------------------------|-------------------|-----------------------------|-----------------------------------------|------------------------------------------------------------------------------------------|----------------------------------------------|------------------------------------------------------------------------------------------------------------------------------------------------------------------------------------------------------------------------------------------------------------------------------------------------------------------------------------------------------------------------------------------------------------------------------------------------------------------------------------------------------------------------------------------------------------------------------------------------------------------------------------------------------------------------------------------------------------------------------------------------------------------------------------------------------------------------------------------------------------|------------------------------------------------------------------------------------------------------------------------------------------------------|
| <b>Hemagglutinin (H1)</b> |                                              |                                               |                                        |                              |                   |                             |                                         |                                                                                          |                                              |                                                                                                                                                                                                                                                                                                                                                                                                                                                                                                                                                                                                                                                                                                                                                                                                                                                            |                                                                                                                                                      |
| 2010 - 2016               | A/California/7/2009: Clade 1 (SNH)           | 77 (2010 - 2016)                              | 78; 11.12                              | 97.85 (96.99-98.94)          | E391K:61 (14,886) | P100S+:76 (24,202)          | R269K:1(7), A151T:10(259), D239E:4(669) | S200P:10(4,314), N142D:1(382), S145P:3(376), S207V:23(1), K180I:5(122), K180Q:12(10,222) |                                              | N458K:1(59), A13T:1(8119), A203T:1(491), A214T:1(1673), A273T:12(10192), A90T:1(39), D103E:1(47), D103N:1(76), D114N:58(12545), D518E:1(83), D52N:1(111), E373A:1(132), E516K:58(10435), E516Q:1*, F12L:1(162), G56R:1(45), H143Y:2(80), H155Q:1(223), H155R:24 (92), H290Y:1(92), I166M:1(8), I233V:7(394), I284T:4 (27), I303L:1(29), I303V:7(154), I303X:1*, I341V:2(38), I392V:1(43), I435V:2(83), I517V:1(3), I74T:1(13), K180I:17(122), K180Q:12(10222), K300E:44(10978), K419R:2(31), K475E:1(17), K475R:1(27), M274V:1(28), N146D:1(997), N245S:2(15), N458K:1(59), P135X:1*, P199Q:1(21), P288S:1(175), R222K:9(979), R62K:1(211), S101I:1(73), S101N:1(8254), S160G:2(1209), S202T:54(12381), S468N:54(11516), S86P:2(154), T137A:1(813), T258K:3(4), V251I:10(721), V289A:2(227), V289I:15(194), V36I:3(256), V444I:2(34), V47X:1*, V64I:1(184) | I338V@:75(22,922), P100S@:76(24,062), S220T@:77(22,514), I533V:1(13), L58I:1(4), L8M:1(389), R526K:23(67), V266L:33(491), V537A:24(1303), V6A:1(200) |
| 2017-2018                 | A/Michigan/45/2015: E3, Clade 6B.1 (SNH)     | 30 (2017- 2018)                               | 15; 4.87                               | 99.09 (98.76-99.65)          |                   |                             | R240Q+:30 (8,199)                       | K53N+:1(10), K159R:1(43), R240Q:30(8,199)                                                | T295X <sup>R</sup> :1*                       | A278D:1(12), I113V:3(24), I303V:1(84), I312V:27(4637), K516E:1(50), N472S:1(32), S181T:11(4546), S91R:27(4628), T137A:23(724), V36I:1 (32)                                                                                                                                                                                                                                                                                                                                                                                                                                                                                                                                                                                                                                                                                                                 | R526G:1(1)                                                                                                                                           |
| 2019                      | A/Michigan/45/2015: E3, Clade 6B.1 (SH)      | 11 (2018)                                     | 8; 5.18                                | 99.07 (98.94-99.29)          |                   |                             | R240Q+:11(8,199)                        | R240Q:11(8,199)                                                                          | T295X <sup>R</sup> :1*                       | I303V:1(84), I312V:11(4637), N472S:1(32), S181T:11(4546), S91R:11(4628), T137A:10(724)                                                                                                                                                                                                                                                                                                                                                                                                                                                                                                                                                                                                                                                                                                                                                                     |                                                                                                                                                      |
|                           | A/Brisbane/02/2018: E3, Clade 6B.1A.1 (NH)   |                                               | 9; 6.18                                | 98.9 (98.76-99.12)           |                   |                             | R240Q+:11(4,003)                        | P200S:11(501), R240Q:11(4,003)                                                           | T295X <sup>R</sup> :1*                       | A299P:11(3501), G62R:11(3430), I303V:1(66), N472S:1(31), T137A:10(687), V315I:11(3519)                                                                                                                                                                                                                                                                                                                                                                                                                                                                                                                                                                                                                                                                                                                                                                     |                                                                                                                                                      |
| <b>Neuraminidase (N1)</b> |                                              |                                               |                                        |                              |                   |                             |                                         |                                                                                          |                                              |                                                                                                                                                                                                                                                                                                                                                                                                                                                                                                                                                                                                                                                                                                                                                                                                                                                            |                                                                                                                                                      |

|                                   |                                                  |                       |             |                            |                     |                                                                                                                                                                                   |  |                                                                                                   |                                                                                                                       |                                                                                                                                                                                                                                                                                                                                                                                                                                               |                                                                                                                                                                                                                                                                                                                                     |
|-----------------------------------|--------------------------------------------------|-----------------------|-------------|----------------------------|---------------------|-----------------------------------------------------------------------------------------------------------------------------------------------------------------------------------|--|---------------------------------------------------------------------------------------------------|-----------------------------------------------------------------------------------------------------------------------|-----------------------------------------------------------------------------------------------------------------------------------------------------------------------------------------------------------------------------------------------------------------------------------------------------------------------------------------------------------------------------------------------------------------------------------------------|-------------------------------------------------------------------------------------------------------------------------------------------------------------------------------------------------------------------------------------------------------------------------------------------------------------------------------------|
| 2010-2016                         | A/California/7/2009;<br>Clade1 (SNH)             | 2010 - 2016<br>(n=76) | 62; 7.7     | 98.04<br>(96.8-<br>99.57)  | I365T:1(335)        | Y155H <sup>S</sup> :2(63),<br>V267A <sup>S*</sup> :1(13),<br>I117M <sup>M</sup> :2(325),<br>N248D <sup>*</sup> :75(17,<br>494),<br>N248X:1*,<br>V106I <sup>*</sup> :32(9,34<br>1) |  | I365T:1(335),<br>A343T:1(4),<br>N200S:44(8,216)<br>, K432E:27<br>(7,632),<br>N369K:59(10,32<br>4) | A343T:1(4),<br>N44S <sup>C</sup> :45(9,073)<br>(8,932),<br>P272T <sup>C</sup> :2(2),<br>N386K <sup>R</sup> :23(7,307) | A76T:1(62), A86V:1(90), C49Y:1(4),<br>F115L:1(14), F74S:1(868),<br>G382R:2(49), G454S:1(61),<br>I321V:27(7785), I389K:9(477),<br>I389T:1(74), K262R:2(18), K84E:1(7),<br>K84R:5(16), L85I:1(184),<br>N141S:1(12), N270K:1(6648),<br>N397K:3(458), P93H:1(520),<br>Q313R:9(174), R220K:9(199),<br>S299A:1(166), S339L:2(91),<br>S339P:1(50), T452I:5(947),<br>V166I:14(71), V264I:1(6530),<br>V394I:27(367), V448L:1(4), V453X:1*,<br>Y353X:1* | N248D <sup>@</sup> :75(17,352),<br>V106I <sup>@</sup> :32(9,340), A20T:1(43),<br>A20V:5(23), E47G:1(65),<br>I314M:5(6320), I34V:27(7468),<br>I359M:1(11), I46T:1(135),<br>I46V:1(39), L40I:24(7058),<br>N42D:1(32), N71X:1*,<br>Q43K:2(117), Q45H:2(71),<br>S442G:1(5), S82P:3(591),<br>T9I:2(69), V13I:1(6574),<br>V241I:59(10391) |
| 2017-2018                         | A/Michigan/45/2015:<br>E3, Clade 6B.1 (SNH)      | 2017-2018<br>(n=30)   | 20; 6.5     | 98.47<br>(98.08-<br>99.79) | I365T:23(18<br>6)   |                                                                                                                                                                                   |  | I365T:23(186),<br>S366I:1(4),<br>I396V:1(26)                                                      |                                                                                                                       | A75V:1(22), D416N:24(1566),<br>G454D:1(10), G77R:27(3978),<br>I108M:1(2), I188T:27(3819),<br>K260E:1(3), N449D:27(4082),<br>P93H:1(520), L412S:1*, S366I:1(4),<br>T72I:24(311), V234I:3(12)                                                                                                                                                                                                                                                   | Q45P:1*, T16A:1(9),<br>T362I:1(3), V80M:1(497),<br>V81A:27(3936)                                                                                                                                                                                                                                                                    |
| 2019                              | A/Michigan/45/2015:<br>E3, Clade 6B.1 (SH)       | 2018 (n=11)           | 16; 7.73    | 98.34<br>(98.08-<br>98.51) |                     |                                                                                                                                                                                   |  | I365T:10(186),<br>S366I:1(4)                                                                      |                                                                                                                       | A75V:1(22), D416N:11(1566),<br>G454D:1(10), G77R:11(3978),<br>I108M:1(2), I188T:11(3819),<br>K260E:1(3), N449D:11(4082),<br>S366I:1(4), T72I:11(311)                                                                                                                                                                                                                                                                                          | Q45P:1*, T16A:1(9),<br>T362I:1(3), V80M:1(497),<br>V81A:11(3936)                                                                                                                                                                                                                                                                    |
|                                   | A/Brisbane/02/2018:<br>E3, Clade 6B.1A.1<br>(NH) |                       | 13; 4.73    | 98.97<br>(98.72-<br>99.15) |                     |                                                                                                                                                                                   |  | I365T:10(161),<br>S366I:1(2)                                                                      |                                                                                                                       | A75V:1(17), D416N:11(1511),<br>G454D:1(7), I108M:1(1), K260E:1(2),<br>S366I:1(2), T72I:11(276)                                                                                                                                                                                                                                                                                                                                                | Q45P:1*, T13I:11(3647),<br>T16A:1(5), T362I:1*,<br>V80M:1(469)                                                                                                                                                                                                                                                                      |
| <b>Matrix Protein (M1 and M2)</b> |                                                  |                       |             |                            |                     |                                                                                                                                                                                   |  |                                                                                                   |                                                                                                                       |                                                                                                                                                                                                                                                                                                                                                                                                                                               |                                                                                                                                                                                                                                                                                                                                     |
| 2010-2016                         | A/California/7/2009;<br>Clade1 (SNH)             | 2010 - 2016<br>(n=79) | 16; 2.7     | 98.95<br>(97.73-<br>100)   |                     |                                                                                                                                                                                   |  | N133S:1(43),<br>E16G:1(52),<br>G89D:1(14)                                                         |                                                                                                                       | A33T:1(9), D21G:50(6871),<br>D21V:2(323)                                                                                                                                                                                                                                                                                                                                                                                                      | A227T:1(187),<br>K230R:45(7509),<br>M192V:45(7395),<br>Q208K:1(6028), T167A:1(74),<br>V80I:54(8507), E14G:4(448),<br>R18K:6(98), T11I:1(77),<br>Y76F:1(2)                                                                                                                                                                           |
| 2017-2018                         | A/Michigan/45/2015:<br>E3, Clade 6B.1 (SNH)      | 2017-2018<br>(n=30)   | 4; 0.23     | 99.86<br>(97.73-100)       |                     |                                                                                                                                                                                   |  |                                                                                                   |                                                                                                                       | F55L:1(12), I28F:3                                                                                                                                                                                                                                                                                                                                                                                                                            | E204X:1*, M203I:1(7)                                                                                                                                                                                                                                                                                                                |
| 2019                              | A/Michigan/45/2015:<br>E3, Clade 6B.1 (SH)       | 2018 (n=11)           | 1; 0.09     | 99.95<br>(98.86-<br>100)   |                     |                                                                                                                                                                                   |  |                                                                                                   |                                                                                                                       | F55L:1(12)                                                                                                                                                                                                                                                                                                                                                                                                                                    |                                                                                                                                                                                                                                                                                                                                     |
|                                   | A/Brisbane/02/2018:<br>E3, Clade 6B.1A.1<br>(NH) |                       | 2018 (n=11) | 2; 1.09                    | 99.75<br>(99.6-100) |                                                                                                                                                                                   |  |                                                                                                   |                                                                                                                       |                                                                                                                                                                                                                                                                                                                                                                                                                                               | F55L:1(2)                                                                                                                                                                                                                                                                                                                           |

Data are in n or n (%), unless otherwise indicated. AA= Amino acid. AAS= Amino acid substitutions. SH= Southern hemisphere vaccine. HN= Northern hemisphere vaccine. SNH= vaccine strain shared by both the Southern and Northern hemispheres for a given influenza season. Vaccine virus passage history indicated as indicated by FluSurver. The number of unique amino acid substitutions observed in all proteins sequences and per protein sequence are represented as N; n. The number of times a substitution is observed in the Uganda virus proteins and globally is reported in **bold** and (bracket) if available, respectively. Substitutions are colour-coded based on their known or predicted level of biological relevance. **Red** substitutions are the most significant (interestlevel=3) as they alter virulence, cause strong drug resistance and reverse premature stop codon in PB1-F2. The **Orange** (significant, interestlevel=2) occur at drug binding sites, affect host specificity and cause antigenic shift and mild drug resistance. **Magenta** (significant, interestlevel=2) adds or removes glycosylation sites. **Blue** substitutions (moderately significant, interestlevel=1) are involved at sites of interaction such as host cell receptor binding, binding small ligand(s), viral oligomerization interfaces, and antibody recognition sites. The **Green** substitutions (least significant, interestlevel=0) are common to subtypes while Black (least significant with warnlevel=0) have no known effects. Superscript symbol definitions: “\*\*” = AAS reported for the first time (current global frequency = 0). “+” = AAS have their function reported in combination with others. “R” = AAS removes a potential glycosylation site. “C” = AAS creates a potential glycosylation site. “S” = AAS causes strong drug resistance. “M” = AAS causes mild drug resistance. “@” = AAS is a common subtype marker. Amino acid substitutions with multiple functions reported were indicated under all functions as appropriate. For substitutions observed for the first time (global frequency=0), their biological relevance (functions) were reported based on the functions of their equivalent positions in the resolved protein structures.

**Supplementary Table 5: Amino acid substitutions in the complete protein sequences of HA (H1), NA (N1) and MP (M1 and M2) of Uganda A(H1N1)pdm09 viruses compared to Southern and Northern Hemisphere vaccines.** Amino acid similarity between protein sequences, amino acid substitutions and their corresponding global frequencies and functions were obtained from Flusurver (<http://flusurver.bii.a-star.edu.sg>; accessed on 24<sup>th</sup> September 2021). The highest number of unique substitutions in the H1 was 78, 62 in N1, and 16 in MP observed in 2010-2016 viruses against the A/California/7/2009 vaccine strain.

**Supplementary Table 6: Amino acid substitutions (AASs) in the complete HA, NA, and MP protein sequences of Uganda A(H3N2) viruses compared to Southern and Northern Hemisphere vaccines viruses**

| Season                    | Vaccine: Passage, Genetic clade (Hemisphere) | No. of Uganda viruses analysed (year sampled) | Total unique AAS; Mean number of AAS per gene (total substitution s/number of sequences) | Mean AA similarity (%) (range) | Virulence & Host specificity shift | Virulence & Antigenic drift / Escape mutant                              | Antigenic drift / Escape mutant                                                                                     | Strong/Mild drug resistance                                      | Host specificity shift                                                                                                                                            | Creates/Removes potential glycosylation site                                                                                                   | Structural protein interactions: host cell receptor binding, binding small ligand(s), viral oligomerization interfaces, and antibody recognition sites                                                                                                                                                                                                                                                                               | Other                |
|---------------------------|----------------------------------------------|-----------------------------------------------|------------------------------------------------------------------------------------------|--------------------------------|------------------------------------|--------------------------------------------------------------------------|---------------------------------------------------------------------------------------------------------------------|------------------------------------------------------------------|-------------------------------------------------------------------------------------------------------------------------------------------------------------------|------------------------------------------------------------------------------------------------------------------------------------------------|--------------------------------------------------------------------------------------------------------------------------------------------------------------------------------------------------------------------------------------------------------------------------------------------------------------------------------------------------------------------------------------------------------------------------------------|----------------------|
| <b>Hemagglutinin (H3)</b> |                                              |                                               |                                                                                          |                                |                                    |                                                                          |                                                                                                                     |                                                                  |                                                                                                                                                                   |                                                                                                                                                |                                                                                                                                                                                                                                                                                                                                                                                                                                      |                      |
| 2010-2011                 | A/Perth/16/2009: A/Perth/16 clade (SNH)      | 25 (2010 – 2011)                              | 37; 9.72                                                                                 | 98.13 (96.29-98.94)            | <b>A154S:1</b> (3,152)             | <b>A214S:15</b> (20,232), <b>A214P:1</b> (769), <b>N161S:24</b> (205,17) | <b>I156K*:1</b> (97), <b>K160N:25</b> (8,203), <b>R158G:1</b> (7,817), <b>K78E:25</b> (21,726)                      |                                                                  | <b>S230I:25</b> (24,366), <b>K99E*:1</b> (168), <b>A212T:1</b> (6), <b>I208V:3</b> (53), <b>T144A*:1</b> (5,294), <b>F175S:1</b> (2,979), <b>N241D:1</b> (16,616) | <b>K160N<sup>C</sup>:25</b> (8,203), <b>T144A<sup>R</sup>:1</b> (5,294), <b>S61N<sup>C</sup>:7</b> (20,569)                                    | <b>A492T:3</b> (71), <b>D503N:15</b> (698), <b>Y9C:1</b> (2141), <b>D69N:1</b> (2328), <b>G291S:2</b> (23), <b>I258V:1</b> (139), <b>I422V:2</b> (4959) <b>I434V:1</b> (62), <b>K280R:1</b> (58), <b>K2M:1*</b> , <b>L199H:25</b> (24599), <b>N294K:1</b> (20201), <b>N328S:15</b> (20443), <b>T64I:1</b> (20194), <b>P305S:2</b> (35), <b>Q49R:1</b> (19595), <b>R285K:2</b> (87), <b>T228A:25</b> (22524), <b>V239I:16</b> (21153) | <b>I538M:1</b> (189) |
| 2012                      | A/Perth/16/2009: A/Perth/16 clade (SH)       | 16 (2012)                                     | 28; 11.13                                                                                | 97.83 (96.82-98.76)            |                                    | <b>A214S:8</b> (20,232), <b>N161S:8</b> (205,17)                         | <b>I156K*:1</b> (97), <b>K160N:16</b> (8,203), <b>R158G:5</b> (7,817), <b>K78E:16</b> (21,726)                      |                                                                  | <b>S230I:13</b> (24,366), <b>T144A*5</b> (5,294), <b>S230V:3</b> (30)                                                                                             | <b>K160N<sup>C</sup>:16</b> (8,203), <b>S140N<sup>R</sup>:1</b> (145), <b>S61N<sup>C</sup>:13</b> (20,569), <b>T144A<sup>R</sup>:5</b> (5,294) | <b>D503N:3</b> (698), <b>D505N:2</b> (15949), <b>Y9C:5</b> (2141), <b>I258V:1</b> (139), <b>K280R:8</b> (58), <b>T64I:5</b> (20194), <b>L199H:16</b> (24599), <b>L19V:1</b> (9), <b>N137K:1</b> (5034), <b>N294K:5</b> (20101), <b>N328S:8</b> (20443), <b>Q49R:5</b> (19595), <b>S25R:1</b> (6), <b>S278N:3</b> (336), <b>T228A:16</b> (22524), <b>V14G:1</b> (57), <b>V239I:8</b> (21153)                                          |                      |
|                           | A/Victoria/361/2011: Clade 3C.1 (NH)         |                                               | 27; 9.75                                                                                 | 98.26 (97.88-98.41)            |                                    | <b>S214A:8</b> (778), <b>N161S:8</b> (20,312)                            | <b>I156K*:1</b> (90), <b>Q172H:16</b> (21,478), <b>V202G:16</b> (21,412), <b>R158G:5</b> (7,721)                    |                                                                  | <b>I230V:3</b> (26)                                                                                                                                               | <b>N61S<sup>R</sup>:3</b> (1,230), <b>S140N<sup>R</sup>:1</b> (126), <b>T144A<sup>R</sup>:5</b> (5,288)                                        | <b>D503N:3</b> (520), <b>D505N:2</b> (15778), <b>H9C:5</b> (2129), <b>H9Y:11</b> (18463), <b>I239V:9</b> (678), <b>I64T:11</b> (1384), <b>K280R:8</b> (55), <b>L19V:1</b> (6), <b>N137K:1</b> (5023), <b>N294K:5</b> (20024), <b>Q49R:5</b> (19541), <b>S25R:1</b> (5), <b>S278N:3</b> (316), <b>S328N:11</b> (1241), <b>V14G:1</b> (54), <b>Y235S:16</b> (20668)                                                                    |                      |
| 2013                      | A/Victoria/361/2011: Clade 3C.1 (SH)         | 6 (2013)                                      | 21; 11                                                                                   | 97.99 (97.35-98.41)            |                                    | <b>L173S:1</b> (710), <b>N161S:8</b> (20,312)                            | <b>I156K*:1</b> (90), <b>Q172H:6</b> (21,478), <b>V202G:6</b> (21,412), <b>N138S:1</b> (31), <b>R158G:6</b> (7,721) | <b>S107G<sup>M</sup>:1</b> (11), <b>N138S<sup>M</sup>:1</b> (31) | <b>I230T:1</b> (200), <b>Q213H:1</b> (240),                                                                                                                       | <b>S140N<sup>R</sup>:1</b> (126), <b>T144A<sup>R</sup>:6</b> (5,288)                                                                           | <b>D69N:1</b> (1223), <b>H9Y:6</b> (18463), <b>I422V:1</b> (4955), <b>L19V:1</b> (6), <b>N294K:6</b> (20024), <b>Q49R:6</b> (19541), <b>V313I:1</b> (19), <b>V363M:1</b> (1382), <b>Y235S:6</b> (20668)                                                                                                                                                                                                                              |                      |
|                           | A/Texas/50/2012: E5, Clade 3C.1 (NH)         |                                               | 18; 8                                                                                    | 98.49 (97.88-98.94)            |                                    | <b>P214S:6</b> (19,232), <b>L173S:1</b> (709), <b>N161S:6</b> (19,737)   | <b>V202G:6</b> (20,336), <b>I156K*:1</b> (90), <b>N138S:1</b> (30), <b>R158G:6</b> (7,663)                          | <b>S107G<sup>M</sup>:1</b> (10), <b>N138S<sup>M</sup>:1</b> (30) | <b>I230T:1</b> (197), <b>Q213H:1</b> (240), <b>T144A*:6</b> (5,281)                                                                                               | <b>N138S<sup>R</sup>:1</b> (30), <b>S140N<sup>R</sup>:1</b> (122)                                                                              | <b>D69N:1</b> (962), <b>F235S:6</b> (19566), <b>I422V:1</b> (4952), <b>L19V:1</b> (6), <b>V313I:1</b> (13) <b>V363M:1</b> (1343)                                                                                                                                                                                                                                                                                                     |                      |

|               |                                                                      |                    |           |                            |                                        |                                                                |                                                                                                                                                                                    |                                                              |                                                                                                                                                                            |                                                                                                                                                                                                                      |                                                                                                                                                                                                                                                                                                                                                                                                                                                                                                                                                                                                    |              |
|---------------|----------------------------------------------------------------------|--------------------|-----------|----------------------------|----------------------------------------|----------------------------------------------------------------|------------------------------------------------------------------------------------------------------------------------------------------------------------------------------------|--------------------------------------------------------------|----------------------------------------------------------------------------------------------------------------------------------------------------------------------------|----------------------------------------------------------------------------------------------------------------------------------------------------------------------------------------------------------------------|----------------------------------------------------------------------------------------------------------------------------------------------------------------------------------------------------------------------------------------------------------------------------------------------------------------------------------------------------------------------------------------------------------------------------------------------------------------------------------------------------------------------------------------------------------------------------------------------------|--------------|
| 2014          | A/Texas/50/2012:<br>E5, Clade 3C.1<br>(SNH)                          | 11 (2014)          | 17; 8     | 98.56<br>(96.23-<br>98.76) | A154S:1(3,132<br>)                     | P214S:10(19,232),<br>N161S:11(19,737)                          | I156K*:1(90),<br>V202G:11(20,336),<br>E78K:1(562),<br>R158G:11(7,663)                                                                                                              |                                                              | F175S:1(2,973),<br>N241D:1<br>(16,534),<br>N144A*:11(5,281<br>)                                                                                                            |                                                                                                                                                                                                                      | A16T:3(432), F235S:11(19596),<br>I10V:1(47), K342R:1(2804),<br>L19I:1(15632), L19V:6(6),<br>N137D:1(244)                                                                                                                                                                                                                                                                                                                                                                                                                                                                                           |              |
| 2015          | A/Switzerland/971<br>5293/2013: E4/E2,<br>clade 3C.3a (SNH)          | 14 (2015)          | 40; 11.57 | 97.76<br>(97.17-<br>99.29) | L173S:1 (599),<br>S154A:13(14,3<br>09) |                                                                | G158K:2(4,110),<br>G158R:4(6,837),<br>V202G:14(17,342),<br>I156I*:8(16,900),<br>I156K*:6(77)<br>N160K:1(2,812),<br>N160S:6(12,395),<br>K176T:6(12,943)                             | S107N <sup>M</sup> +:1(2,099)                                | D241N:7(928),<br>I230T:1 (189),<br>Q213R:2(1,111),<br>S175F:7 (1,050),<br>S175Y:6<br>(13,393),<br>K176T:6<br>(12,943)                                                      | K176T <sup>C</sup> :6<br>(12,943),<br>A144T <sup>C</sup> :6(13,268<br>)<br>,<br>N160K <sup>R</sup> :1(2,812)<br>,<br>N160S <sup>R</sup> :6(12,395<br>)<br>, S140N <sup>R</sup> :1(79),<br>S140R <sup>R</sup> :1 (24) | A122T:1(50), D307N:1(19),<br>D505N:7(15149), D69N:3(576),<br>F15S:1(71), G65S:1(23),<br>L19F:1(5), L19I:7(15473),<br>L19V:4(6), L443I:1(8),<br>M184V:2(37), N187H:1*,<br>N461S:1(8), Q327H:6(10839),<br>R342K:13(14234), S25N:1(106),<br>S278N:1(295), S281G:1(8),<br>X235S:14*, V104I:1(89),<br>Y9C:1(2123)                                                                                                                                                                                                                                                                                       |              |
| 2016-<br>2017 | A/Hong<br>Kong/4801/2014:<br>E5/E2, clade 3C.2a<br>(SNH)             | 27 (2016-<br>2017) | 67; 11.85 | 97.73<br>(96.82-<br>98.94) | A154S:1(3,053<br>)                     | S214A:2(56),<br>S214P:7(721),<br>S161N:2(135),<br>L173S:1(561) | H172Q:1(20),<br>R158K:5(4,107),<br>I156K*:9(73),<br>S160N:13(1,585),<br>N138D:1(813),<br>E78G:1(1,492),<br>E78K:1(556),<br>R158G:12(6,183),<br>S160K:2(2,812),<br>K176T:14(12,910) | S107N <sup>M</sup> +:1(2,099),<br>N138D <sup>M</sup> :1(813) | K99E*:1 (129),<br>A212T:2(1),<br>D241N:7(667),<br>I230T:3 (187),<br>Q213R:5(1,111),<br>Y175F:7 (774),<br>Y175S:6 (2,916),<br>T144A*:11<br>(3,861),<br>K176T:14(12,91<br>0) | T56K <sup>R</sup> :1*,<br>S160N <sup>C</sup> :13(1,585<br>)<br>,<br>N138D <sup>R</sup> :1(813),<br>S140N <sup>R</sup> :1(76),<br>T144A <sup>R</sup> :11<br>(3,861),<br>T151K <sup>R</sup> :2(1,734)                  | A492T:1(45), C12R:1(8),<br>D509E:1(4), D69E:2(89),<br>D69N:7(556), G291S:1(14),<br>G495E:2(1139), G500E:1(4620),<br>G94D:2(167), H327Q:18(6034),<br>I19L:10(1585), I19V:3(6),<br>I239V:2(49), I41V:1(50),<br>I422V:7(4946), I50V:1,<br>I64T:2(122), K108R:5(2729),<br>K223Q:1(15), K275R:1(29),<br>P210L:27(17061), K292R:1(24),<br>K294N:2(97), K342R:6(2776),<br>K519R:1(16), N137K:9(4986),<br>N187K:7(5198), N461S:5(8),<br>R49Q:2(358), N505D:12(1319),<br>V14G:2(44), Q91H:2(139),<br>R421G:1*, S162G:1(9),<br>S112N:26(16974), S278N:1(293),<br>S328N:8(487), V363M:1(887),<br>Y110H:2(266) | I538M:2(165) |
| 2018          | A/Singapore/INFIM<br>H-16-0019/2016:<br>E5/E1, Clade<br>3C.2a1 (SNH) | 13 (2017)          | 50; 14.38 | 97.01<br>(95.94-<br>98.76) | A154S:5(2,275<br>)                     | S214A:2(33),<br>S214P:5(237),<br>S161N:2(49)                   | G158K:1(3,675),<br>G158R:7(3,133),<br>H172Q:1(9),<br>S160N:7(119),<br>N138D:2(340),<br>K176T:6 (9,104),<br>I156K*:5(31)                                                            | N138D <sup>M</sup> :2(340)                                   | A212T:2(1),<br>D241N:2(18),<br>I230T:2 (149),<br>Q213R:1(719),<br>Y175F:2 (44),<br>K99E*:1 (116),<br>T144A*:5<br>(2,457), K176T:7<br>(9,104), Y175S:5<br>(2,168)           | S160N <sup>C</sup> :7(119),<br>N138D <sup>R</sup> : 2(340),<br>T144A <sup>R</sup> :5<br>(2,457),<br>T151K <sup>R</sup> :2(1,705)<br>T56K <sup>R</sup> :1*                                                            | A492T:1(17), D69E:1(88),<br>D69N:2(419), E495G:11(10312),<br>E500G:8(7151), G291S:1(7),<br>G94D:2(152), H327Q:10(4665),<br>I19L:7(134), I239V:2(40),<br>I41V:1(29), I64T:2(40),<br>K108R:3(2703), K137N:8(6402),<br>K187N:8(6613), K275R:1(15),<br>K292R:2(16), K294N:2(40),<br>K342R:5(2161), N461S:1(4),<br>N505D:7(120), P210L:13(11545),<br>Q91H:1(127), R421G:1*,<br>R49Q:2(260), S162G:1(6),<br>S328N:7(119), V422I:8(6819),<br>Y110H:2(137)                                                                                                                                                 | I538M:2(151) |

|                           |                                                   |                  |           |                        |                    |                                                                 |                                                                                                                                                                       |                                                             |                                                                                                                                                                                 |                                                                                                                                                      |                                                                                                                                                                                                                                                                                                                                                                                                                                                                        |                                                |
|---------------------------|---------------------------------------------------|------------------|-----------|------------------------|--------------------|-----------------------------------------------------------------|-----------------------------------------------------------------------------------------------------------------------------------------------------------------------|-------------------------------------------------------------|---------------------------------------------------------------------------------------------------------------------------------------------------------------------------------|------------------------------------------------------------------------------------------------------------------------------------------------------|------------------------------------------------------------------------------------------------------------------------------------------------------------------------------------------------------------------------------------------------------------------------------------------------------------------------------------------------------------------------------------------------------------------------------------------------------------------------|------------------------------------------------|
| 2019                      | A/Switzerland/8060/2017: E5/E1, Clade 3C.2a2 (SH) | 13 (2017)        | 54; 16.08 | 97.04<br>(96.29-98.59) | A154S:5(1,938)     | S214A:2(22),<br>S214P:5(76),<br>S161N:2(25)                     | H172Q:1(3),<br>K147T:13 (2,515),<br>K158R:7 (239),<br>I156K*:5(27),<br>S160N:7(11),<br>N138D:2(47),<br>K158G:5 (3,050),<br>K176T:6(3,244)                             | N138D <sup>M</sup> :2(47)                                   | A212T:2*,<br>D241N:2(1),<br>I230T:2 (95),<br>Q213R:1(429),<br>Y175F:2 (24),<br>K99E*:1 (113),<br>Y175S:5(1,846),<br>K176T:6(3,244)                                              | T144A <sup>R</sup> :5<br>(2,124),<br>T151K <sup>R</sup> :2(528)<br>T56K <sup>R</sup> :1*                                                             | A492T:1(10), D69E:1(2),<br>D69N:2(134),<br>G291S:1(6), G495E:2(77),<br>G500E:5(1016), G94D:2(47),<br>H327Q:10(3210), I19L:7(24),<br>I239V:2(23), I41V:1(15),<br>I422V:5(1355), I64T:2(24),<br>K108R:3(1485), K275R:1(6),<br>K292R:1(9) K294N:2(24),<br>K342R:5(1839), N137K:5(1425),<br>N187K:5(1384), N461S:1(2),<br>N505D:7(23), P210L:13(5215),<br>Q277R:13(3206), Q91H:1(21),<br>R421G:1*, R49Q:2(199),<br>S112N:13(5185), S162G:1(6),<br>S328N:7(27), Y110H:2(66) | I538M:2(129)                                   |
|                           | A/Kansas/14/2017: E5, Clade 3C.3a (NH)            |                  | 57; 18.46 | 96.55<br>(95.58-97.88) | S154A:8(3,435)     | S214A:2(22),<br>S214P:5(76),<br>S209F:13(3,398),<br>S161N:2(25) | G158K:1(2,052),<br>G158R:7(251),<br>H172Q:1(3),<br>I156K*:5(27),<br>S160N:7(11),<br>N138D:2(50),<br>K160S:6(3,409),<br>K176T:6(3,404)                                 | N138D <sup>M</sup> :2(50),<br>N107S <sup>M</sup> :13(3,513) | N206D:13(5,378)<br>,<br>A212T:2*,<br>D241N:2(1),<br>I230T:2 (96),<br>Q213R:1(432),<br>S175F:2 (44),<br>S175Y:6 (3,505),<br>K176T:6(3,404),<br>A144T*:8(3,250),<br>K99E*:1 (113) | N138D <sup>R</sup> :2(50),<br>T151K <sup>R</sup> :2(541),<br>T262N <sup>C</sup> :13(5,382)<br>, T56K <sup>R</sup> :1*                                | A492T:1(10), C9Y:13(3471),<br>D69E:1(2), D69N:2(136),<br>G291S:1(6), G495E:2(80),<br>G500E:5(1030), G94D:2(50),<br>I19L:7(24), I239V:2(23),<br>I41V:1(17), I422V:5(1369),<br>I64T:2(24), K108R:3(1509),<br>K275R:1(6), K292R:1(11),<br>K294N:2(24), M494I:13(3562),<br>N137K:5(1441), N187K:5(1400),<br>N461S:1(2), N505D:7(23),<br>Q327H:3(2157), Q91H:1(21),<br>R342K:8(3539), R421G:1*,<br>R49Q:2(199), S162G:1(6),<br>S328N:7(28), Y110H:2(69)                     | I538M:2(130)                                   |
| 2020                      | A/South Australia/34/2019: E5, Clade 3C.2a1b (SH) | 13 (2017)        | 56; 18.69 | 96.36<br>(95.23-98.41) | A154S:5<br>(1,252) | S214A:2*,<br>S214P:5(89),<br>S161N:2(4)                         | G158K:1(2),<br>G158R:7(13),<br>H172Q:1(2),<br>I202G:13(1,954),<br>K147T:13 (1,312),<br>I156K*:5(1),<br>S160N:7(59),<br>N138D:2(3),<br>K176T:6(930),<br>G78E:13(1093), | N138D <sup>M</sup> :2(3)                                    | A212T:2*,<br>D241N:2*,<br>I230T:2 (9),<br>Q213R:1(416),<br>Y175F:2*,<br>K99E*:1 (122),<br>Y175S:5(1,075)                                                                        | S160N <sup>C</sup> :7(59),<br>N138D <sup>R</sup> :2(3),<br>T144A <sup>R</sup> :5<br>(1,288),<br>T151K <sup>R</sup> :2(252),<br>T56K <sup>R</sup> :1* | A492T:1*, D69E:1(2),<br>D69N:2(46), E500G:8(1491),<br>F235S:13(1467), G291S:1(1),<br>G495E:2(8), G78E:13(1093),<br>G94D:2(2), I19L:7*, I239V:2*,<br>I41V:1(5), I64T:2*, K137N:8(899),<br>K187N:8(1077), K275R:1*,<br>K292R:1(1), K294N:2(2),<br>K342R:5(1067), M363V:13(1437),<br>N461S:1*, N505D:7*,<br>Q327H:3(11), Q91H:1(16),<br>R108K:10(1087), R421G:1*,<br>R49Q:2(82), S162G:1(2),<br>S328N:7(2), V422I:8(1092),<br>Y110H:2*                                    | I538M:2(117),<br>I545V:13(1326)                |
| <b>Neuraminidase (N2)</b> |                                                   |                  |           |                        |                    |                                                                 |                                                                                                                                                                       |                                                             |                                                                                                                                                                                 |                                                                                                                                                      |                                                                                                                                                                                                                                                                                                                                                                                                                                                                        |                                                |
| 2010-2011                 | A/Perth/16/2009: A/Perth/16 clade (SNH)           | 25 (2010 - 2011) | 32; 5.8   | 98.61<br>(97.02-99.36) |                    |                                                                 | E221D:1(12,941),<br>K369T:23(17,155),<br>S367N:23 (17,347)                                                                                                            | D251N <sup>M</sup> :1(16)                                   |                                                                                                                                                                                 | N402D <sup>R</sup> :24(15,970),<br>S331R <sup>R</sup> :11(592)                                                                                       | D127T:1*, D339A:2(1),<br>D93G:1(14174), G414D:1(24),<br>I26T:3(205), I26V:1(496),                                                                                                                                                                                                                                                                                                                                                                                      | F42L:1(33),<br>L81P:16(15783),<br>M51V:1(544), |





|                            |                                                   |                  |           |                        |  |  |  |  |  |  |                                                                                               |                                                                                                                                     |                                                                                                                    |                                                                                                                                                                                                                                               |                                                                                                                      |
|----------------------------|---------------------------------------------------|------------------|-----------|------------------------|--|--|--|--|--|--|-----------------------------------------------------------------------------------------------|-------------------------------------------------------------------------------------------------------------------------------------|--------------------------------------------------------------------------------------------------------------------|-----------------------------------------------------------------------------------------------------------------------------------------------------------------------------------------------------------------------------------------------|----------------------------------------------------------------------------------------------------------------------|
|                            | E5/E1, Clade 3C.2a1 (SNH)                         |                  |           |                        |  |  |  |  |  |  | N86H <sup>R</sup> :1(1),<br>S331R <sup>R</sup> :5(135)                                        | I307M:1(155), K249E:5(14),<br>K267T:7(225), L338S:5(70),<br>L464I:1(5), N339D:10(1062),<br>Q273R:5(15), T95A:6(16),<br>V380I:7(432) | P55T:1(4),<br>P81L:2(3),<br>P81S:1(52),<br>V303I:1(1461)                                                           |                                                                                                                                                                                                                                               |                                                                                                                      |
| 2019                       | A/Switzerland/8060/2017: E5/E2, Clade 3C.2a2 (SH) | 13 (2017)        | 31; 11.46 | 96.78<br>(95.74-99.36) |  |  |  |  |  |  | D221E <sup>+</sup> :2*,<br>S329N:11(81),<br>K220R:1(2)                                        | N245S <sup>M+</sup> :7(28),<br>T247S <sup>M+</sup> :7(11)                                                                           | S329N <sup>C</sup> :11(81),<br>N245S <sup>R</sup> :7(28),<br>D402N <sup>C</sup> :2 (1),<br>N86H <sup>R</sup> :1(1) | G93D:2(93), H347N:1(2),<br>H468P:7*, I26V:1(5), I307M:1(89),<br>K249E:5*, K267T:7(11),<br>L338S:5(2), L464I:1(3),<br>M176I:11(2932), N339D:10(33),<br>Q273R:5(1), S331R:5(8),<br>S386P:13(1595), T95A:6(4),<br>V380I:7(114)                   | I30V:1(7),<br>M51V:5(11),<br>N43Y:2*,<br>P55T:1(1),<br>P81L:2(2),<br>P81S:1(12),<br>V194I:13(4235),<br>V303I:1(1106) |
|                            | A/Kansas/14/2017: E5, Clade 3C.3a (NH)            |                  | 35; 13.85 | 96.49<br>(95.31-98.72) |  |  |  |  |  |  | D221E <sup>+</sup> :2*,<br>T329N:11(89),<br>K220R:1(2),<br>K344E:13(1,819),<br>T329S:2(2,519) | T247S <sup>M+</sup> :7(12),<br>N245S <sup>M+</sup> :7(29),<br>A149V <sup>M</sup> :13(2,578),<br>H155Y <sup>S</sup> :13(2,598)       | T329N <sup>C</sup> :11(89),<br>N245S <sup>R</sup> :7(29),<br>D402N <sup>C</sup> :2 (1),<br>N86H <sup>R</sup> :1(1) | G93D:2(102), H347N:1(2),<br>H468P:7*, I140L:13(2592),<br>I176M:2(1431), I26V:5(5),<br>I307M:1(89), K249E:5*,<br>K267T:7(12), L338S:5(2),<br>L464I:1(3), N339D:10(36),<br>Q273R:5(1), R75K:13(2623),<br>S331R:5(8), T95A:6(4),<br>V380I:7(117) | I30V:1(7),<br>M51V:5(11),<br>N43Y:2*,<br>P55T:1(2),<br>P81L:2(2),<br>P81S:1(12),<br>V303I:1(1103)                    |
| 2020                       | A/South Australia/34/2019: E5, Clade 3C.2a1b (SH) | 13 (2017)        | 33; 13.46 | 96.55<br>(95.74-98.72) |  |  |  |  |  |  | D221E <sup>+</sup> :2*,<br>S329N:11(9),<br>N220K:12(1,116),<br>N220R:1(1),<br>K344E:13(84)    | T247S <sup>M+</sup> :7*,<br>N245S <sup>M+</sup> :7(5)                                                                               | S329N <sup>C</sup> :11(9),<br>N245S <sup>R</sup> :7(5),<br>D402N <sup>C</sup> :2 (3),<br>N86H <sup>R</sup> :1*     | G93D:2(85), H347N:1*,<br>H468P:7(2), I176M:2(40),<br>I26V:5(4), I307M:1(21), K249E:5*,<br>K267T:7*, L126P:13(1105),<br>L338S:5*, L464I:1(3),<br>N339D:10(7), Q273R:5(1),<br>R315S:13(1223), S331R:5(7),<br>T95A:6(2), V380I:7(59)             | I303V:12(1118),<br>I30V:1*,<br>M51V:5(4),<br>N43Y:2*,<br>P55T:1*,<br>P81L:2(1),<br>P81S:1(7)                         |
| Matrix Protein (M1 and M2) |                                                   |                  |           |                        |  |  |  |  |  |  |                                                                                               |                                                                                                                                     |                                                                                                                    |                                                                                                                                                                                                                                               |                                                                                                                      |
| 2010-2011                  | A/Perth/16/2009: A/Perth/16 clade (SNH)           | 25 (2010 - 2011) | 6; 0.28   | 99.86<br>(98.86-100)   |  |  |  |  |  |  |                                                                                               |                                                                                                                                     | G16E:1(759)                                                                                                        | P25Q:1(8), M93I:1(3), K98R:1,<br>L40F:1*                                                                                                                                                                                                      | D88E:1(26),<br>R18K:2(43)                                                                                            |
| 2012                       | A/Perth/16/2009: A/Perth/16 clade (SH)            | 17 (2012)        | 4; 0.82   | 99.55<br>(98.86-100)   |  |  |  |  |  |  |                                                                                               |                                                                                                                                     |                                                                                                                    | F48S:1(217), K98R:1(6),<br>R61G:3(13)                                                                                                                                                                                                         | D88E:9(26)                                                                                                           |
|                            | A/Victoria/361/2011: Clade 3C.1 (NH)              |                  | 4; 0.82   | 99.55<br>(98.86-100)   |  |  |  |  |  |  |                                                                                               |                                                                                                                                     |                                                                                                                    | F48S:1(210), K98R:1(5),<br>R61G:3(15)                                                                                                                                                                                                         | D88E:9(20)                                                                                                           |
| 2013                       | A/Victoria/361/2011: Clade 3C.1 (SH)              | 7 (2013)         | 4; 0.57   | 99.78<br>(98.86-100)   |  |  |  |  |  |  |                                                                                               |                                                                                                                                     |                                                                                                                    | A33V:1(4), F48S:1(210),<br>L54V:1(185)                                                                                                                                                                                                        | V15I:1(48)                                                                                                           |
|                            | A/Texas/50/2012: E5, Clade 3C.1 (NH)              |                  | 4; 0.57   | 99.78<br>(98.86-100)   |  |  |  |  |  |  |                                                                                               |                                                                                                                                     |                                                                                                                    | A33V:1(3), F48S:1(209),<br>L54V:1(185)                                                                                                                                                                                                        | V15I:1(47)                                                                                                           |

|           |                                                             |                |          |                   |  |  |  |                                                      |             |                                                              |                                                                                                |
|-----------|-------------------------------------------------------------|----------------|----------|-------------------|--|--|--|------------------------------------------------------|-------------|--------------------------------------------------------------|------------------------------------------------------------------------------------------------|
| 2014      | A/Texas/50/2012: E5/E1, Clade 3C.1 (SNH)                    | 12 (2014)      | 4; 0.83  | 99.33 (96.59-100) |  |  |  |                                                      |             | F48S:7(209), I39M:1(16)                                      | E14G:1(24), T227A:1(27)                                                                        |
| 2015      | A/Switzerland/9715293/2013: E4/E2, clade 3C.3a (SNH)        | 14 (2015)      | 7; 1.21  | 99.14 (97.73-100) |  |  |  | V27A <sup>SM+</sup> :2(22),                          |             | F48S:7(208), I39M:3(16), L54V:1(147)                         | N20S:1(33), Q208R:1(8), T239A:2(25)                                                            |
| 2016-2017 | A/Hong Kong/4801/2014: E5/E3, clade 3C.2a (SNH)             | 29 (2016-2017) | 15; 1.38 | 99.08 (96.59-100) |  |  |  | V27A <sup>SM+</sup> :6(21),                          | G16E:7(483) | D21G:1(30), F48S:10(208), L54V:1(104), L59I:1(10), R61K:1(3) | E235K:1(8), K242R:1(1), N13D:1(1), N20S:1(32), R18K:1(35), T227A:1(5), T227N:1(5), T239A:6(23) |
| 2018      | A/Singapore/INFIM H-16-0019/2016: E5/E1, Clade 3C.2a1 (SNH) | 14 (2017)      | 8; 1.79  | 98.49 (96.59-100) |  |  |  | A27V <sup>SM+</sup> :13(6,981)                       | G16E:6(132) | D21G:1(21), R61K:1(3), F48S:1(14)                            | N20S:1(13), R18K:1(26), T239A:1(11)                                                            |
| 2019      | A/Switzerland/8060/2017: E5/E2, Clade 3C.2a2 (SH)           | 14 (2017)      | 8; 0.93  | 99.28 (97.72-100) |  |  |  | V27A <sup>SM+</sup> :1(1), G16E <sup>S+</sup> :6(24) | G16E:6(24)  | D21G:1(7), R61K:1(1), F48S:1(4)                              | N20S:1(6), R18K:1(8), T239A:1(5)                                                               |
|           | A/Kansas/14/2017: E5, Clade 3C.3a (NH)                      |                | 10; 2.86 | 97.48 (95.46-100) |  |  |  | I27A:1(1), I27V:13(2,635), G16E <sup>S+</sup> :6(24) | G16E:6(24)  | C52Y:14(2610), D21G:1(7), F48S:1(4), R61K:1(1)               | N20S:1(7), R18K:1(8), T239A:1(5)                                                               |
| 2020      | A/South Australia/34/2019: E5, Clade 3C.2a1b (SH)           | 14 (2017)      | 9; 1.93  | 98.34 (96.59-100) |  |  |  | V27A <sup>SM+</sup> :1*, G16E <sup>S+</sup> :6(15)   | G16E:6(15)  | D21G:1(2), F48S:1(2), R61K:1*, L25P:14(1393)                 | N20S:1(1), R18K:1(9), T239A:1(2)                                                               |

Data are in n or n (%), unless otherwise indicated. AA= Amino acid. AAS= Amino acid substitutions. SH= Southern hemisphere vaccine. HN= Northern hemisphere vaccine. SNH= vaccine strain shared by both the Southern and Northern hemispheres for a given influenza season. Vaccine virus passage history indicated as indicated by FluSurver. The total number of unique amino acid substitutions observed in all protein sequences and the mean number of substitutions per protein sequence are represented as N; n, where n = total number of amino acid substitutions divide by number of sequences analysed. The number of times a substitution is observed in the Uganda virus proteins and globally is reported in **bold** and (bracket) if available, respectively. Substitutions are colour-coded based on their known or predicted level of biological relevance. **Red** substitutions are the most significant (interestlevel=3) as they alter virulence, cause strong drug resistance and reverse premature stop codon in PB1-F2. The **Orange** (significant, interestlevel=2) occur at drug binding sites, affect host specificity and cause antigenic shift and mild drug resistance. **Magenta** (significant, interestlevel=2) adds or removes glycosylation sites. **Blue** substitutions (moderately significant, interestlevel=1) are involved at sites of interactions such as host cell receptor binding, binding small ligand(s), viral oligomerization interfaces, and antibody recognition sites. The **Green** substitutions (least significant, interestlevel=0) are common to subtypes while **Black** (least significant with warnlevel=0) have no known effects. Superscript symbol definitions: “**SM+**” = AAS reported for the first time (current global frequency = 0). “**S+**” = AAS have their function reported in combination with others. “**R**” = AAS removes a potential glycosylation site. “**C**” = AAS creates a potential glycosylation site. “**S**” = AAS causes strong drug resistance. “**M**” = AAS causes mild drug resistance. “**@**” = AAS is a common subtype marker. Amino acid substitutions with multiple functions reported were indicated under all functions as appropriate. For substitutions observed for the first time (global frequency=0), their biological relevance (functions) are reported based on the functions of their equivalent positions in the resolved protein structures.

**Supplementary Table 6: Amino acid substitutions in the complete protein sequences of HA (H3), NA (N2) and MP (M1 and M2) of Uganda A(H3N2) viruses compared to Southern and Northern Hemisphere vaccines.** Amino acid similarity, amino acid substitutions and their corresponding functions and frequencies were obtained from FluSurver (<http://flusurver.bii.a-star.edu.sg>; accessed on 24<sup>th</sup> September 2021).

**Supplementary Fig. 3: Multiple sequence alignment (MSA) of Uganda A(H3N2) M2 protein sequences with adamantine-susceptible A/New York/392/2004(H3N2)**

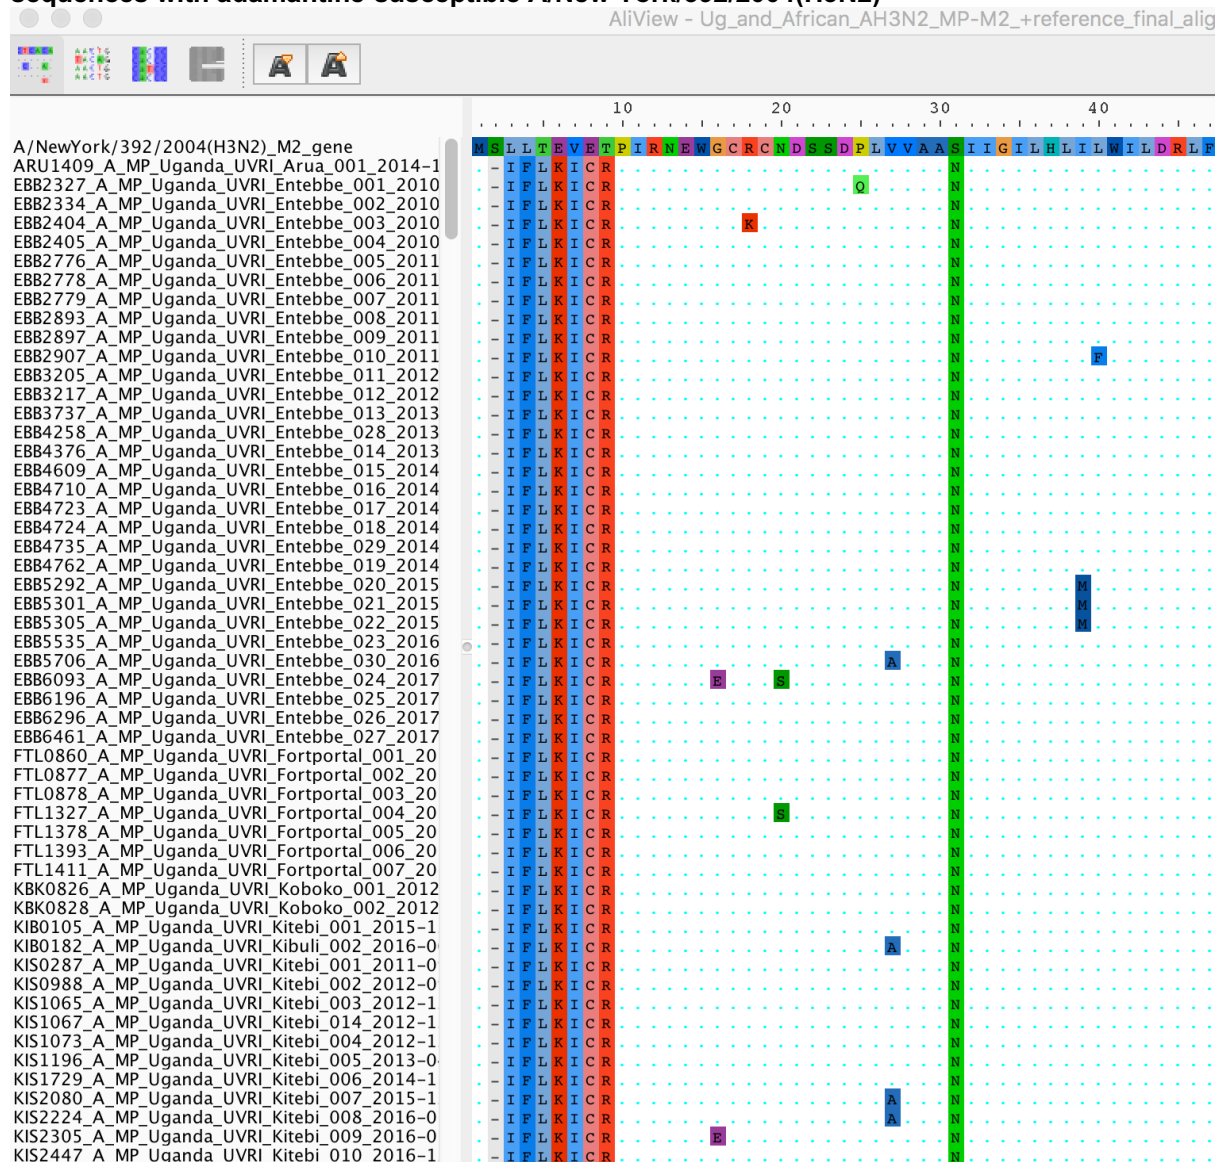

**Supplementary Fig. 3: Multiple sequence alignment of Uganda A(H3N2) M2 protein sequences with adamantine-susceptible A/New York/392/2004(H3N2) as a reference.** Substitutions with Alanine (A) and Asparagine (N) are observed in Uganda viruses at positions 27 and 31, respectively. Substitutions were visualized using AliView<sup>1</sup>.

**Supplementary Fig. 4: Phylogenies showing the spatial divergence Uganda influenza A viruses A(H1N1)pdm09**

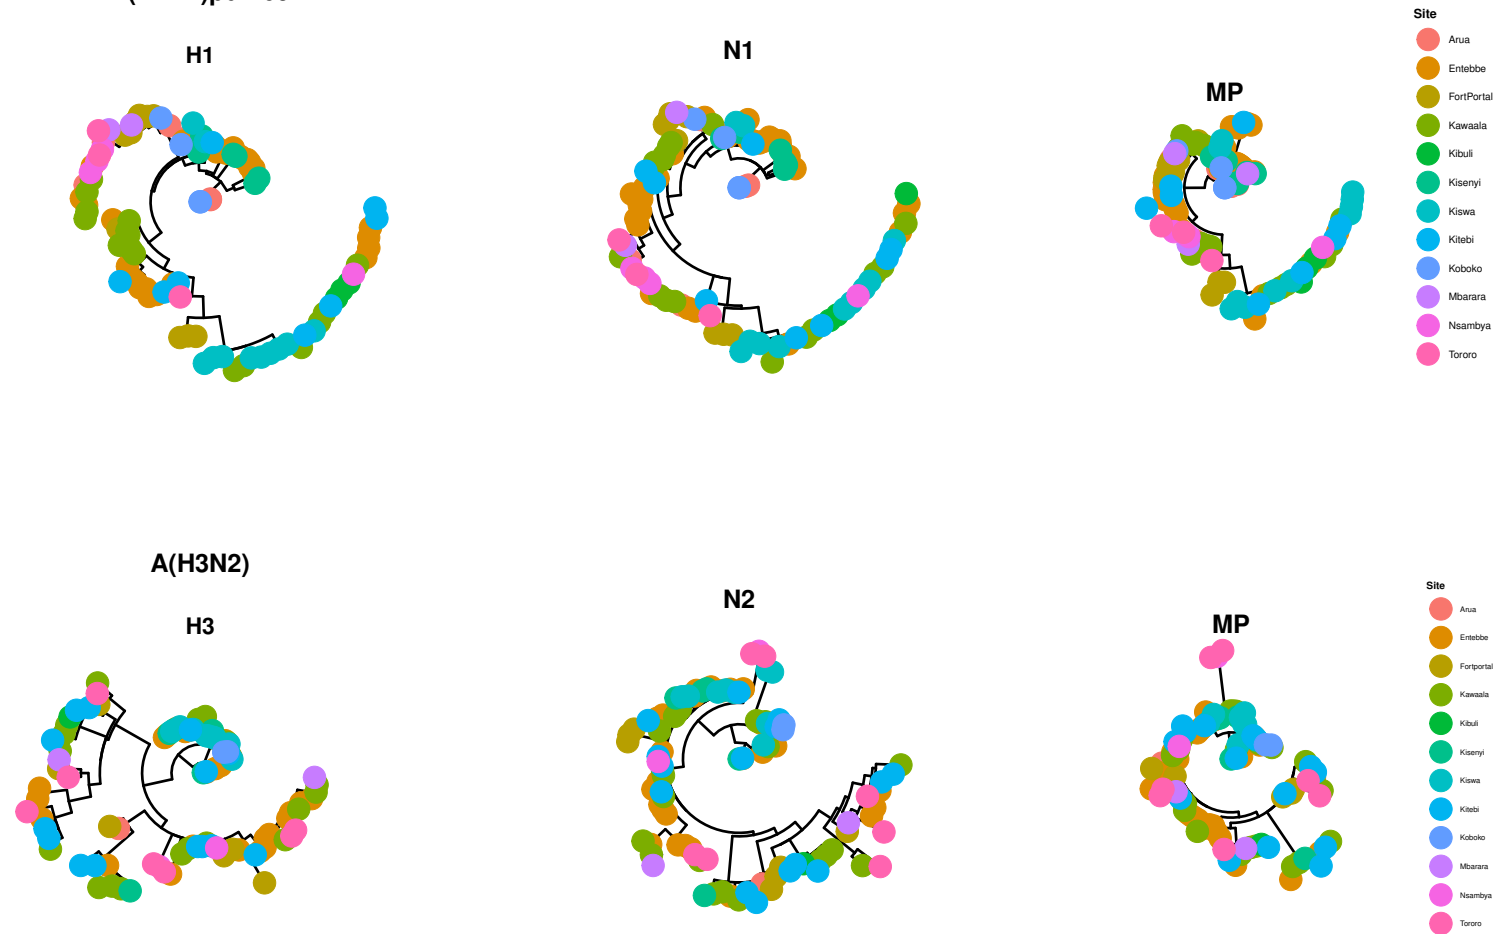

**Supplementary Fig. 4: Phylogenies showing the spatial divergence of the HA, NA and MP genes of Uganda A(H1N1)pdm09 (A) and A(H3N2) (B) influenza viruses collected from 2010 to 2018.** Trees were rooted using the oldest sequence in the Ugandan dataset. There was no uniqueness in viruses circulating in a given site or geographical region in all gene trees.



**Supplementary Fig. 5: Genetic clades of influenza A viruses that previously circulated in 2010-2018 in Uganda.** All labelled genetic clades (indicated by black bars) were inferred based on the signature amino acid substitutions in the HA1 protein (ECDC method), and for each clade these substitutions are indicated on the tree trunk in bold. **Panel A** shows genetic clades for 2010-2018 A(H1N1)pdm09 viruses. Novel clades H1-UG1 and H1-UG2 are indicated. Genetic clade 6 diverged into 6A, 6B, and 6C. All clade 3, 5, and 7 viruses were collected from Entebbe and Kampala (Central Uganda) and circulated in 2010-2011. **Panel B** shows genetic clades for 2010-2017 A(H3N2) viruses. A novel clade H3-UG1 characterized with 183H, 212A, 214I, and 289S is indicated. Clade 3 persisted in all the nine years while clade 7 re-emerged in 2017

**Supplementary Table 7: Details of influenza A viral genetic clades that circulated in Africa from 1994 to 2019**

| Count               | Genetic Clade           | Signature substitutions in the HA1 protein                                                   | Origin of viruses in the clade                                                                                         | Geographical region                           | Duration (years) clade viruses circulated | Genetic Clade  | Signature substitutions in the HA1 protein                                                | Origin of viruses in the clade                                                                                                         | Geographic al region                | Duration (years) clade viruses circulated |
|---------------------|-------------------------|----------------------------------------------------------------------------------------------|------------------------------------------------------------------------------------------------------------------------|-----------------------------------------------|-------------------------------------------|----------------|-------------------------------------------------------------------------------------------|----------------------------------------------------------------------------------------------------------------------------------------|-------------------------------------|-------------------------------------------|
| <b>A(H1N1)pdm09</b> |                         |                                                                                              |                                                                                                                        |                                               |                                           | <b>A(H3N2)</b> |                                                                                           |                                                                                                                                        |                                     |                                           |
| 1.                  | <b>3</b>                | A134T, S183P                                                                                 | Uganda                                                                                                                 | Eastern                                       | 2010-2011                                 | <b>2</b>       | N133D, R142G                                                                              | South Africa                                                                                                                           | Southern                            | 1994                                      |
| 2.                  | <b>5</b>                | D97N, R205K, I216V, V249L                                                                    | Kenya, Uganda                                                                                                          | Eastern                                       | 2011                                      | <b>3B</b>      | N145S, A198S, V223I, N312S, D158N                                                         | Kenya, Uganda                                                                                                                          | Eastern                             | 2010-2012                                 |
| 3.                  | <b>6</b>                | D97N, S185T                                                                                  | Kenya, Uganda                                                                                                          | Eastern                                       | 2010-2011                                 | <b>3C</b>      | T48I, N145S, V186G, A198S, V223I, N312S, D158N, N278K, Q33R, S45N                         | Uganda                                                                                                                                 | Eastern                             | 2012                                      |
| 4.                  | <b>6A</b>               | H138R, V249L                                                                                 | Uganda                                                                                                                 | Eastern                                       | 2013-2016                                 | <b>3C.2a</b>   | L3I, N145S, F159Y, Q311H, V186G, K160T, N225D, Q311H                                      | Kenya, Tanzania, Nigeria, South Africa, Mali, Burkina Faso, Ivory Coast, Ethiopia, Zambia, Uganda, Madagascar, Rwanda, Congo, Reunion, | Eastern, Western, Central, Southern | 2014-2017                                 |
| 5.                  | <b>6B</b>               | K163Q, A256T, K283E                                                                          | Congo, Egypt, Ethiopia, Madagascar, Mali, Mozambique, Nigeria, Rwanda, South Africa, Tanzania, Kenya, Uganda, Zambia   | Eastern, Western, Central, Northern, Southern | 2014-2018                                 | <b>3C.2a1</b>  | N171K, N121K, Q311H                                                                       | Congo, Mali, South Africa, Madagascar, Tanzania, Rwanda, Ethiopia, Reunion, Mayotte, Kenya                                             | Eastern, Western, Central, Southern | 2014-2016                                 |
| 6.                  | <b>6B.1</b>             | S84N, S162N, I216T                                                                           | Ethiopia, south Africa, Madagascar, Mali, Rwanda, Tanzania, Congo, Burkina Faso, Mozambique, Togo, Ivory Coast, Uganda | Eastern, Western, Central, Southern           | 2015-2018                                 | <b>3c.2a1a</b> | T135K, Q311H                                                                              | Uganda, South Africa, Togo, Niger, Nigeria Sierra Leone, Congo, Burkina Faso, Mali, Ivory Coast, Kenya                                 | Eastern, Western, Central, Southern | 2017-2019                                 |
| 7.                  | <b>6B.1A</b>            | S74R, S164T                                                                                  | South Africa, Kenya, Togo, Tanzania, Niger, Congo, Nigeria, Burkina Faso, Uganda                                       | Eastern, Western, Central, Southern           | 2017-2019                                 | <b>3C.2a1b</b> | K92R, E62G, R142G, H311Q                                                                  | Uganda, Tanzania, Madagascar, South Africa, Kenya, Mozambique, Niger, Nigeria, Mali, Burkina Faso, Togo, Ivory Coast,                  | Eastern, Western, Southern          | 2016-2019                                 |
| 8.                  | <b>6B.1A.1</b>          | S183P, S74R, and S164T (majority had additional R45G, P282A, I298V)                          | Mozambique, South Africa, Uganda                                                                                       | Eastern, Southern                             | 2018                                      | <b>3C.2a2</b>  | T131K, R142K, R261Q                                                                       | Nigeria, Tanzania, South Africa                                                                                                        | Eastern, Western, Southern          | 2017-2019                                 |
| 9.                  | <b>6B.1A.3</b>          | T120A, P137S, A141E, H273Y                                                                   | Kenya, Tanzania                                                                                                        | Eastern                                       | 2018                                      | <b>3C.2a3</b>  | N121K, S144K                                                                              | Ivory Coast, South Africa, Tanzania, Madagascar, Ethiopia, Togo, Kenya, Uganda                                                         | Eastern, Western, Southern          | 2015-2017                                 |
| 10.                 | <b>6B.1A.5a</b>         | S183P, N260D, N129D                                                                          | Madagascar, Tanzania, Congo, Burkina Faso                                                                              | Eastern, Western, Central                     | 2019                                      | <b>3C.3</b>    | T128A, R142G, N145S, S45N, T48I, A198S, V223I & N312S, Q33R                               | Uganda, Kenya, Congo                                                                                                                   | Eastern, Central                    | 2012-2016                                 |
| 11.                 | <b>6B.1A.5b</b>         | S183P, N260D, E235D                                                                          | Ivory Coast, Mali, Burkina Faso, Sierra Leone, Niger, Nigeria,                                                         | Western                                       | 2017-2018                                 | <b>3C.3a</b>   | A138S, F159S, N225D (some with S91N, N144K, F193S)                                        | Uganda, Ethiopia, Tanzania, Nigeria, Madagascar, Kenya, Togo                                                                           | Eastern, Western                    | 2011, 2014-2019                           |
| 12.                 | <b>6B.1A.6</b>          | S74R, T120A (some have T2K, A315V), these are closest to clade 6B.1A.5                       | Uganda, Kenya, Madagascar, Nigeria, South Africa,                                                                      | Eastern, Western, Southern                    | 2017-2018                                 | <b>3C.3b</b>   | T128A, R142G, N145S, L157S, S45N, T48I, A198S, V223I, N312S, Q33R                         | Kenya, Uganda                                                                                                                          | Eastern                             | 2013-2016                                 |
| 13.                 | <b>6B.1A.6 (-T120A)</b> | S74R, S164T (Some have S183P); viral sequences clustered within the 6B.1A.6 but lacked T120A | Tanzania, Congo, Uganda                                                                                                | Eastern, Central                              | 2017-2018                                 | <b>7</b>       | S45N, K62E, K144N, 145N, 186G, T212A, S214I, 183H, 212A, 289P                             | Kenya, Uganda,                                                                                                                         | Eastern                             | 2010-2012, 2017                           |
| 14.                 | <b>6B.2</b>             | V152T, V173I                                                                                 | Burkina Faso, South Africa                                                                                             | Western, Southern                             | 2015-2016                                 | <b>H3-UG1</b>  | N45S, K62E, K144N, 145N, 186G, T212A, S214I, L183H, S289P (viruses from Uganda had P289S) | Kenya, Senegal, Uganda                                                                                                                 | Eastern, Western                    | 2008-2010                                 |

|    |                                         |                                           |                                |                   |            |  |  |  |  |  |
|----|-----------------------------------------|-------------------------------------------|--------------------------------|-------------------|------------|--|--|--|--|--|
| 15 | 6C                                      | V234I, K283E                              | Uganda                         | Eastern           | 2013, 2015 |  |  |  |  |  |
| 16 | 7                                       | S143G, S185T, A197T                       | Uganda                         | Eastern           | 2011       |  |  |  |  |  |
| 17 | H1-UG1                                  | D222E, P83S (those from Uganda had I267T) | Egypt, Tanzania, Uganda, Kenya | Eastern, Northern | 2009-2011  |  |  |  |  |  |
| 18 | H1-UG2                                  | N97D, V321I, V249L, P83S, S185T           | Uganda                         | Eastern           | 2011       |  |  |  |  |  |
| 19 | A/Hong Kong/2212/2010 (H1N1) clade (HK) | V19I, N97D, S128P, N228S, I286V, I324V    | Uganda                         | Eastern           | 2010       |  |  |  |  |  |

**Supplementary Table 7: Details of influenza A viral genetic clades that circulated in Africa from 1994 to 2019. Africa viral sequences were classified into globally defined genetic clades based on signature amino acid substitutions in their HA1 proteins<sup>2</sup>. Table summarises clade results in Fig. 3 and Supplementary Fig. 5.**



**Supplementary Fig. 6: Phylogenetic clustering and clades of Uganda and other Africa A(H1N1)pdm09 viruses in the hemagglutinin gene**

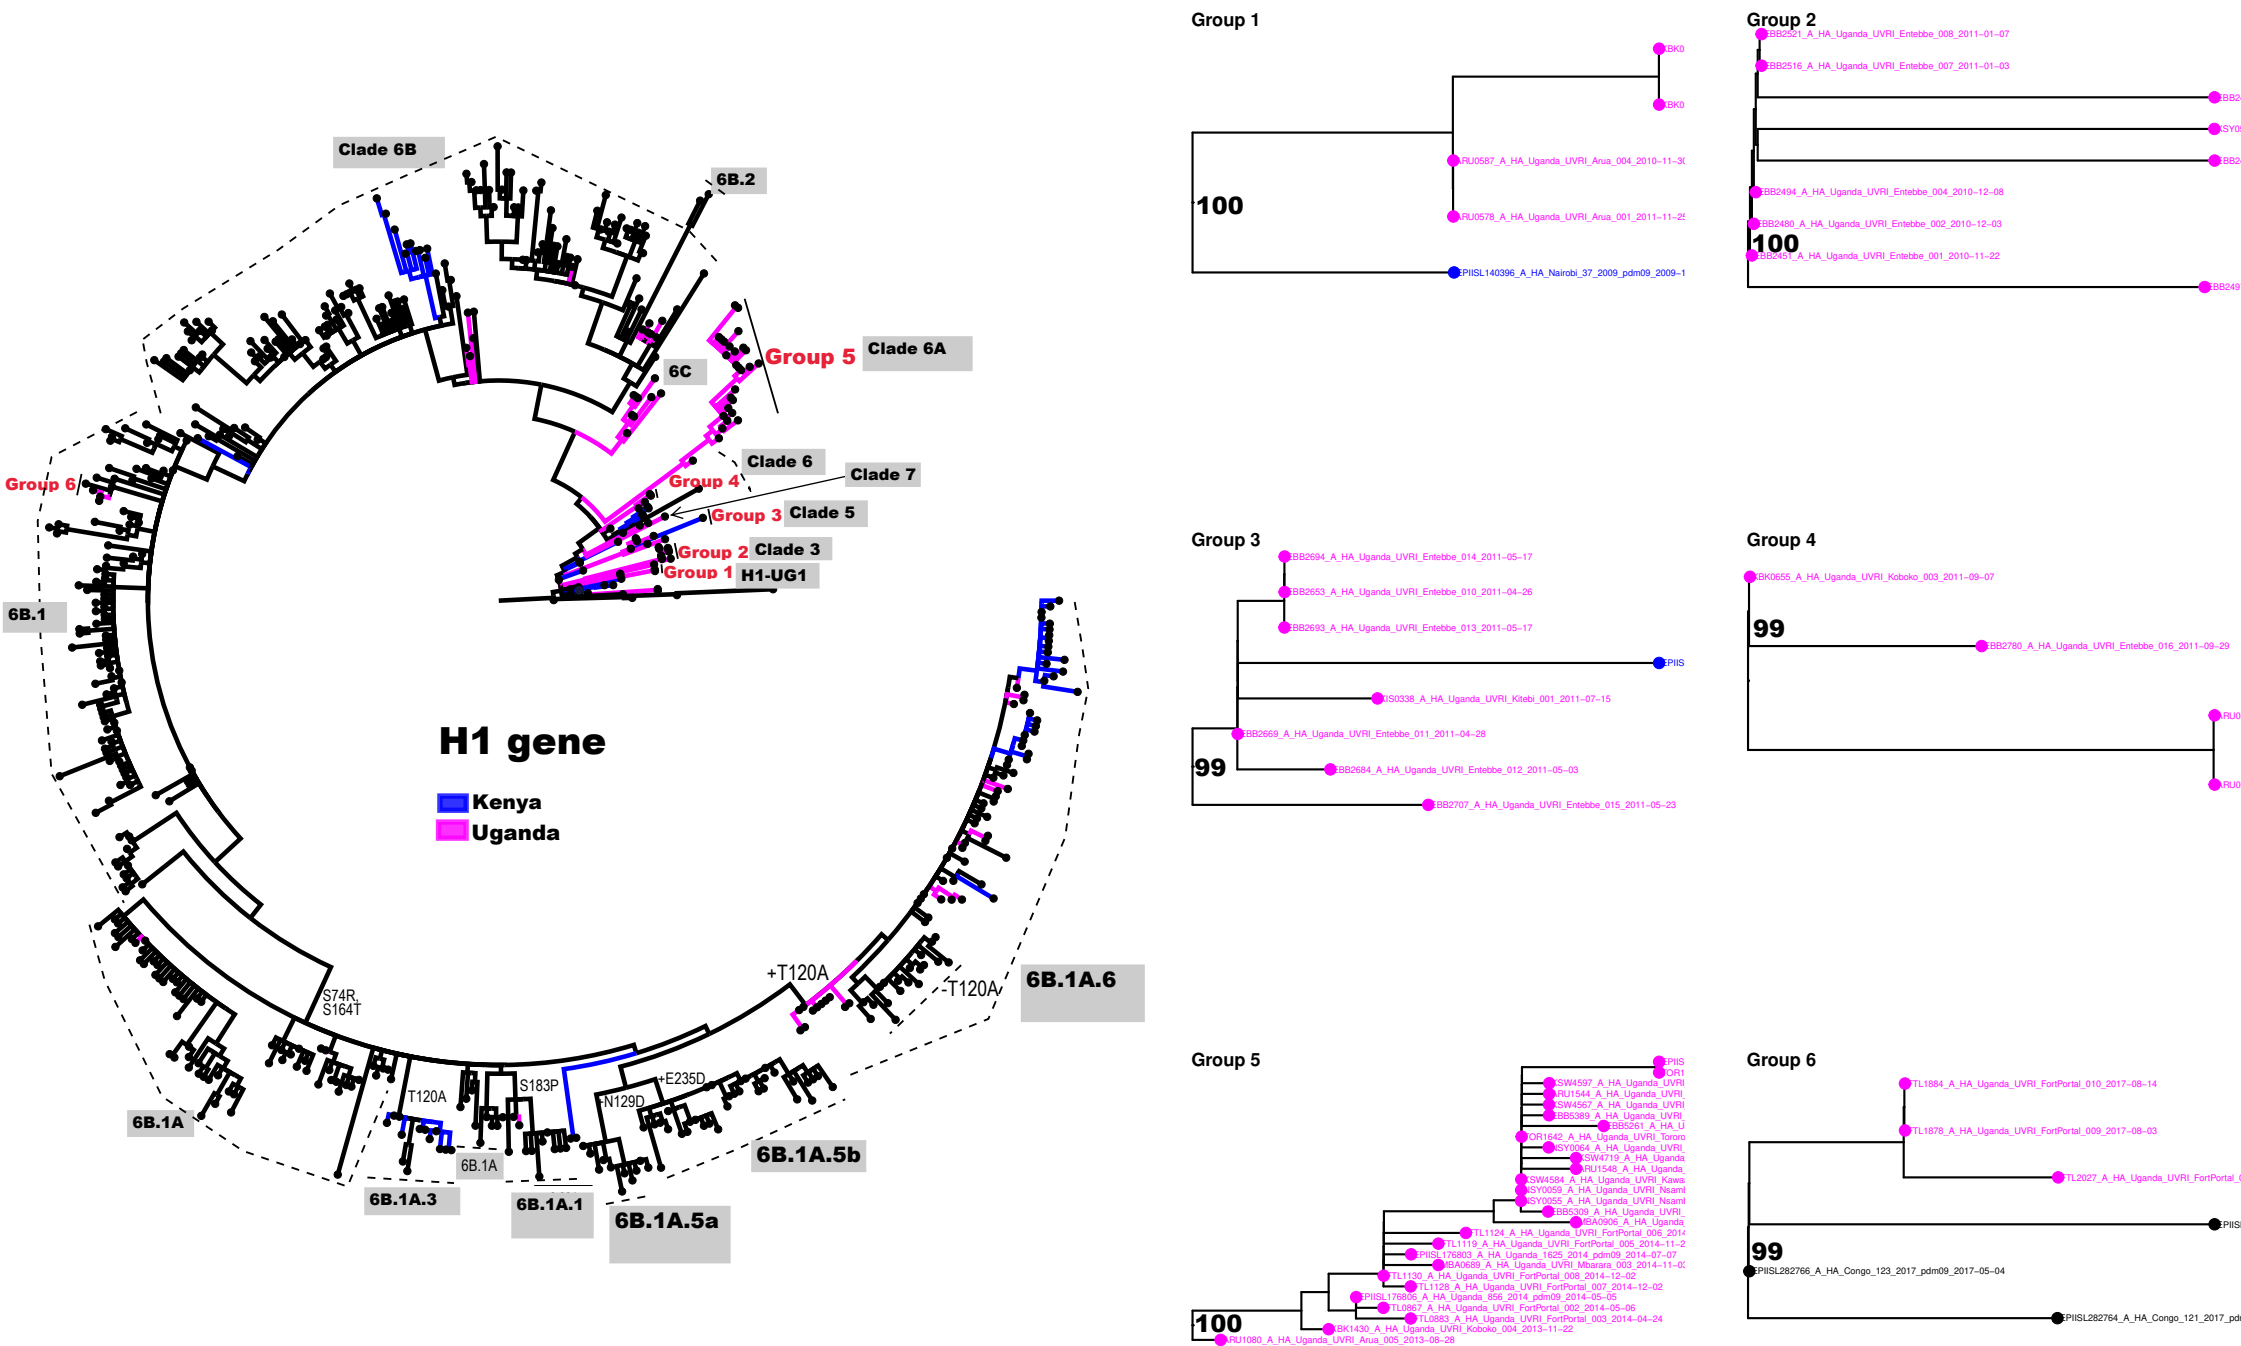

**Supplementary Fig. 6:** Phylogenetic clustering and clades of 2009-2018 Uganda A(H1N1)pdm09 viruses with other African viruses (2009-2019) in the HA (H1) gene. Groups are defined as highly supported phylogenetic clusters (bootstrap value equal or greater than 90%) with 3 or more Uganda virus sequences. All 6 groups are shown. Group details and 33 bootstrap support are described in Supplementary Table 8 below. H1-UG2 not shown but was close to clade 7 with only 2 (sequences EBB2904 and KSW2788).

**Supplementary Fig. 7: Phylogenetic clustering of Uganda and other Africa A(H1N1)pdm09 viruses in the neuraminidase gene**

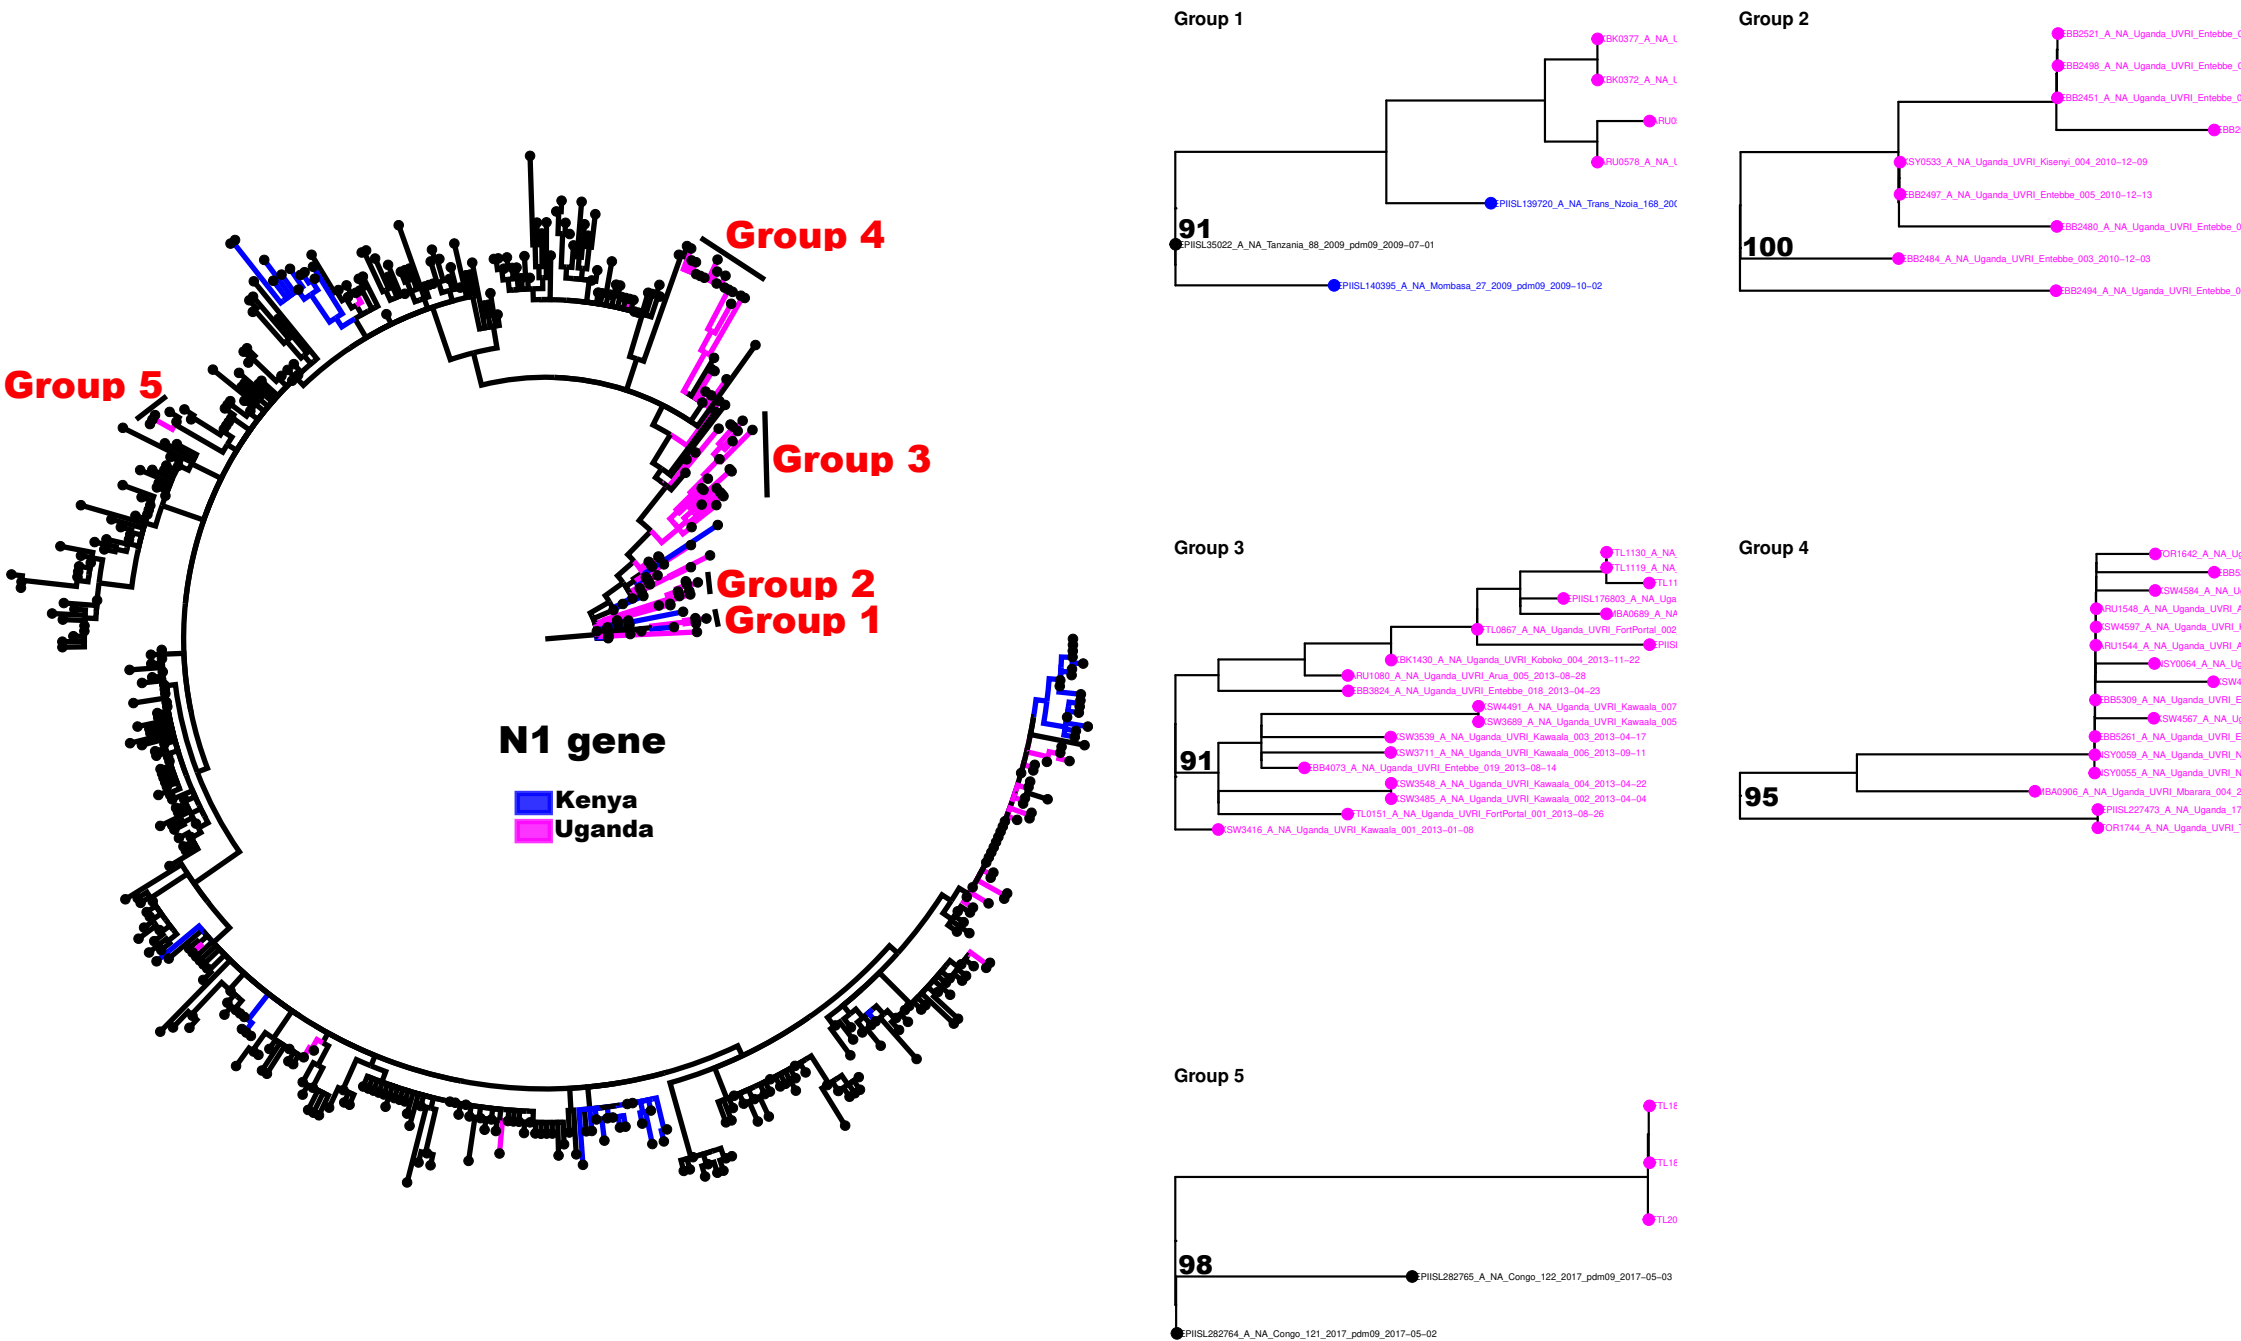

**Supplementary Fig. 7: Phylogenetic clustering of 2009-2018 Uganda A(H1N1)pdm09 viruses with other African viruses (2009-2019) in the NA (N1) gene. All 5 groups are shown. Group details support are described in Supplementary Table 8 below.**

Supplementary Fig. 8: Phylogenetic clustering of Uganda and other Africa A(H1N1)pdm09 viruses in the matrix protein gene

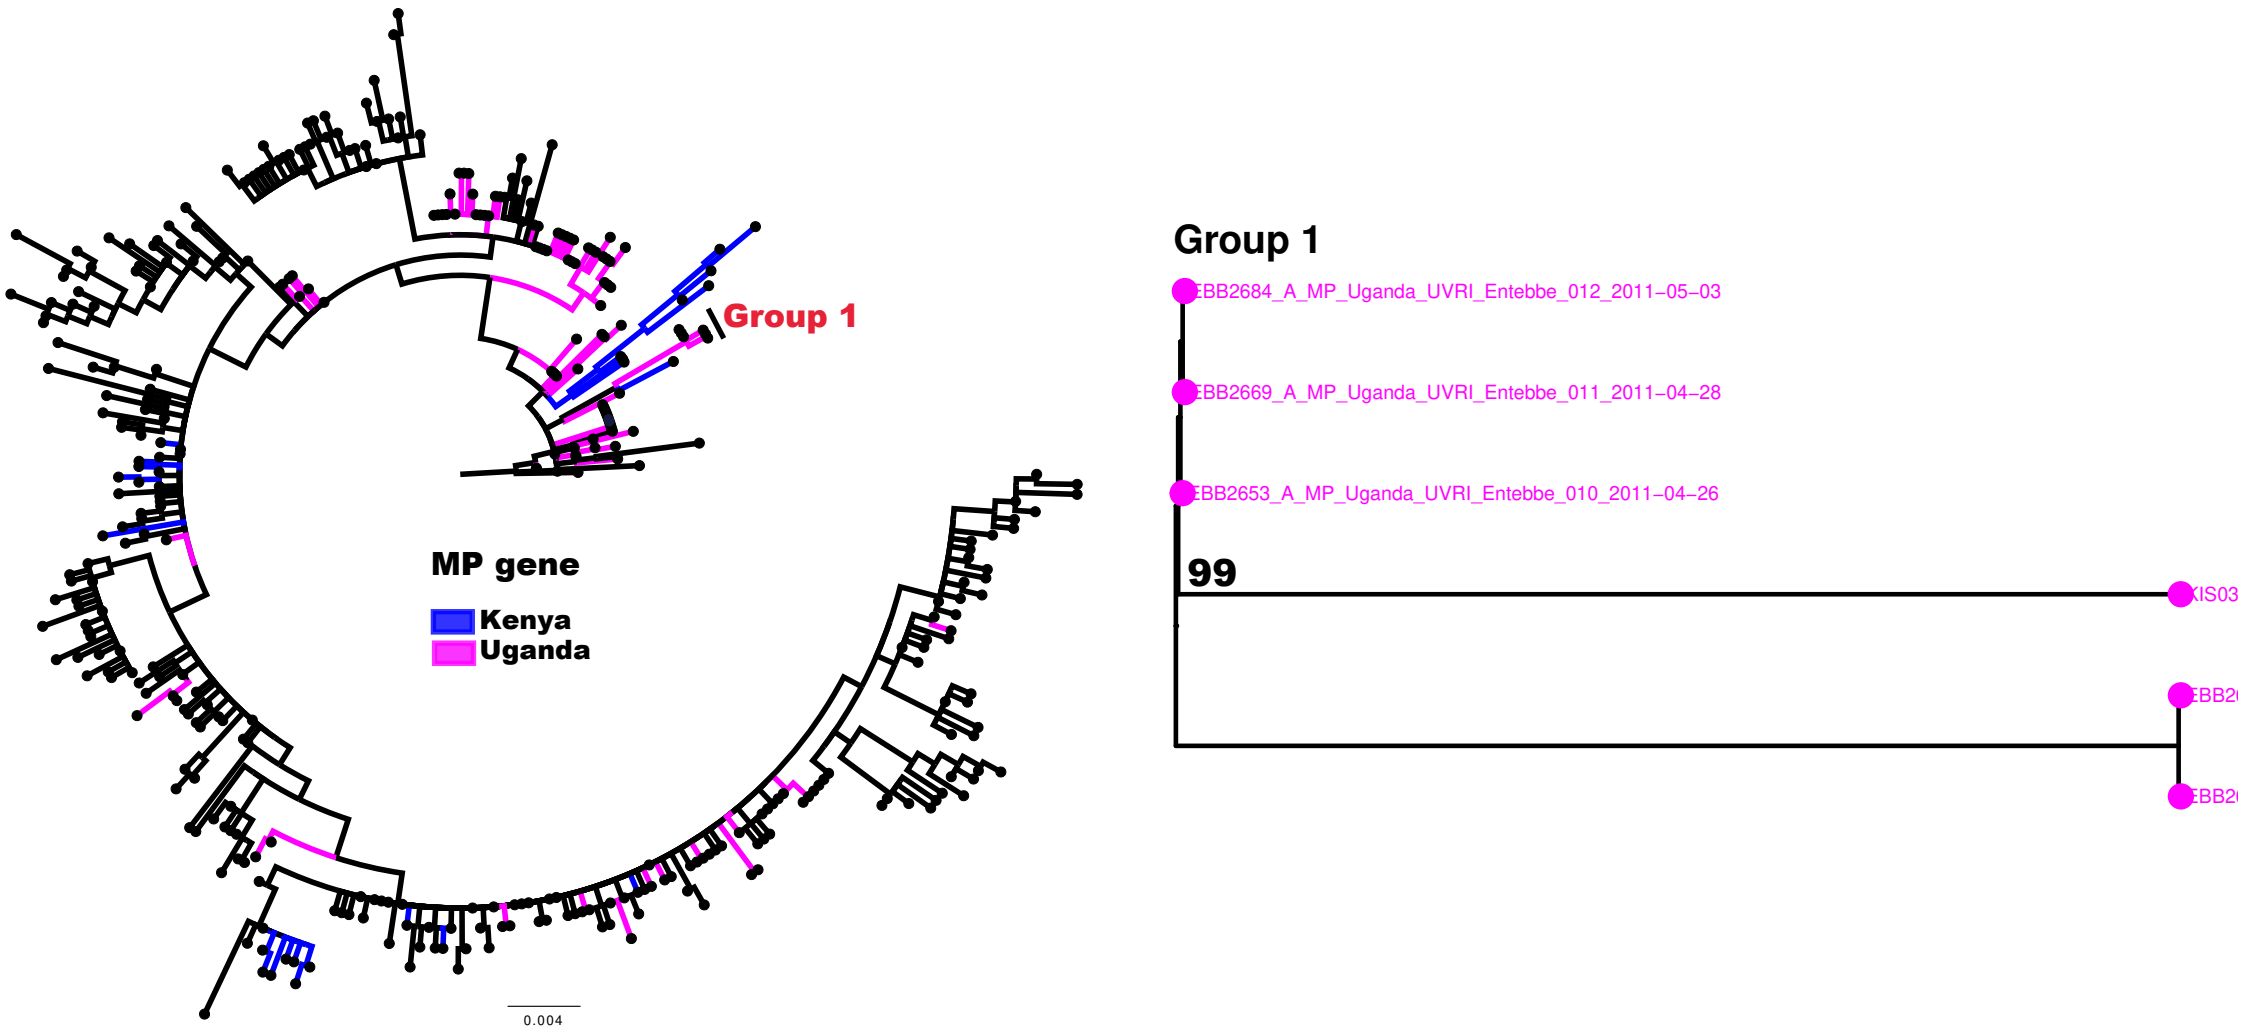

Supplementary Fig. 8: Phylogenetic clustering of 2009-2018 Uganda A(H1N1)pdm09 viruses with other African viruses (2009-2019) in the MP gene. Group details support are described in Supplementary Table 8 below.



**Supplementary Fig. 10: Phylogenetic clustering of Uganda and other Africa A(H3N2) viruses in the neuraminidase gene**

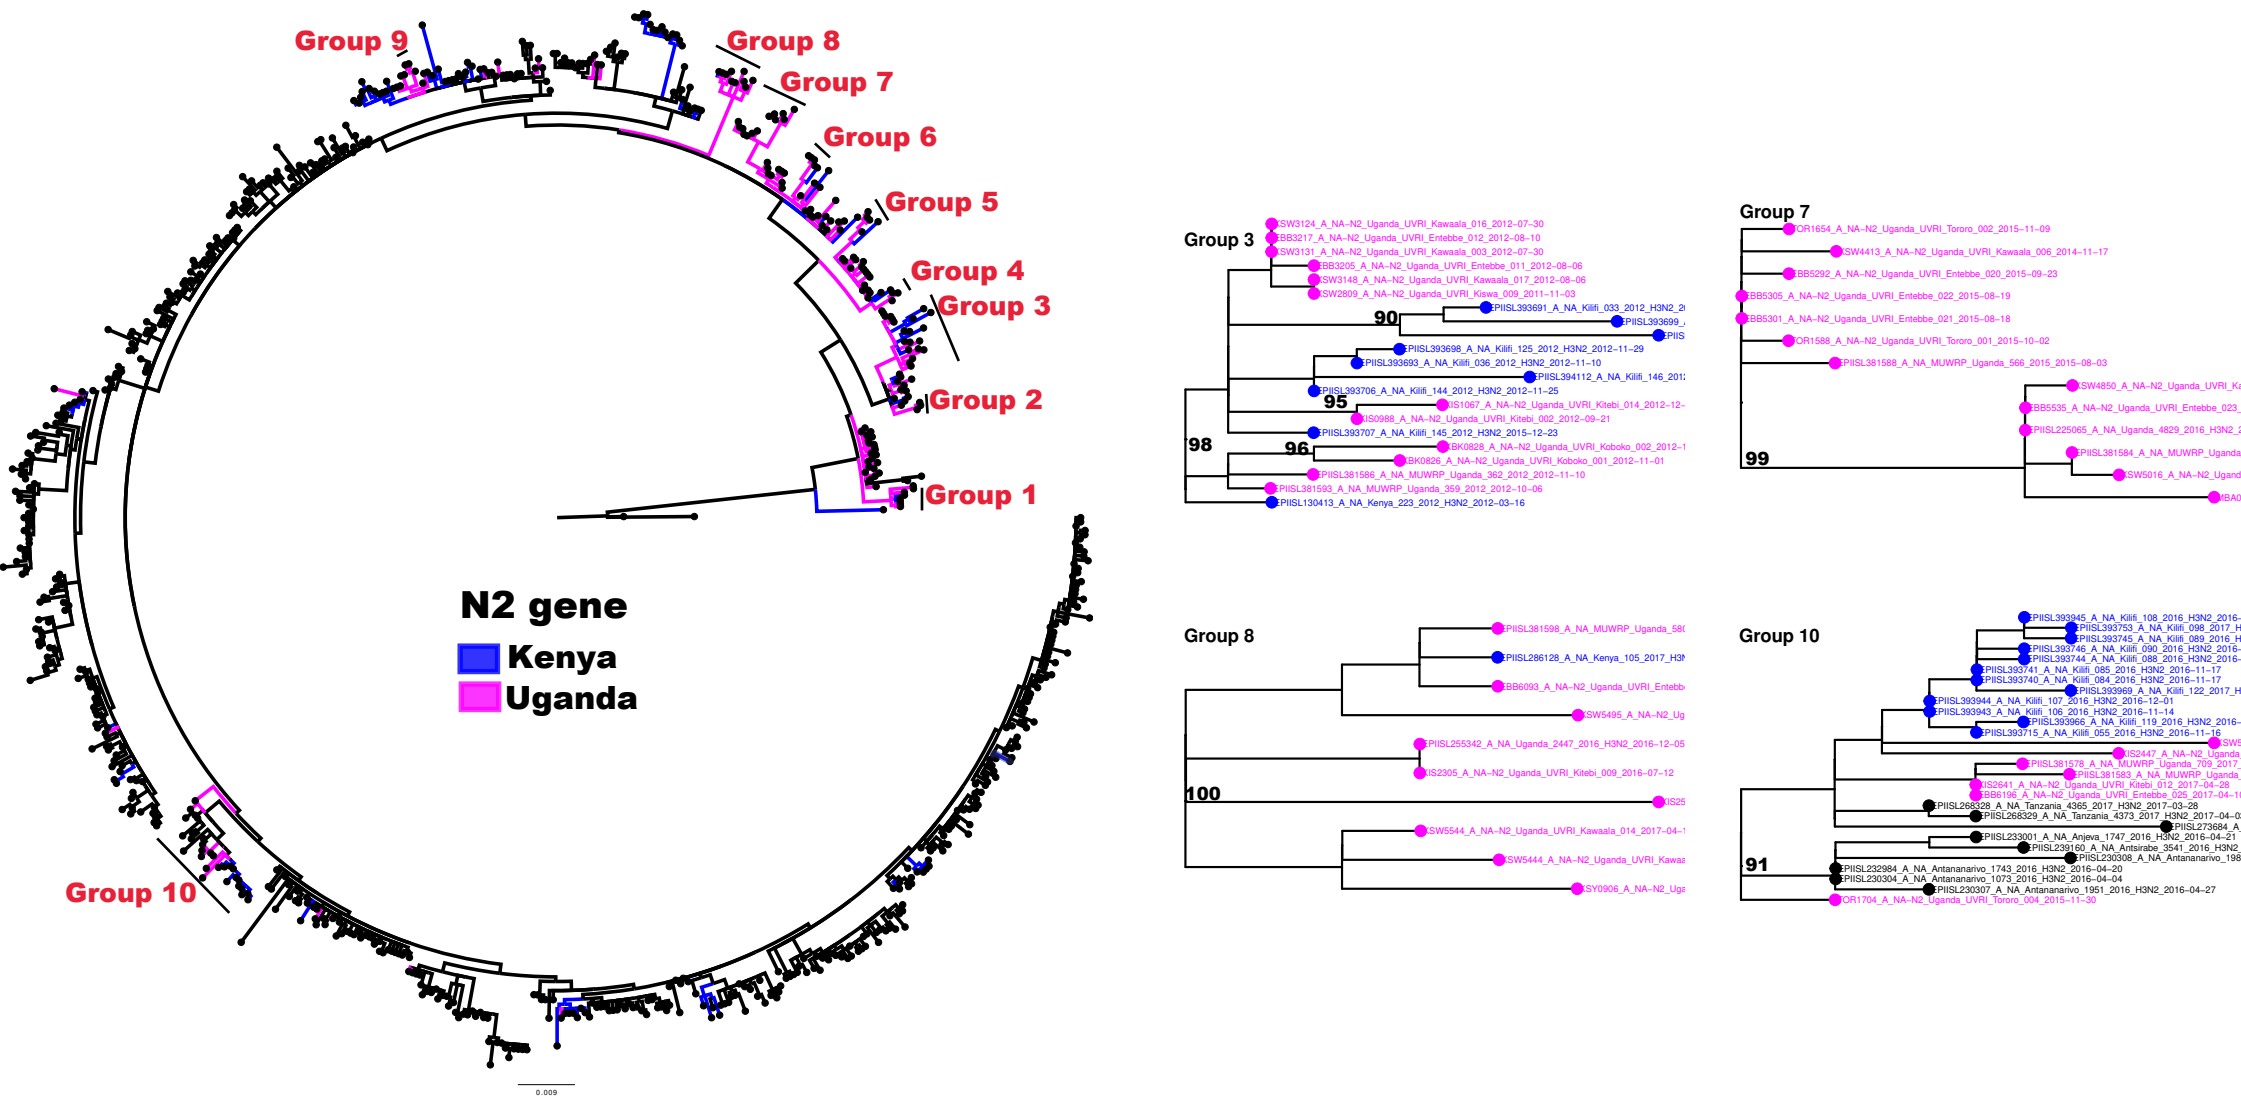

**Supplementary Fig. 10: Phylogenetic clustering of 2008-2017 Uganda A(H3N2) viruses with other African viruses (1994-2019) in the NA (N2) gene. Only the large groups (4/10) with 10 or more Uganda sequences are shown. Group details support are described in Supplementary Table 8 below.**

**Supplementary Fig. 11: Phylogenetic clustering of Uganda and other Africa A(H3N2) viruses in the matrix protein gene**

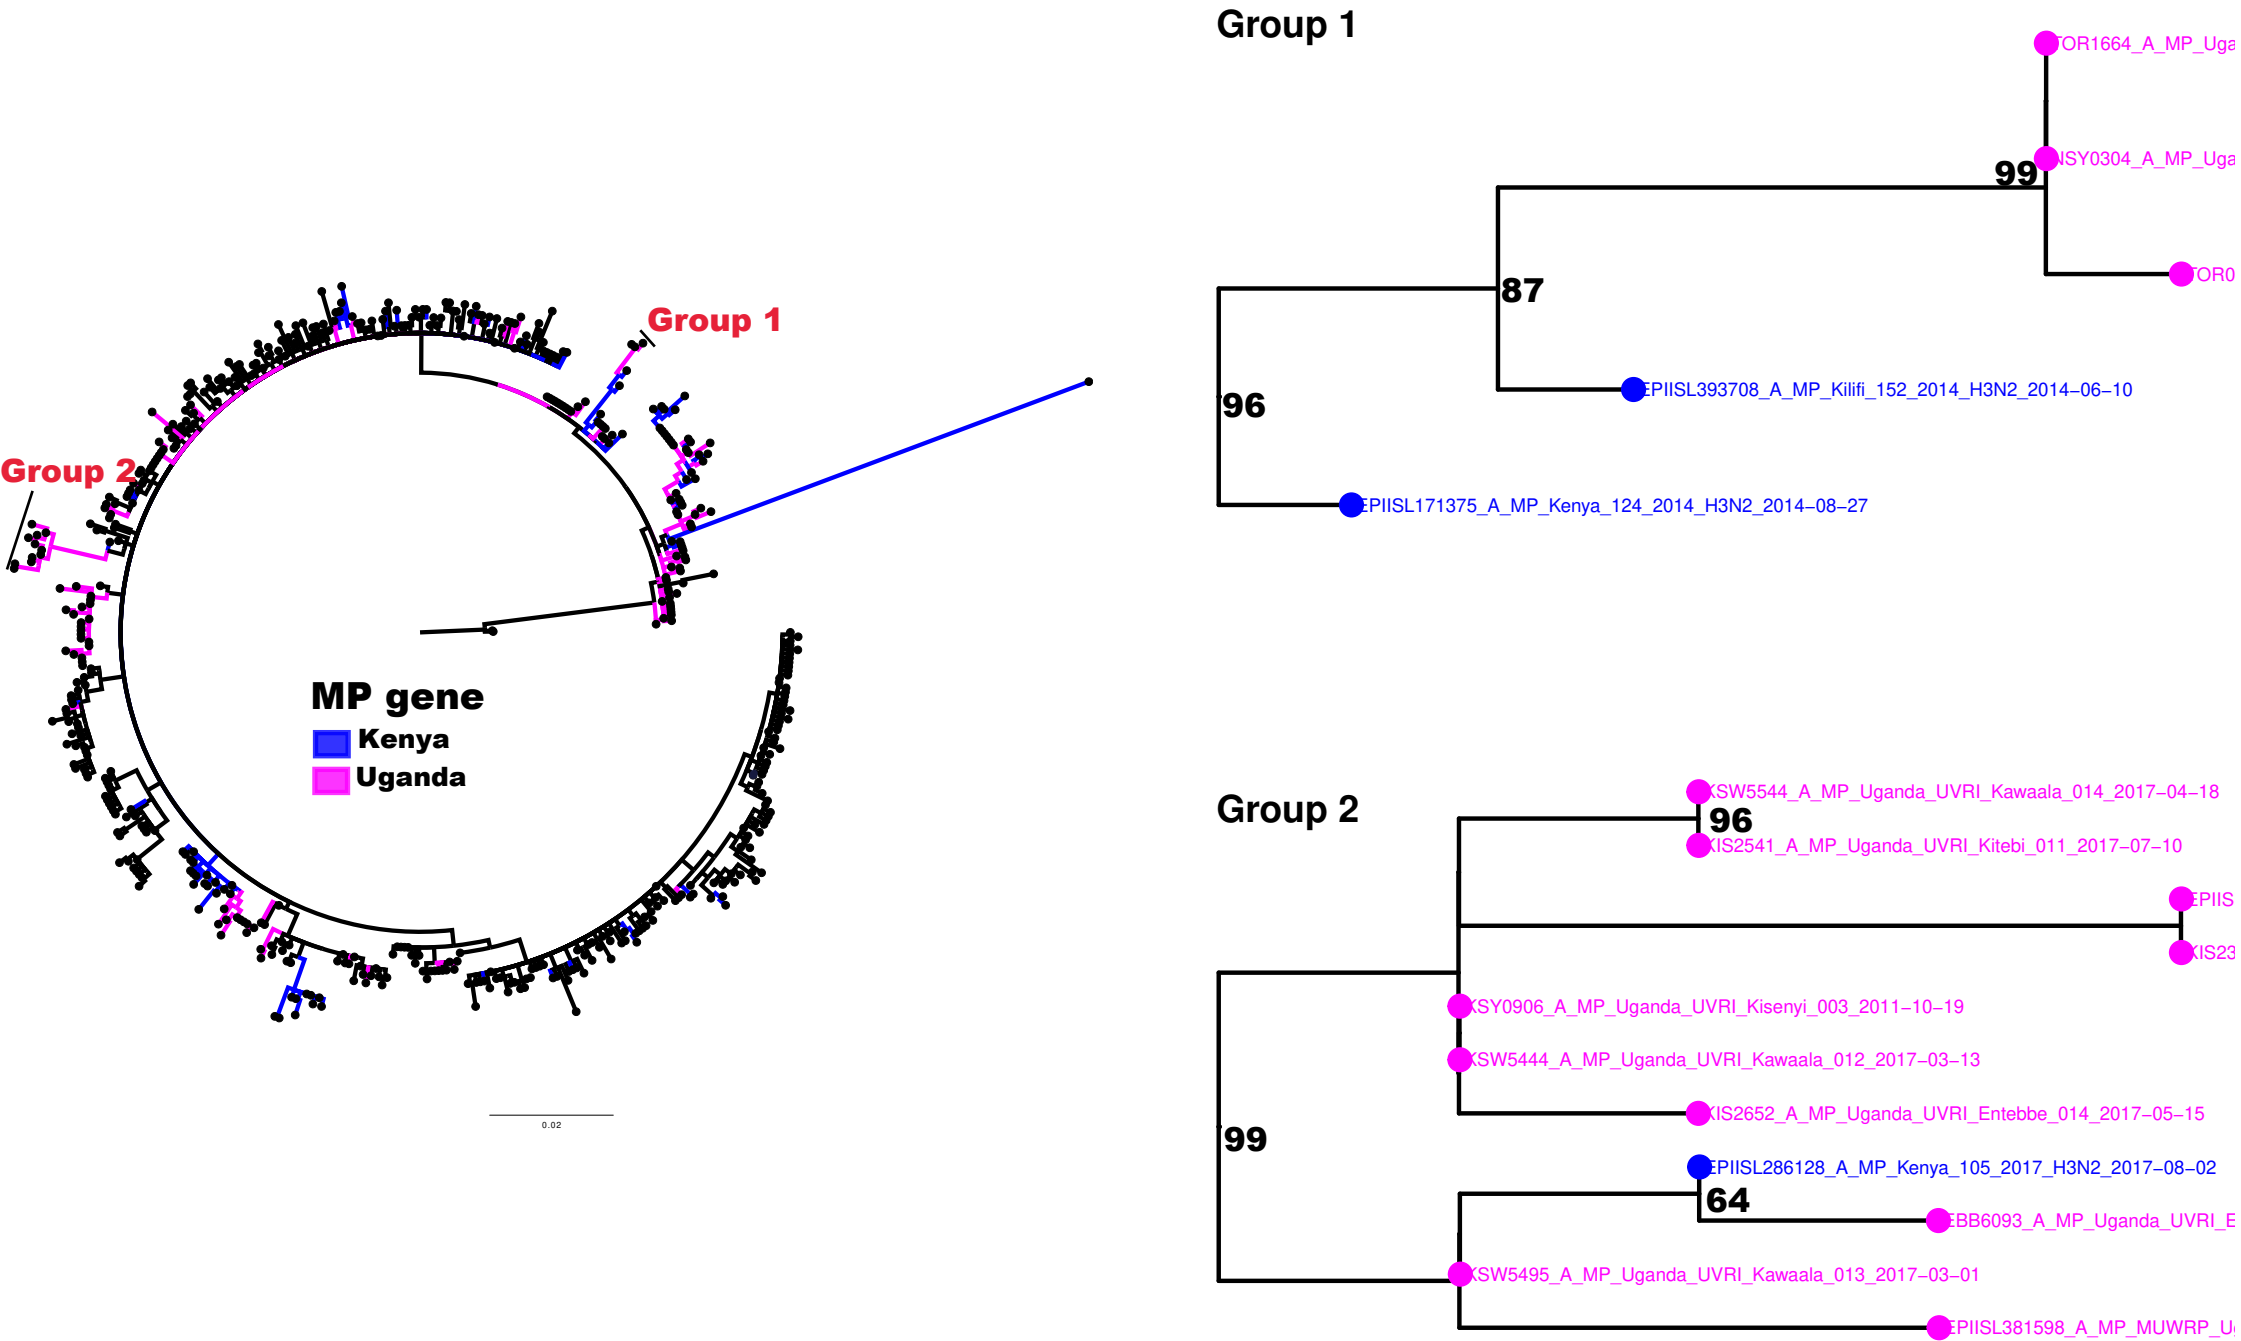

**Supplementary Fig. 11:** Phylogenetic clustering of 2008-2017 Uganda A(H3N2) viruses with other African viruses (1994-2019) in the MP gene. Only the large groups (9/15) with 5 or more Uganda sequences are displayed. Group details support are described in Supplementary Table 8 below.

**Supplementary Table 8: Details of highly supported phylogenetic groups among the newly-generated Uganda viruses and other African viruses**

| Group                        | Bootstrap | Number of Uganda viruses/ total number of viruses in the group | Origin of other viruses in the group              | Years group circulated | Clade to which group belongs |
|------------------------------|-----------|----------------------------------------------------------------|---------------------------------------------------|------------------------|------------------------------|
| <b>A(H1N1)pdm09</b>          |           |                                                                |                                                   |                        |                              |
| <b>A. Hemagglutinin (H1)</b> |           |                                                                |                                                   |                        |                              |
| 1                            | 100       | 4/5                                                            | Nairobi                                           | 2009 - 2011            | <b>H1-UG1</b>                |
| 2                            | 100       | 9/9                                                            | -                                                 | 2010 -2011             | <b>Clade 3</b>               |
| 3                            | 99        | 7/8                                                            | Kenya                                             | 2011                   | <b>Clade 5</b>               |
| 4                            | 99        | 4/4                                                            | -                                                 | 2011                   | <b>Clade 6</b>               |
| 5                            | 100       | 27/27                                                          | -                                                 | 2013 -2016             | <b>Clade 6A</b>              |
| 6                            | 99        | 3/6                                                            | Congo                                             | 2017                   | <b>6B.1</b>                  |
| <b>Neuraminidase (N1)</b>    |           |                                                                |                                                   |                        |                              |
| 1                            | 91        | 3/7                                                            | Tanzania, Kenya                                   | 2009 - 2011            |                              |
| 2                            | 100       | 9/9                                                            | -                                                 | 2010 - 2011            |                              |
| 3                            | 91        | 19/19                                                          | -                                                 | 2013 - 2015            |                              |
| 4                            | 95        | 16/16                                                          | -                                                 | 2015-2016              |                              |
| 5                            | 98        | 3/5                                                            | Congo                                             | 2017                   |                              |
| <b>Matrix protein (MP)</b>   |           |                                                                |                                                   |                        |                              |
| 1                            | 99        | 6/6                                                            | -                                                 | 2011                   |                              |
| <b>A(H3N2)</b>               |           |                                                                |                                                   |                        |                              |
| <b>B. Hemagglutinin (H3)</b> |           |                                                                |                                                   |                        |                              |
| 1                            | 92        | 3/3                                                            | -                                                 | 2009                   | <b>H3-UG1</b>                |
| 2                            | 95        | 3/3                                                            | -                                                 | 2010, 2017             | <b>7</b>                     |
| 3                            | 94        | 11/22                                                          | Kilifi, Kenya                                     | 2011 – 2012            | <b>7</b>                     |
| 4                            | 99        | 3/3                                                            | -                                                 | 2011                   | <b>3B</b>                    |
| 5                            | 91        | 22/ 22                                                         | -                                                 | 2014- 2016             | <b>3C.3</b>                  |
| 6                            | 97        | 3/5                                                            | Kilifi, Kenya                                     | 2013 - 2016            | <b>3C.3b</b>                 |
| 7                            | 100       | 9/10                                                           | Kenya                                             | 2011, 2016 - 2017      | <b>3C.3a</b>                 |
| 8                            | 96        | 4/11                                                           | Congo                                             | 2017 - 2018            | <b>3C.2a1a</b>               |
| <b>Neuraminidase (N2)</b>    |           |                                                                |                                                   |                        |                              |
| 1                            | 99        | 5/8                                                            | Kilifi                                            | 2008 - 2010            |                              |
| 2                            | 100       | 3/3                                                            | -                                                 | 2010, 2017             |                              |
| 3                            | 98        | 12/21                                                          | Kilifi                                            | 2011 - 2012            |                              |
| 4                            | 98        | 3/3                                                            | -                                                 | 2010 - 2011            |                              |
| 5                            | 94        | 3/5                                                            | Kilifi, Kenya                                     | 2013 - 2016            |                              |
| 6                            | 97        | 4/5                                                            | Kenya                                             | 2014                   |                              |
| 7                            | 99        | 13/13                                                          | -                                                 | 2012, 2014- 2016       |                              |
| 8                            | 100       | 9/10                                                           | Kenya                                             | 2011, 2016 - 2017      |                              |
| 9                            | 95        | 3/3                                                            | -                                                 | 2015 - 2017            |                              |
| 10                           | 91        | 7/28                                                           | Anjeva, Antsirabe, Antananarivo, Kilifi, Tanzania | 2015 - 2017            |                              |
| <b>Matrix protein (MP)</b>   |           |                                                                |                                                   |                        |                              |
| 1                            | 96        | 3/5                                                            | Kilifi, Kenya                                     | 2013 - 2016            |                              |
| 2                            | 99        | 10/11                                                          | Kenya                                             | 2016 - 2017            |                              |

**Supplementary Table 8: Highly supported phylogenetic groups (with bootstrap value  $\geq 90\%$  and at least 3 Uganda sequences) of Uganda A(H1N1)pdm09 and A(H3N2) viruses isolated in 2008-2018 [including (2008-2009) Makerere Walter Reed project (MWRP) and our new (2010-2018) dataset] with other African viruses (1994-2019) in the HA, NA, and MP genes. The number of Uganda viruses, country or city of origin for other African viruses, and years of viral sampling are reported for each group per gene. **Panel A** shows groups observed in the A(H1N1)pdm09 phylogenies. **Panel B** shows groups observed in the A(H3N2) phylogenies. The A(H3N2) group 1 consisted of the only MWRP viruses sampled in 2009. This table summarises information on the phylogenetic trees in Supplementary Fig. 6-11.**

## **Supplementary materials and methods**

### **Source of swabs and sampling**

Nasal and oropharyngeal swabs were collected from outpatients and inpatients with influenza-like illnesses (ILI) and severe acute respiratory illnesses (SARI) at the different sentinel sites, respectively, as described by Lutwama *et al.*<sup>3</sup>. The swabs were tested for influenza (A and B) and the IAV were further subtyped for seasonal [A(H1N1) and A(H3N2)] and pandemic A(H1N1)pdm09 influenza using the Centers for Disease Control's (CDC) real-time reverse-transcription polymerase chain reaction (rRT-PCR) protocols and primers (Atlanta, Georgia)<sup>4</sup>. All patient swabs were uniquely coded and frozen at  $-80^{\circ}\text{C}$ , and their sociodemographic data recorded using EpiInfo (CDC, Atlanta)<sup>3</sup>.

### **Viral RNA isolation and amplification**

Following isolation, the viral RNA was reverse transcribed into cDNA and the entire IAV genome amplified using the multi-segment real-time polymerase chain reaction (M-RT-PCR)<sup>5</sup> and universal IAV Uni/Inf primers in 25  $\mu\text{L}$  reactions containing 8  $\mu\text{L}$  nuclease-free water, 12.5  $\mu\text{L}$  2 $\times$  RT-PCR buffer, 0.2  $\mu\text{L}$  Uni12/Inf1 (10  $\mu\text{M}$ ), 0.3  $\mu\text{L}$  Uni12/Inf3 (10  $\mu\text{M}$ ), 0.5  $\mu\text{L}$  Uni13/Inf1 (10  $\mu\text{M}$ ), 0.5  $\mu\text{L}$  SuperScript III One-Step RT-PCR with Platinum *Taq* High Fidelity (Invitrogen) and 3  $\mu\text{L}$  extracted RNA. The M-RT-PCR standardised thermocycling conditions were as follows: 42  $^{\circ}\text{C}$  for 50 minutes, 50  $^{\circ}\text{C}$  for 10 minutes, 94  $^{\circ}\text{C}$  for 2 minutes; 4 cycles (94  $^{\circ}\text{C}$  for 30 seconds, 43  $^{\circ}\text{C}$  for 30 seconds and 68  $^{\circ}\text{C}$  for 3 minutes and 50 seconds) followed by 30 cycles of 94  $^{\circ}\text{C}$  for 30 seconds, 57  $^{\circ}\text{C}$  for 30 seconds and 68  $^{\circ}\text{C}$  for 3 minutes and 30 seconds (with the 3 minutes and 30 seconds for the 68  $^{\circ}\text{C}$  extension step increased by 10 seconds per subsequent cycle after cycle 1); and a final extension step at 68  $^{\circ}\text{C}$  for 10 minutes.



### **Next-generation sequencing**

Following PCR, the amplicons were purified using 1X AMPure XP beads (Beckman Coulter Inc., Brea, CA, USA), quantified with Quant-iT dsDNA High Sensitivity Assay (Invitrogen, Carlsbad, CA, USA), and normalized to 0.2 ng/μL. Indexed paired end libraries were then generated from 2.5 μL of 0.2 ng/μL amplicon pool using Nextera XT Sample Preparation Kit (Illumina, San Diego, CA, USA) following the manufacturer's protocol. Amplified libraries were purified using 0.8X AMPure XP beads, quantitated with Quant-iT dsDNA High Sensitivity Assay (Invitrogen, Carlsbad, CA, USA), and evaluated for fragment size in the Agilent 2100 BioAnalyzer System using the Agilent High Sensitivity DNA Kit (Agilent Technologies, Santa Clara, CA, USA). Libraries were then diluted to 2nM in preparation for pooling and denaturation for running on the Illumina MiSeq (Illumina, San Diego, CA, USA). Pooled libraries were sodium hydroxide denatured, diluted to 12.5 pM and sequenced on the Illumina MiSeq using 2 x 250 bp paired end reads with the MiSeq v2 500 cycle kit (Illumina, San Diego, CA, USA). Five percent Phi-X (Illumina, San Diego, CA, USA) spike-in was added to the libraries to increase library diversity by creating a more diverse set of library clusters. The MiSeq generated paired reads as fastq.gz files for each sample.

### **Sequence quality control**

Raw MiSeq reads were de-duplicated using FastUniq v1.1<sup>6</sup> and Trimmomatic v0.39<sup>7</sup> was used to trim off Nextera transposase, adaptors, and PCR primers from the unique reads, retaining only reads with  $\geq 80$  bps. Clean reads were used as input for the Iterative Refinement Meta-Assembler (IRMA) assembly<sup>8</sup>.

### **Genome assembly using Iterative Refinement Meta-Assembler (IRMA)**

The sequence reads were assembled using a reference-based pre-built module (FLU) implemented in the Iterative Refinement Meta-Assembler's (IRMA)<sup>8</sup>.

Due to the rapid evolution of influenza viruses, finding a single reference sequence with optimal coverage remains a challenge that IRMA tries to solve. IRMA uses a set of sequences or references which it iteratively refines to find an optimal consensus reference sequence for an optimal assembly. Specifically, IRMA's IAV reference set was built using publicly available genetic data (GenBank) for all 8 gene segments for all viral subtypes. Ineligible sequences i.e., duplicates, with more than 5 ambiguous bases, causing frame-shifts, and shorter than 60 % alignment length were excluded. Eligible sequences were aligned using MAFFT v7 to generate a consensus sequence set which IRMA uses as a default reference set for the FLU module.

We assembled the IAV genomes using the IRMA default settings as follows: median read quality score (Q-score) filter of 30; minimum read length of 125; frequency threshold for insertion and deletion refinement of 0.25 and 0.6, respectively; mismatch penalty of 5; and gap opening penalty of  $10^8$ . The IRMA output included: consensus sequences for all the eight gene segments, paired read counts, coverage depth, allele frequencies, and statistically supported variants for each sample.

### **Identification of amino acid substitutions and their biological relevance across the complete HA, NA, and MP proteins of Uganda IAVs using the influenza surveillance (FluSurver) webtool**

FluSurver is an influenza surveillance tool (<http://flusurver.bii.a-star.edu.sg>) used to identify and highlight phenotypically and epidemiologically important candidate amino acid substitutions among human influenza viruses for further investigation.

FluSurver compares the input viral protein sequences (multiple sequence alignment) to vaccine protein sequences and identify candidate amino acids, their biological relevance based on existing curated literature, their global frequency relative all sequences submitted in GenBank, and their binding activities (ligands binding, host-cell binding, antibody-binding,

and viral oligomerization interfaces) by visualizing resolved protein structures in the Protein Data Bank. FluSurver assigns a colour to each candidate substitution based on the significance of its biological function, reported as an “interestlevel”. Specifically, the most significant substitutions (interestlevel=3) are those that alter the viral virulence, cause strong drug resistance, or reverse the premature PB1-F2 stop codon of the A(H1N1)pdm09 subtype and are coloured **Red**. Substitutions at drug-binding sites or that alter host cell specificity have an interestlevel of 2 (significant) and are coloured **Orange**. Also, substitutions whose equivalent site is known to cause antigenic shifts and mild drug resistance are coloured **Orange** and assigned an interest level of 2 (significant). **Magenta** is assigned to significant substitutions that create or remove a glycosylation site with interestlevel=2. **Blue** substitutions are moderately significant (interestlevel=1) with structural functions at sites of interaction such as host cell receptor binding, binding small ligand(s), viral oligomerization interfaces, and antibody recognition sites. **Green** substitutions are common to a given subtype but their function and **Black** substitutions have no known biological function, and all are least significant (interestlevel=0).

In this study, we aligned complete protein sequences for the newly-generated HA, NA, and MP per subtype using MUSCLE<sup>9</sup> and compared them to the reference vaccine virus sequences in the FluSurver webtool (<http://flusurver.bii.a-star.edu.sg>; accessed on 24<sup>th</sup> September 2021) to identify amino acid substitutions and their respective predicted biological functions.

**Supplementary Fig. 12: Geographical distribution of sampled sentinel sites in the general UVRI-NIC influenza surveillance programme**

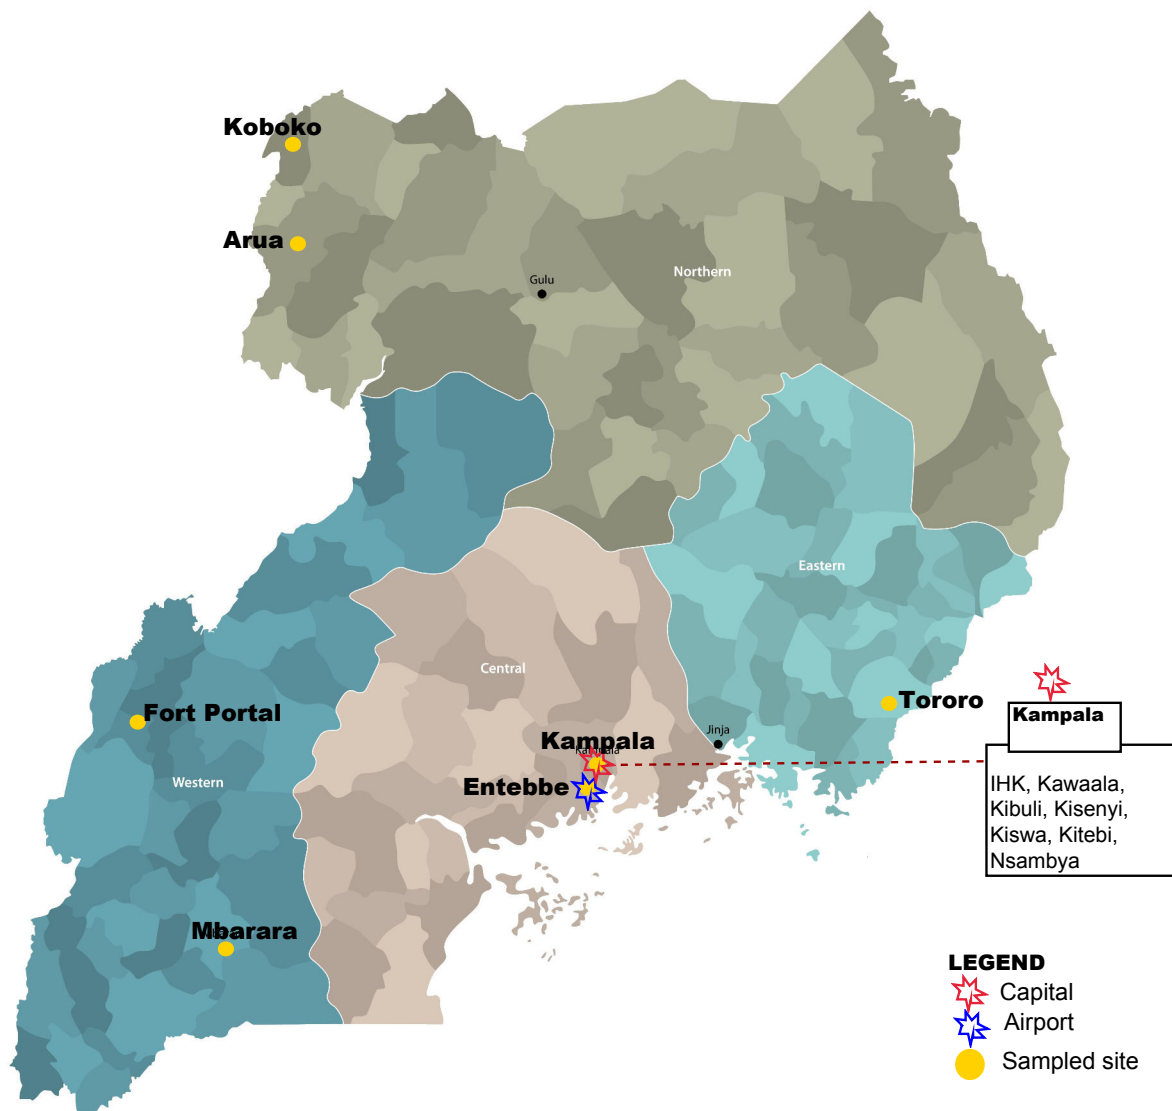

**Supplementary Fig. 12: Geographical distribution of sampled sentinel sites in the UVRI-NIC influenza surveillance programme.** District hospitals included Arua-ARU, Entebbe-EBB, Fort Portal-FTL, Koboko-KBK, Mbarara-MBA, Tororo-TOR, and Kampala. Kampala had three hospitals: International Hospital Kampala-IHK (International Hospital Kampala), Kibuli moslem hospital-KIB, Nsambya Hospital-NSY, and four clinics: Kawaala Health Center-KIS, Kiswa Health Center-KSW, Kisenyi Health Center-KSY, and Kitebi health centre-KIS samples. Swabs were assigned unique laboratory identification number using the site codes and a number. For example, EBB0001 for swab 0001 from Entebbe. The map template was purchased from <https://www.alamy.com>.



|                                                                                                                                                                                                                                                                                                                                                                                                                                                                                                                                                                                                                                                                                                                                                                                                                                                                                                                                                                                                                                                                                                                                                                                                                                                                                                                                                                                                                                                                                                                                                                                                                                                                                                                                                                                                                                                                                                                                                                                                                                                                                                                                                                                                                                                                                                                                                                                                                                                                                                                                                                                                                                                                                                                                                                                                                                                                                                                                                                                                                                                                                                                                                                                                                                                                                                                                                                                                                                                                                                                                                                                                                                                   |                                                                                                                                                                                                                                                                                                                                                                                                                                                                                                                                                                                                                                                                                                                                                                                                                                                                                                                                                                                                                                                                                                                                                                                                                                                                                                                                                                                                                                                                                                                                                                                                                                                                                                                                                                                                                                                                                                                                                                                                                                                                                                                                                                                                                                                                                                                                                                                                                                                                                                                                                                                                                                                                                                                                                                                                                                                                                                                                                                                                                                                                                                                                                                                                                                                                                                                                                                                                                                                                                                                                                                                                                                                                                                                                                                                                                                                                                                                                                                                                                                                                                                                                                                                                                                                                                                                                                                                                                                                                                                                                                                                                                                                                                                                                                                                                                                                                                                                                                                                                                                                                                                                                                                                                                                                                                                                                                                                                                                                                                                                                                                                                                                                                                                                                                             |
|---------------------------------------------------------------------------------------------------------------------------------------------------------------------------------------------------------------------------------------------------------------------------------------------------------------------------------------------------------------------------------------------------------------------------------------------------------------------------------------------------------------------------------------------------------------------------------------------------------------------------------------------------------------------------------------------------------------------------------------------------------------------------------------------------------------------------------------------------------------------------------------------------------------------------------------------------------------------------------------------------------------------------------------------------------------------------------------------------------------------------------------------------------------------------------------------------------------------------------------------------------------------------------------------------------------------------------------------------------------------------------------------------------------------------------------------------------------------------------------------------------------------------------------------------------------------------------------------------------------------------------------------------------------------------------------------------------------------------------------------------------------------------------------------------------------------------------------------------------------------------------------------------------------------------------------------------------------------------------------------------------------------------------------------------------------------------------------------------------------------------------------------------------------------------------------------------------------------------------------------------------------------------------------------------------------------------------------------------------------------------------------------------------------------------------------------------------------------------------------------------------------------------------------------------------------------------------------------------------------------------------------------------------------------------------------------------------------------------------------------------------------------------------------------------------------------------------------------------------------------------------------------------------------------------------------------------------------------------------------------------------------------------------------------------------------------------------------------------------------------------------------------------------------------------------------------------------------------------------------------------------------------------------------------------------------------------------------------------------------------------------------------------------------------------------------------------------------------------------------------------------------------------------------------------------------------------------------------------------------------------------------------------|-------------------------------------------------------------------------------------------------------------------------------------------------------------------------------------------------------------------------------------------------------------------------------------------------------------------------------------------------------------------------------------------------------------------------------------------------------------------------------------------------------------------------------------------------------------------------------------------------------------------------------------------------------------------------------------------------------------------------------------------------------------------------------------------------------------------------------------------------------------------------------------------------------------------------------------------------------------------------------------------------------------------------------------------------------------------------------------------------------------------------------------------------------------------------------------------------------------------------------------------------------------------------------------------------------------------------------------------------------------------------------------------------------------------------------------------------------------------------------------------------------------------------------------------------------------------------------------------------------------------------------------------------------------------------------------------------------------------------------------------------------------------------------------------------------------------------------------------------------------------------------------------------------------------------------------------------------------------------------------------------------------------------------------------------------------------------------------------------------------------------------------------------------------------------------------------------------------------------------------------------------------------------------------------------------------------------------------------------------------------------------------------------------------------------------------------------------------------------------------------------------------------------------------------------------------------------------------------------------------------------------------------------------------------------------------------------------------------------------------------------------------------------------------------------------------------------------------------------------------------------------------------------------------------------------------------------------------------------------------------------------------------------------------------------------------------------------------------------------------------------------------------------------------------------------------------------------------------------------------------------------------------------------------------------------------------------------------------------------------------------------------------------------------------------------------------------------------------------------------------------------------------------------------------------------------------------------------------------------------------------------------------------------------------------------------------------------------------------------------------------------------------------------------------------------------------------------------------------------------------------------------------------------------------------------------------------------------------------------------------------------------------------------------------------------------------------------------------------------------------------------------------------------------------------------------------------------------------------------------------------------------------------------------------------------------------------------------------------------------------------------------------------------------------------------------------------------------------------------------------------------------------------------------------------------------------------------------------------------------------------------------------------------------------------------------------------------------------------------------------------------------------------------------------------------------------------------------------------------------------------------------------------------------------------------------------------------------------------------------------------------------------------------------------------------------------------------------------------------------------------------------------------------------------------------------------------------------------------------------------------------------------------------------------------------------------------------------------------------------------------------------------------------------------------------------------------------------------------------------------------------------------------------------------------------------------------------------------------------------------------------------------------------------------------------------------------------------------------------------------------------------|
| <p>"EPIISL298519" "EPIISL298520" "EPIISL298522" "EPIISL298524" "EPIISL298525" "EPIISL298526"<br/> "EPIISL298528" "EPIISL298529" "EPIISL299835" "EPIISL299837" "EPIISL299838" "EPIISL299845"<br/> "EPIISL299846" "EPIISL299849" "EPIISL299850" "EPIISL299851" "EPIISL300845" "EPIISL300849"<br/> "EPIISL300851" "EPIISL300852" "EPIISL300853" "EPIISL300854" "EPIISL300855" "EPIISL300857"<br/> "EPIISL300859" "EPIISL300885" "EPIISL300901" "EPIISL300903" "EPIISL300909" "EPIISL300913"<br/> "EPIISL300916" "EPIISL305251" "EPIISL305252" "EPIISL305253" "EPIISL305254" "EPIISL305265"<br/> "EPIISL305266" "EPIISL305267" "EPIISL305269" "EPIISL305270" "EPIISL305271" "EPIISL305275"<br/> "EPIISL305277" "EPIISL305912" "EPIISL309495" "EPIISL309496" "EPIISL309497" "EPIISL309498"<br/> "EPIISL312940" "EPIISL312953" "EPIISL312956" "EPIISL313594" "EPIISL313595" "EPIISL313596"<br/> "EPIISL313597" "EPIISL316454" "EPIISL319781" "EPIISL319782" "EPIISL319783" "EPIISL319784"<br/> "EPIISL319785" "EPIISL319786" "EPIISL319787" "EPIISL319788" "EPIISL319789" "EPIISL319792"<br/> "EPIISL319793" "EPIISL319794" "EPIISL319795" "EPIISL319796" "EPIISL319799" "EPIISL319800"<br/> "EPIISL319801" "EPIISL319802" "EPIISL319803" "EPIISL319828" "EPIISL319829" "EPIISL319830"<br/> "EPIISL319831" "EPIISL319832" "EPIISL319833" "EPIISL319834" "EPIISL319835" "EPIISL319836"<br/> "EPIISL319837" "EPIISL319839" "EPIISL320256" "EPIISL320257" "EPIISL320258" "EPIISL320259"<br/> "EPIISL320260" "EPIISL320693" "EPIISL320710" "EPIISL320713" "EPIISL321969" "EPIISL322857"<br/> "EPIISL322858" "EPIISL322860" "EPIISL322861" "EPIISL322862" "EPIISL322863" "EPIISL322867"<br/> "EPIISL330360" "EPIISL330361" "EPIISL330362" "EPIISL330364" "EPIISL330366" "EPIISL330367"<br/> "EPIISL330368" "EPIISL330370" "EPIISL330371" "EPIISL330372" "EPIISL330374" "EPIISL330375"<br/> "EPIISL330377" "EPIISL330380" "EPIISL330381" "EPIISL330382" "EPIISL330383" "EPIISL330384"<br/> "EPIISL330385" "EPIISL330386" "EPIISL330388" "EPIISL330389" "EPIISL330390" "EPIISL330391"<br/> "EPIISL330392" "EPIISL330393" "EPIISL330394" "EPIISL330397" "EPIISL330823" "EPIISL330824"<br/> "EPIISL330825" "EPIISL330830" "EPIISL330836" "EPIISL330842" "EPIISL330843" "EPIISL330844"<br/> "EPIISL330847" "EPIISL330850" "EPIISL330851" "EPIISL330852" "EPIISL330853" "EPIISL330854"<br/> "EPIISL330856" "EPIISL330857" "EPIISL330858" "EPIISL330861" "EPIISL330864" "EPIISL331563"<br/> "EPIISL331564" "EPIISL331565" "EPIISL331566" "EPIISL331946" "EPIISL331951" "EPIISL331952"<br/> "EPIISL331956" "EPIISL332315" "EPIISL332397" "EPIISL332398" "EPIISL33576" "EPIISL335852"<br/> "EPIISL335854" "EPIISL335855" "EPIISL335858" "EPIISL335878" "EPIISL335879" "EPIISL335880"<br/> "EPIISL335883" "EPIISL335884" "EPIISL335911" "EPIISL335951" "EPIISL335952" "EPIISL335954"<br/> "EPIISL335955" "EPIISL336635" "EPIISL336636" "EPIISL336637" "EPIISL336638" "EPIISL336639"<br/> "EPIISL338706" "EPIISL34539" "EPIISL349812" "EPIISL349814" "EPIISL35013" "EPIISL35021"<br/> "EPIISL35022" "EPIISL351839" "EPIISL351842" "EPIISL351843" "EPIISL351848" "EPIISL351849"<br/> "EPIISL351874" "EPIISL353332" "EPIISL353346" "EPIISL353439" "EPIISL355491" "EPIISL355508"<br/> "EPIISL355524" "EPIISL355529" "EPIISL362255" "EPIISL362257" "EPIISL362284" "EPIISL364140"<br/> "EPIISL364141" "EPIISL364156" "EPIISL364554" "EPIISL377817" "EPIISL377818" "EPIISL390404"<br/> "EPIISL409210" "EPIISL409510" "EPIISL409511" "EPIISL409717" "EPIISL409736" "EPIISL409764"<br/> "EPIISL62231" "EPIISL62338" "EPIISL71367" "EPIISL78853" "EPIISL78854" "EPIISL78855"</p> | <p>"EPIISL338623" "EPIISL342243" "EPIISL346055" "EPIISL346056" "EPIISL346057" "EPIISL346059" "EPIISL346220" "EPIISL346222"<br/> "EPIISL347934" "EPIISL347940" "EPIISL347941" "EPIISL347944" "EPIISL347947" "EPIISL347950" "EPIISL347951" "EPIISL347952"<br/> "EPIISL348141" "EPIISL348142" "EPIISL348146" "EPIISL348160" "EPIISL350071" "EPIISL350077" "EPIISL350078" "EPIISL350085"<br/> "EPIISL353449" "EPIISL353513" "EPIISL353514" "EPIISL353543" "EPIISL355535" "EPIISL355536" "EPIISL355540" "EPIISL355541"<br/> "EPIISL355602" "EPIISL355604" "EPIISL355607" "EPIISL355634" "EPIISL355637" "EPIISL355672" "EPIISL356223" "EPIISL356224"<br/> "EPIISL356225" "EPIISL356292" "EPIISL356293" "EPIISL356294" "EPIISL356295" "EPIISL356296" "EPIISL356297" "EPIISL356299"<br/> "EPIISL356300" "EPIISL356303" "EPIISL356309" "EPIISL356311" "EPIISL356312" "EPIISL362170" "EPIISL362172" "EPIISL362173"<br/> "EPIISL362175" "EPIISL362177" "EPIISL362178" "EPIISL362179" "EPIISL362180" "EPIISL362181" "EPIISL362182" "EPIISL362188"<br/> "EPIISL362213" "EPIISL362214" "EPIISL362217" "EPIISL362220" "EPIISL362221" "EPIISL362222" "EPIISL362224" "EPIISL362245"<br/> "EPIISL362246" "EPIISL362250" "EPIISL362252" "EPIISL362254" "EPIISL362341" "EPIISL362389" "EPIISL362390" "EPIISL362391"<br/> "EPIISL362393" "EPIISL362394" "EPIISL362396" "EPIISL363855" "EPIISL363867" "EPIISL363869" "EPIISL363870" "EPIISL363871"<br/> "EPIISL363873" "EPIISL363875" "EPIISL363876" "EPIISL363877" "EPIISL363878" "EPIISL363880" "EPIISL363881" "EPIISL363884"<br/> "EPIISL363888" "EPIISL363892" "EPIISL363893" "EPIISL363895" "EPIISL363896" "EPIISL363897" "EPIISL363898" "EPIISL363899"<br/> "EPIISL363900" "EPIISL363901" "EPIISL363902" "EPIISL363904" "EPIISL363905" "EPIISL363906" "EPIISL363907" "EPIISL363957"<br/> "EPIISL363958" "EPIISL363962" "EPIISL363963" "EPIISL363968" "EPIISL363969" "EPIISL363970" "EPIISL363975" "EPIISL363976"<br/> "EPIISL364000" "EPIISL364001" "EPIISL364002" "EPIISL364003" "EPIISL364005" "EPIISL364010" "EPIISL364011" "EPIISL364540"<br/> "EPIISL364541" "EPIISL365767" "EPIISL365768" "EPIISL365769" "EPIISL365770" "EPIISL365771" "EPIISL365772" "EPIISL365773"<br/> "EPIISL365774" "EPIISL365775" "EPIISL365776" "EPIISL365778" "EPIISL365780" "EPIISL365781" "EPIISL365782" "EPIISL365783"<br/> "EPIISL365784" "EPIISL365785" "EPIISL365790" "EPIISL365834" "EPIISL365837" "EPIISL365974" "EPIISL366006" "EPIISL368194"<br/> "EPIISL368204" "EPIISL368206" "EPIISL377899" "EPIISL377900" "EPIISL377901" "EPIISL377902" "EPIISL377904" "EPIISL381578"<br/> "EPIISL381580" "EPIISL381582" "EPIISL381583" "EPIISL381584" "EPIISL381586" "EPIISL381588" "EPIISL381590" "EPIISL381592"<br/> "EPIISL381593" "EPIISL381598" "EPIISL381599" "EPIISL390122" "EPIISL390125" "EPIISL392520" "EPIISL392521" "EPIISL392523"<br/> "EPIISL392524" "EPIISL392526" "EPIISL393567" "EPIISL393571" "EPIISL393572" "EPIISL393574" "EPIISL393575" "EPIISL393576"<br/> "EPIISL393579" "EPIISL393581" "EPIISL393582" "EPIISL393583" "EPIISL393584" "EPIISL393588" "EPIISL393595" "EPIISL393596"<br/> "EPIISL393682" "EPIISL393684" "EPIISL393685" "EPIISL393686" "EPIISL393687" "EPIISL393688" "EPIISL393689" "EPIISL393690"<br/> "EPIISL393691" "EPIISL393692" "EPIISL393693" "EPIISL393694" "EPIISL393695" "EPIISL393696" "EPIISL393697" "EPIISL393698"<br/> "EPIISL393699" "EPIISL393700" "EPIISL393701" "EPIISL393702" "EPIISL393703" "EPIISL393705" "EPIISL393706" "EPIISL393707"<br/> "EPIISL393708" "EPIISL393709" "EPIISL393711" "EPIISL393712" "EPIISL393713" "EPIISL393714" "EPIISL393715" "EPIISL393717"<br/> "EPIISL393718" "EPIISL393719" "EPIISL393721" "EPIISL393723" "EPIISL393725" "EPIISL393726" "EPIISL393729" "EPIISL393730"<br/> "EPIISL393732" "EPIISL393733" "EPIISL393734" "EPIISL393736" "EPIISL393737" "EPIISL393738" "EPIISL393740" "EPIISL393742"<br/> "EPIISL393745" "EPIISL393748" "EPIISL393751" "EPIISL393757" "EPIISL393758" "EPIISL393759" "EPIISL393781" "EPIISL393782"<br/> "EPIISL393937" "EPIISL393938" "EPIISL393940" "EPIISL393941" "EPIISL393946" "EPIISL393955" "EPIISL393956" "EPIISL393960"<br/> "EPIISL393963" "EPIISL393967" "EPIISL394051" "EPIISL394052" "EPIISL394106" "EPIISL394107" "EPIISL394108" "EPIISL394110"<br/> "EPIISL394111" "EPIISL394112" "EPIISL394923" "EPIISL394924" "EPIISL394948" "EPIISL394949" "EPIISL394950" "EPIISL397182"<br/> "EPIISL397199" "EPIISL398311" "EPIISL398313" "EPIISL398314" "EPIISL398315" "EPIISL398532" "EPIISL398534" "EPIISL398535"<br/> "EPIISL398555" "EPIISL398790" "EPIISL398795" "EPIISL400779" "EPIISL400781" "EPIISL400782" "EPIISL400789" "EPIISL400792"<br/> "EPIISL400887" "EPIISL402407" "EPIISL402502" "EPIISL402504" "EPIISL402506" "EPIISL402508" "EPIISL402765" "EPIISL402766"<br/> "EPIISL402768" "EPIISL402769" "EPIISL402771" "EPIISL402772" "EPIISL402773" "EPIISL402774" "EPIISL402776" "EPIISL402779"<br/> "EPIISL402780" "EPIISL409343" "EPIISL409346" "EPIISL409350" "EPIISL409353" "EPIISL409356" "EPIISL409357" "EPIISL409358"<br/> "EPIISL409359" "EPIISL409361" "EPIISL409407" "EPIISL409410" "EPIISL409411" "EPIISL409412" "EPIISL409413" "EPIISL409414"<br/> "EPIISL409437" "EPIISL77944" "EPIISL84053" "EPIISL89055" "EPIISL89056" "EPIISL89058" "EPIISL89059" "EPIISL89060"<br/> "EPIISL89061" "EPIISL89063" "EPIISL89064" "EPIISL89065" "EPIISL89068" "EPIISL89069" "EPIISL89074" "EPIISL89077"<br/> "EPIISL89078" "EPIISL89079" "EPIISL89081" "EPIISL89082" "EPIISL89084" "EPIISL89085" "EPIISL89086" "EPIISL89090"<br/> "EPIISL89091" "EPIISL89092" "EPIISL89093" "EPIISL89097" "EPIISL89098" "EPIISL89100" "EPIISL89103" "EPIISL89105"<br/> "EPIISL89107" "EPIISL89111" "EPIISL89112" "EPIISL93638"</p> |
|---------------------------------------------------------------------------------------------------------------------------------------------------------------------------------------------------------------------------------------------------------------------------------------------------------------------------------------------------------------------------------------------------------------------------------------------------------------------------------------------------------------------------------------------------------------------------------------------------------------------------------------------------------------------------------------------------------------------------------------------------------------------------------------------------------------------------------------------------------------------------------------------------------------------------------------------------------------------------------------------------------------------------------------------------------------------------------------------------------------------------------------------------------------------------------------------------------------------------------------------------------------------------------------------------------------------------------------------------------------------------------------------------------------------------------------------------------------------------------------------------------------------------------------------------------------------------------------------------------------------------------------------------------------------------------------------------------------------------------------------------------------------------------------------------------------------------------------------------------------------------------------------------------------------------------------------------------------------------------------------------------------------------------------------------------------------------------------------------------------------------------------------------------------------------------------------------------------------------------------------------------------------------------------------------------------------------------------------------------------------------------------------------------------------------------------------------------------------------------------------------------------------------------------------------------------------------------------------------------------------------------------------------------------------------------------------------------------------------------------------------------------------------------------------------------------------------------------------------------------------------------------------------------------------------------------------------------------------------------------------------------------------------------------------------------------------------------------------------------------------------------------------------------------------------------------------------------------------------------------------------------------------------------------------------------------------------------------------------------------------------------------------------------------------------------------------------------------------------------------------------------------------------------------------------------------------------------------------------------------------------------------------------|-------------------------------------------------------------------------------------------------------------------------------------------------------------------------------------------------------------------------------------------------------------------------------------------------------------------------------------------------------------------------------------------------------------------------------------------------------------------------------------------------------------------------------------------------------------------------------------------------------------------------------------------------------------------------------------------------------------------------------------------------------------------------------------------------------------------------------------------------------------------------------------------------------------------------------------------------------------------------------------------------------------------------------------------------------------------------------------------------------------------------------------------------------------------------------------------------------------------------------------------------------------------------------------------------------------------------------------------------------------------------------------------------------------------------------------------------------------------------------------------------------------------------------------------------------------------------------------------------------------------------------------------------------------------------------------------------------------------------------------------------------------------------------------------------------------------------------------------------------------------------------------------------------------------------------------------------------------------------------------------------------------------------------------------------------------------------------------------------------------------------------------------------------------------------------------------------------------------------------------------------------------------------------------------------------------------------------------------------------------------------------------------------------------------------------------------------------------------------------------------------------------------------------------------------------------------------------------------------------------------------------------------------------------------------------------------------------------------------------------------------------------------------------------------------------------------------------------------------------------------------------------------------------------------------------------------------------------------------------------------------------------------------------------------------------------------------------------------------------------------------------------------------------------------------------------------------------------------------------------------------------------------------------------------------------------------------------------------------------------------------------------------------------------------------------------------------------------------------------------------------------------------------------------------------------------------------------------------------------------------------------------------------------------------------------------------------------------------------------------------------------------------------------------------------------------------------------------------------------------------------------------------------------------------------------------------------------------------------------------------------------------------------------------------------------------------------------------------------------------------------------------------------------------------------------------------------------------------------------------------------------------------------------------------------------------------------------------------------------------------------------------------------------------------------------------------------------------------------------------------------------------------------------------------------------------------------------------------------------------------------------------------------------------------------------------------------------------------------------------------------------------------------------------------------------------------------------------------------------------------------------------------------------------------------------------------------------------------------------------------------------------------------------------------------------------------------------------------------------------------------------------------------------------------------------------------------------------------------------------------------------------------------------------------------------------------------------------------------------------------------------------------------------------------------------------------------------------------------------------------------------------------------------------------------------------------------------------------------------------------------------------------------------------------------------------------------------------------------------------------------------------|

**Supplementary Table 9: Accession numbers for the Africa influenza, clade references, and vaccine viral sequences per subtype downloaded from GISAID database (accessed on 27<sup>th</sup> February 2020) and analysed in this study.** We gratefully acknowledge the authors from the originating laboratories responsible for obtaining the specimens and the submitting laboratories where genetic sequence data were generated and shared via the GISAID EpiFlu Initiative, on which this research is based. All submitters of data may be contacted directly via [www.gisaid.org](http://www.gisaid.org)<sup>10</sup>.

## References

1. Larsson, A. AliView: a fast and lightweight alignment viewer and editor for large datasets. *Bioinformatics* **30**, 3276–3278 (2014).
2. ECDC. Influenza Virus Characterisation Reports, summary Europe. *European Centre for Disease Prevention and Control* <https://www.ecdc.europa.eu/en/seasonal-influenza/surveillance-and-disease-data/influenza-virus-characterisation> (2010).
3. Lutwama, J. J. *et al.* Clinic- and hospital-based sentinel influenza surveillance, Uganda 2007-2010. *J. Infect. Dis.* **206 Suppl 1**, S87-93 (2012).
4. C.D.C. *Protocol of real time RTPCR for influenza A(H1N1)*. *The WHO Collaborating Centre for influenza at CDC*. vol. 9 (USA, 2009).
5. Zhou, B. *et al.* Multiplex Reverse Transcription-PCR for Simultaneous Surveillance of Influenza A and B Viruses. *J. Clin. Microbiol.* **55**, 3492–3501 (2017).
6. Xu, H. *et al.* FastUniq: A Fast De Novo Duplicates Removal Tool for Paired Short Reads. *PLOS ONE* **7**, e52249 (2012).
7. Bolger, A. M., Lohse, M. & Usadel, B. Trimmomatic: a flexible trimmer for Illumina sequence data. *Bioinformatics* **30**, 2114–2120 (2014).
8. Shepard, S. S. *et al.* Viral deep sequencing needs an adaptive approach: IRMA, the iterative refinement meta-assembler. *BMC Genom* **17**, (2016).
9. Edgar, R. C. MUSCLE: multiple sequence alignment with high accuracy and high through put. *Nucleic Acid Res* **32**, (2004).
10. Shu, Y. & McCauley, J. GISAID: Global initiative on sharing all influenza data – from vision to reality. *Eurosurveillance* **22**, 30494 (2017).
